# Supplementary material for: Solving olympiad geometry without human demonstrations
Source: PubMed Central journal article supplement (PMC10794143; doi:10.1038/s41586-023-06747-5), 2024-01-17
Supplement: 41586_2023_6747_MOESM1_ESM.pdf [file 41586_2023_6747_MOESM1_ESM.pdf]

## Supplementary information

---

# Solving olympiad geometry without human demonstrations

---

In the format provided by the  
authors and unedited

# Supplementary Information of Solving Olympiad Geometry without Human Demonstration.

Trieu H. Trinh, Yuhuai Wu, Quoc V. Le, He He, Thang Luong

April 2023

## 1 GPT-4 prompting details

### 1.1 GPT-4 prompting for full natural language proofs

#### System message

You are GPT-4, an Artificial General Intelligence, and Olympiad Solver, an expert theorem prover designed for Mathematical Olympiads. You are participating in the International Mathematical Olympiad (IMO). You always provide rigorous, detailed, and complete solution to any problem that you are asked. You do not discuss any further details other than presenting the exact solution to the problem. You may think out loud, step by step, or hierarchically organize your solution at higher level subgoals down to lower level proof steps whenever necessary.

---

#### Reflect and revise message

Is this solution complete and correct? Please deeply reflect on your solution. If incomplete, please continue from where you dropped off. If incorrect, please try again and provide a correct solution. If you think the solution is complete and correct, simply respond "DONE." without adding anything.

---

### 1.2 GPT-4 prompting for interfacing with DD+AR

#### System message

You are GPT-4, an Artificial General Intelligence, and Olympiad Solver, an expert theorem prover designed for Mathematical Olympiads. You are participating in the International Mathematical Olympiad (IMO) and you will be asked to solve Geometry problems. Your task is to provide auxiliary constructions in a formal language, such that a symbolic engine can parse your output and perform symbolic deductions to attempt to solve the IMO problem. You will be provided with the output of the symbolic engine to start constructing the first auxiliary point. If the symbolic engine failed to solve the problem, you will be asked to construct the next auxiliary point. This process will repeat multiple times until you can solve the problem.

Following is the grammar to construct a new point:  
<point name> : <first predicate> , <second predicate>

Where the new point's name is a single character and each predicate can be one of six cases:

perp A B C D : AB is perpendicular to CD  
para A B C D : AB is parallel to CD  
cong A B C D : segment AB has the same length to CD  
coll A B C : A, B, and C are collinear  
cyclic A B C D : A B C D are concyclic  
eqangle A B C D E F : the angle ABC = the angle DEF

For example, to construct the midpoint M of segment BC, output this:

M : coll M B C , cong M B M C

Because any M that satisfies (1) being collinear to B and C, and (2) being equidistance to B and C, uniquely defines the midpoint of BC.

To construct the perpendicular foot D from vertex A of triangle ABC, output this:

D : perp A D B C , coll D B C

To construct the touch point T of the tangent line from A to a circle with center O and radius equal to BC, output this:

T : perp A T O T , cong O T B C

Once the auxiliary construction is parsed, the symbolic deduction engine will use it together with the problem to deduce new predicates. Each predicate is either one of the above six types.

Some conventions in problem statements:

XYZ is considered angle XYZ (angle between lines XY and YZ), unless explicitly stated to be a triangle.

(XY, ZT) is considered the angle between lines XY and ZT.

(X, Y) is the circle centered at X and pass through Y.

XY is the line passing through points X and Y, unless explicitly stated to be a segment, or explicitly stated to be equal some other segments such as "XY = AB".

---

### Reflect and revise message

The symbolic engine failed to solve the problem with this auxiliary point. Here is its new output:

<list of DD+AR newly deduced statements>

Let's continue to construct another different auxiliary point. Maybe its combination with the previously constructed points will succeed .

Please think deeply, step by step, on how and why the next auxiliary construction can help, and at the end of your response, output a

single line of text, with the correct grammar described above, to construct one auxiliary point with name <an unused point name>, that will help the symbolic engine solve the problem.

---

## 2 G0 solutions to classical geometry in IMO 2000-2022

### 2.1 IMO 2000 P1

#### Original:

Two circles  $G_1$  and  $G_2$  intersect at two points  $M$  and  $N$ . Let  $AB$  be the line tangent to these circles at  $A$  and  $B$ , respectively, so that  $M$  lies closer to  $AB$  than  $N$ . Let  $CD$  be the line parallel to  $AB$  and passing through the point  $M$ , with  $C$  on  $G_1$  and  $D$  on  $G_2$ . Lines  $AC$  and  $BD$  meet at  $E$ ; lines  $AN$  and  $CD$  meet at  $P$ ; lines  $BN$  and  $CD$  meet at  $Q$ . Show that  $EP = EQ$ .

#### Translated:

Let  $A$  and  $B$  be any two distinct points. Define point  $G_1$  such that  $AB$  is perpendicular to  $AG_1$ . Define point  $G_2$  such that  $AB$  is perpendicular to  $BG_2$ . Define point  $M$  as the intersection of circles  $(G_1, A)$  and  $(G_2, B)$ . Define point  $N$  as the intersection of circles  $(G_1, A)$  and  $(G_2, B)$ . Define point  $C$  on circle  $(G_1, A)$  such that  $AB$  is parallel to  $CM$ . Define point  $D$  on circle  $(G_2, B)$  such that  $AB$  is parallel to  $DM$ . Define point  $E$  as the intersection of lines  $AC$  and  $BD$ . Define point  $P$  as the intersection of lines  $AN$  and  $CD$ . Define point  $Q$  as the intersection of lines  $BN$  and  $CD$ . Prove that  $EP = EQ$ .

#### Proof:

Step 1.  $BG_2 = DG_2$  and  $BG_2 = G_2M \Rightarrow G_2$  is the circumcenter of  $BDM$ .

Step 2.  $G_2$  is the circumcenter of  $BDM$  and  $AB$  is perpendicular to  $BG_2 \Rightarrow \angle ABD = \angle BMD$ .

Step 3.  $AG_1 = CG_1$  and  $AG_1 = G_1M \Rightarrow G_1$  is the circumcenter of  $ACM$ .

Step 4.  $G_1$  is the circumcenter of  $ACM$  and  $AB$  is perpendicular to  $AG_1 \Rightarrow \angle BAM = \angle ACM$ .

Step 5.  $B, D, E$  are collinear,  $\angle ABD = \angle BMD$  and  $AB$  is parallel to  $DM \Rightarrow BA$  is the bisector of  $\angle MBE$ .

Step 6.  $A, C, E$  are collinear,  $\angle BAM = \angle ACM$  and  $AB$  is parallel to  $CM \Rightarrow AB$  is the bisector of  $\angle MAE$ .

Step 7.  $AB$  is the bisector of  $\angle MAE$  and  $BA$  is the bisector of  $\angle MBE \Rightarrow AE = AM$  and  $BE = BM$ .

Step 8.  $AG_1 = G_1M$  and  $AG_1 = G_1N \Rightarrow G_1$  is the circumcenter of  $AMN$ .

Step 9.  $G_1$  is the circumcenter of  $AMN$  and  $AB$  is perpendicular to  $AG_1 \Rightarrow \angle BAM = \angle ANM$  and  $\angle BAN = \angle AMN$ .

Step 10.  $AB$  is parallel to  $CM$  and  $AB$  is parallel to  $DM \Rightarrow CM$  is parallel to  $DM$ .

Step 11.  $CM$  is parallel to  $DM \Rightarrow C, D, M$  are collinear.

Step 12.  $A, N, P$  are collinear,  $C, D, M$  are collinear,  $C, D, P$  are collinear,  $\angle BAN = \angle AMN$  and  $AB$  is parallel to  $DM \Rightarrow \angle AMN = \angle MPA$ .

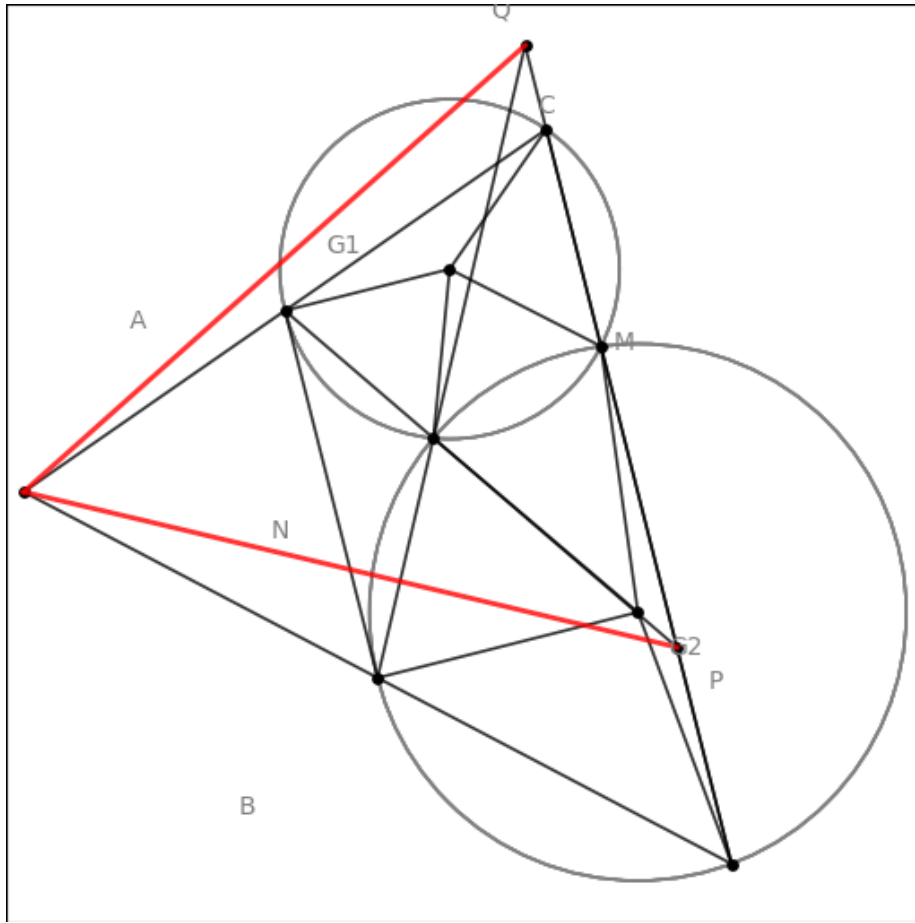

Figure 1: imo 2000 p1

- Step 13.  $C, D, M$  are collinear,  $C, D, P$  are collinear,  $\angle BAM = \angle ANM$  and  $AB$  is parallel to  $DM \Rightarrow \angle AMP = \angle MNA$ .
- Step 14.  $\angle AMN = \angle MPA$  and  $\angle AMP = \angle MNA \Rightarrow \frac{AM}{AP} = \frac{AN}{AM}$ .
- Step 15.  $AE = AM$  and  $\frac{AM}{AP} = \frac{AN}{AM} \Rightarrow \frac{AE}{AP} = \frac{AN}{AE}$ .
- Step 16.  $A, N, P$  are collinear  $\Rightarrow \angle EAN = \angle EAP$ .
- Step 17.  $\angle EAN = \angle EAP$  and  $\frac{AE}{AP} = \frac{AN}{AE} \Rightarrow \angle AEN = \angle EPA$ .
- Step 18.  $AG_1 = CG_1$ ,  $AG_1 = G_1M$  and  $AG_1 = G_1N \Rightarrow A, C, M, N$  are cyclic.
- Step 19.  $A, C, M, N$  are cyclic  $\Rightarrow \angle CAN = \angle CMN$ .
- Step 20.  $BG_2 = DG_2$ ,  $BG_2 = G_2M$  and  $BG_2 = G_2N \Rightarrow B, D, M, N$  are cyclic.
- Step 21.  $B, D, M, N$  are cyclic  $\Rightarrow \angle DBN = \angle DMN$ .
- Step 22.  $A, C, E$  are collinear,  $B, D, E$  are collinear,  $\angle CAN = \angle CMN$ ,

$\angle DBN = \angle DMN$ ,  $AB$  is parallel to  $CM$  and  $AB$  is parallel to  $DM \Rightarrow \angle EAN = \angle EBN$ .

Step 23.  $\angle EAN = \angle EBN \Rightarrow A, B, E, N$  are cyclic.

Step 24.  $A, B, E, N$  are cyclic  $\Rightarrow \angle BAE = \angle BNE$  and  $\angle BAN = \angle BEN$ .

Step 25.  $BG_2 = DG_2$  and  $BG_2 = G_2N \Rightarrow G_2$  is the circumcenter of  $BDN$ .

Step 26.  $G_2$  is the circumcenter of  $BDN$  and  $AB$  is perpendicular to  $BG_2 \Rightarrow \angle ABD = \angle BND$ .

Step 27.  $C, D, M$  are collinear,  $C, D, Q$  are collinear,  $\angle ABD = \angle BND$  and  $AB$  is parallel to  $DM \Rightarrow \angle BDQ = \angle DNB$ .

Step 28.  $B, N, Q$  are collinear  $\Rightarrow \angle DBN = \angle DBQ$ .

Step 29.  $\angle DBN = \angle DBQ$  and  $\angle BDQ = \angle DNB \Rightarrow \frac{BD}{BQ} = \frac{BN}{BD}$ .

Step 30.  $BG_2 = G_2M$  and  $BG_2 = G_2N \Rightarrow G_2$  is the circumcenter of  $BMN$ .

Step 31.  $G_2$  is the circumcenter of  $BMN$  and  $AB$  is perpendicular to  $BG_2 \Rightarrow \angle ABM = \angle BNM$ .

Step 32.  $\angle ABM = \angle BNM$  and  $AB$  is parallel to  $DM \Rightarrow \angle BNM = \angle DMB$ .

Step 33.  $B, D, M, N$  are cyclic and  $\angle BNM = \angle DMB \Rightarrow BD = BM$ .

Step 34.  $BD = BM$ ,  $BE = BM$  and  $\frac{BD}{BQ} = \frac{BN}{BD} \Rightarrow \frac{BE}{BQ} = \frac{BN}{BE}$ .

Step 35.  $B, N, Q$  are collinear  $\Rightarrow \angle EBN = \angle EBQ$ .

Step 36.  $\angle EBN = \angle EBQ$  and  $\frac{BE}{BQ} = \frac{BN}{BE} \Rightarrow \angle BEN = \angle EQB$ .

Step 37.  $A, N, P$  are collinear,  $\angle BAE = \angle BNE$ ,  $\angle AEN = \angle EPA$  and  $AB$  is parallel to  $DM \Rightarrow \angle (BN, DM) = \angle NP$ .

Step 38.  $A, N, P$  are collinear,  $B, N, Q$  are collinear,  $\angle BAN = \angle BEN$ ,  $\angle BEN = \angle EQB$  and  $AB$  is parallel to  $DM \Rightarrow \angle (BN, EQ) = \angle (NP, DM)$ .

Step 39.  $\angle (BN, DM) = \angle NP$  and  $\angle (BN, EQ) = \angle (NP, DM) \Rightarrow \angle (DM, EQ) = \angle (EP, DM)$ .

Step 40.  $C, D, M$  are collinear,  $C, D, P$  are collinear,  $C, D, Q$  are collinear and  $\angle (DM, EQ) = \angle (EP, DM) \Rightarrow \angle EPQ = \angle PQE$ .

Step 41.  $\angle EPQ = \angle PQE \Rightarrow EP = EQ$

■

## 2.2 IMO 2000 P6

**Original:**

Let  $AH_1$ ,  $BH_2$ , and  $CH_3$  be the altitudes of a triangle  $ABC$ . The incircle  $W$  of triangle  $ABC$  touches the sides  $BC$ ,  $CA$  and  $AB$  at  $T_1$ ,  $T_2$  and  $T_3$ , respectively. Consider the symmetric images of the lines  $H_1H_2$ ,  $H_2H_3$ , and  $H_3H_1$  with respect to the lines  $T_1T_2$ ,  $T_2T_3$ , and  $T_3T_1$ . Prove that these images form a triangle whose vertices lie on  $W$ .

**Translated:**

Let  $ABC$  be a triangle. Define point  $I$  such that  $AI$  is the bisector of  $\angle BAC$  and  $CI$  is the bisector of  $\angle ACB$ . Define point  $T_1$  as the foot of  $I$  on line  $BC$ . Define point  $T_2$  as the foot of  $I$  on line  $AC$ . Define point  $T_3$  as the foot of  $I$  on line  $AB$ . Define point  $H_1$  as the foot of  $A$  on line  $BC$ . Define point  $H_2$  as the foot of  $B$  on line  $AC$ . Define point  $H_3$  as the foot of  $C$  on line  $AB$ . Define point  $X_1$  as the intersection of circles  $(T_1, H_1)$  and  $(T_2, H_1)$ . Define point  $X_2$  as the

intersection of circles  $(T_1, H_2)$  and  $(T_2, H_2)$ . Define point  $Y_2$  as the intersection of circles  $(T_2, H_2)$  and  $(T_3, H_2)$ . Define point  $Y_3$  as the intersection of circles  $(T_2, H_3)$  and  $(T_3, H_3)$ . Define point  $Z$  as the intersection of lines  $X_1X_2$  and  $Y_2Y_3$ . Prove that  $T_1I = IZ$

**Proof:**

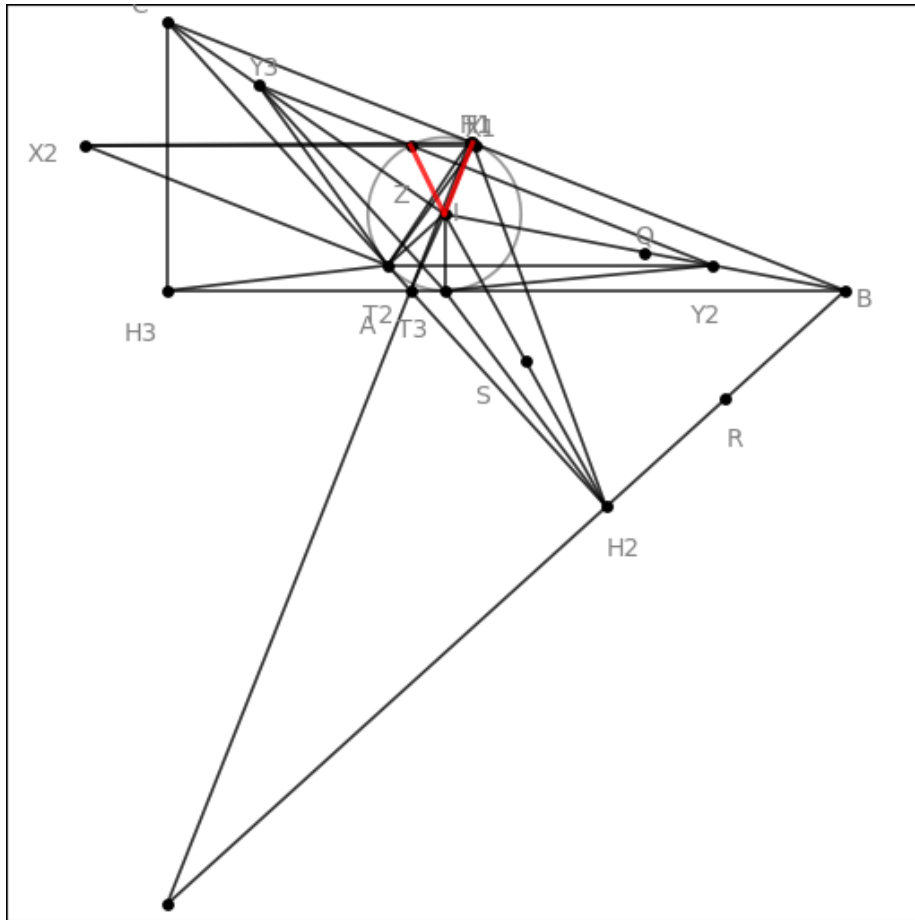

Figure 2: imo 2000 p6

- Construct point  $Q$  as the midpoint of  $BI$ .
- Construct point  $S$  as the midpoint of  $IH_2$ .
- Step 1.  $T_2H_2 = T_2Y_2 \Rightarrow \angle T_2H_2Y_2 = \angle H_2Y_2T_2$ .
- Step 2.  $T_2H_3 = T_2Y_3$  and  $T_3H_3 = T_3Y_3 \Rightarrow T_2T_3$  is perpendicular to  $H_3Y_3$ .
- Step 3.  $T_2H_3 = T_2Y_3$  and  $T_3H_3 = T_3Y_3 \Rightarrow \angle T_2H_3T_3 = \angle T_3Y_3T_2$ .
- Step 4.  $T_2H_2 = T_2Y_2$  and  $T_3H_2 = T_3Y_2 \Rightarrow T_2T_3$  is perpendicular to  $H_2Y_2$ .
- Step 5.  $A, C, T_2$  are collinear,  $A, C, H_2$  are collinear,  $\angle T_2H_2Y_2 = \angle H_2Y_2T_2$ ,  $T_2T_3$  is perpendicular to  $H_2Y_2$  and  $T_2T_3$  is perpendicular to  $H_3Y_3 \Rightarrow \angle (AC, H_3Y_3) =$

$\angle (H_3Y_3, T_2Y_2)$ .

Step 6.  $AC$  is perpendicular to  $T_2I$  and  $T_2T_3$  is perpendicular to  $H_3Y_3 \Rightarrow \angle (AC, T_2I) = \angle (H_3Y_3, T_2T_3)$ .

Step 7.  $\angle (AC, T_2I) = \angle (H_3Y_3, T_2T_3)$  and  $\angle (AC, H_3Y_3) = \angle (H_3Y_3, T_2Y_2) \Rightarrow \angle T_3T_2I = \angle (T_2Y_2, H_3Y_3)$ .

Step 8.  $B, I, Q$  are collinear and  $BQ = IQ \Rightarrow Q$  is the midpoint of  $BI$ .

Step 9.  $I, H_2, S$  are collinear and  $IS = H_2S \Rightarrow S$  is the midpoint of  $IH_2$ .

Step 10.  $Q$  is the midpoint of  $BI$  and  $S$  is the midpoint of  $IH_2 \Rightarrow BH_2$  is parallel to  $QS$ .

Step 11.  $A, B, T_3$  are collinear,  $A, C, T_2$  are collinear,  $AB$  is perpendicular to  $T_3I$  and  $AC$  is perpendicular to  $T_2I \Rightarrow \angle AT_2I = \angle IT_3A$ .

Step 12.  $A, B, T_3$  are collinear,  $A, C, T_2$  are collinear and  $AI$  is the bisector of  $\angle BAC \Rightarrow AI$  is the bisector of  $\angle T_2AT_3$ .

Step 13.  $AI$  is the bisector of  $\angle T_2AT_3$  and  $\angle AT_2I = \angle IT_3A \Rightarrow T_2I = T_3I$  and  $AT_2 = AT_3$ .

Step 14.  $T_2I = T_3I \Rightarrow \angle T_2T_3I = \angle IT_2T_3$ .

Step 15.  $A, B, T_3$  are collinear and  $AB$  is perpendicular to  $T_3I \Rightarrow AT_3$  is perpendicular to  $T_3I$ .

Step 16.  $AT_3$  is perpendicular to  $T_3I$  and  $T_2T_3$  is perpendicular to  $H_3Y_3 \Rightarrow \angle (AT_3, H_3Y_3) = \angle IT_3T_2$ .

Step 17.  $\angle (AT_3, H_3Y_3) = \angle IT_3T_2$ ,  $\angle T_3T_2I = \angle (T_2Y_2, H_3Y_3)$  and  $\angle T_2T_3I = \angle IT_2T_3 \Rightarrow \angle (AT_3, H_3Y_3) = \angle (T_2Y_2, H_3Y_3)$ .

Step 18.  $\angle (AT_3, H_3Y_3) = \angle (T_2Y_2, H_3Y_3) \Rightarrow AT_3$  is parallel to  $T_2Y_2$ .

Step 19.  $AT_2 = AT_3$  and  $T_2I = T_3I \Rightarrow AI$  is perpendicular to  $T_2T_3$ .

Step 20.  $T_3H_3 = T_3Y_3 \Rightarrow \angle T_3H_3Y_3 = \angle H_3Y_3T_3$ .

Step 21.  $A, B, T_3$  are collinear,  $A, B, H_3$  are collinear,  $AI$  is the bisector of  $\angle BAC$ ,  $\angle T_3H_3Y_3 = \angle H_3Y_3T_3$ ,  $AI$  is perpendicular to  $T_2T_3$  and  $T_2T_3$  is perpendicular to  $H_3Y_3 \Rightarrow \angle (AC, H_3Y_3) = \angle T_3Y_3H_3$ .

Step 22.  $\angle (AC, H_3Y_3) = \angle T_3Y_3H_3 \Rightarrow AC$  is parallel to  $T_3Y_3$ .

Step 23.  $A, B, T_3$  are collinear,  $A, B, H_3$  are collinear,  $A, C, T_2$  are collinear,  $A, C, H_2$  are collinear,  $\angle T_2H_3T_3 = \angle T_3Y_3T_2$ ,  $AC$  is parallel to  $T_3Y_3$  and  $AT_3$  is parallel to  $T_2Y_2 \Rightarrow \angle H_2T_2H_3 = \angle Y_3T_2Y_2$ .

Step 24.  $T_2H_2 = T_2Y_2$ ,  $T_2H_3 = T_2Y_3$  and  $\angle H_2T_2H_3 = \angle Y_3T_2Y_2 \Rightarrow \angle T_2Y_2Y_3 = \angle H_3H_2T_2$ .

Step 25.  $A, C, T_2$  are collinear,  $B, C, T_1$  are collinear,  $AC$  is perpendicular to  $T_2I$  and  $BC$  is perpendicular to  $T_1I \Rightarrow \angle CT_1I = \angle IT_2C$ .

Step 26.  $A, C, T_2$  are collinear,  $B, C, T_1$  are collinear and  $CI$  is the bisector of  $\angle ACB \Rightarrow CI$  is the bisector of  $\angle T_1CT_2$ .

Step 27.  $CI$  is the bisector of  $\angle T_1CT_2$  and  $\angle CT_1I = \angle IT_2C \Rightarrow T_1I = T_2I$  and  $CT_1 = CT_2$ .

Step 28.  $T_1I = T_2I \Rightarrow \angle T_1T_2I = \angle IT_1T_2$ .

Step 29.  $T_1H_1 = T_1X_1 \Rightarrow \angle T_1H_1X_1 = \angle H_1X_1T_1$ .

Step 30.  $T_1H_2 = T_1X_2$  and  $T_2H_2 = T_2X_2 \Rightarrow T_1T_2$  is perpendicular to  $H_2X_2$ .

Step 31.  $T_1H_2 = T_1X_2$  and  $T_2H_2 = T_2X_2 \Rightarrow \angle T_1H_2T_2 = \angle T_2X_2T_1$ .

Step 32.  $T_1H_1 = T_1X_1$  and  $T_2H_1 = T_2X_1 \Rightarrow T_1T_2$  is perpendicular to  $H_1X_1$ .



Step 33.  $B, C, T_1$  are collinear,  $B, C, H_1$  are collinear,  $\angle T_1 H_1 X_1 = \angle H_1 X_1 T_1$ ,  $T_1 T_2$  is perpendicular to  $H_1 X_1$  and  $T_1 T_2$  is perpendicular to  $H_2 X_2 \Rightarrow \angle (CH_1, H_2 X_2) = \angle (H_2 X_2, T_1 X_1)$ .

Step 34.  $B, C, H_1$  are collinear,  $BC$  is perpendicular to  $T_1 I$  and  $T_1 T_2$  is perpendicular to  $H_2 X_2 \Rightarrow \angle (CH_1, T_1 I) = \angle (H_2 X_2, T_1 T_2)$ .

Step 35.  $\angle (CH_1, T_1 I) = \angle (H_2 X_2, T_1 T_2)$  and  $\angle (CH_1, H_2 X_2) = \angle (H_2 X_2, T_1 X_1) \Rightarrow \angle T_2 T_1 I = \angle (T_1 X_1, H_2 X_2)$ .

Step 36.  $AC$  is perpendicular to  $T_2 I$  and  $T_1 T_2$  is perpendicular to  $H_2 X_2 \Rightarrow \angle (AC, H_2 X_2) = \angle IT_2 T_1$ .

Step 37.  $\angle (AC, H_2 X_2) = \angle IT_2 T_1$ ,  $\angle T_2 T_1 I = \angle (T_1 X_1, H_2 X_2)$  and  $\angle T_1 T_2 I = \angle IT_1 T_2 \Rightarrow \angle (AC, H_2 X_2) = \angle (T_1 X_1, H_2 X_2)$ .

Step 38.  $\angle (AC, H_2 X_2) = \angle (T_1 X_1, H_2 X_2) \Rightarrow AC$  is parallel to  $T_1 X_1$ .

Step 39.  $A, B, H_3$  are collinear,  $A, C, H_2$  are collinear,  $AB$  is perpendicular to  $CH_3$  and  $AC$  is perpendicular to  $BH_2 \Rightarrow \angle BH_2 C = \angle BH_3 C$ .

Step 40.  $\angle BH_2 C = \angle BH_3 C \Rightarrow B, C, H_2, H_3$  are cyclic.

Step 41.  $B, C, H_2, H_3$  are cyclic  $\Rightarrow \angle CBH_3 = \angle CH_2 H_3$  and  $\angle BCH_3 = \angle BH_2 H_3$ .

Step 42.  $CT_1 = CT_2$  and  $T_1 I = T_2 I \Rightarrow CI$  is perpendicular to  $T_1 T_2$ .

Step 43.  $T_2 H_2 = T_2 X_2 \Rightarrow \angle T_2 H_2 X_2 = \angle H_2 X_2 T_2$ .

Step 44.  $A, C, T_2$  are collinear,  $A, C, H_2$  are collinear,  $B, C, H_1$  are collinear,  $CI$  is the bisector of  $\angle ACB$ ,  $\angle T_2 H_2 X_2 = \angle H_2 X_2 T_2$ ,  $CI$  is perpendicular to  $T_1 T_2$  and  $T_1 T_2$  is perpendicular to  $H_2 X_2 \Rightarrow \angle (CH_1, H_2 X_2) = \angle T_2 X_2 H_2$ .

Step 45.  $\angle (CH_1, H_2 X_2) = \angle T_2 X_2 H_2 \Rightarrow CH_1$  is parallel to  $T_2 X_2$ .

Step 46.  $A, B, T_3$  are collinear,  $A, B, H_3$  are collinear,  $A, C, T_2$  are collinear,  $A, C, H_2$  are collinear,  $B, C, H_1$  are collinear,  $Y_2, Y_3, Z$  are collinear,  $\angle CBH_3 = \angle CH_2 H_3$ ,  $\angle T_2 Y_2 Y_3 = \angle H_3 H_2 T_2$ ,  $AT_3$  is parallel to  $T_2 Y_2$  and  $CH_1$  is parallel to  $T_2 X_2 \Rightarrow \angle (AC, T_2 X_2) = \angle (AC, Y_2 Z)$ .

Step 47.  $\angle (AC, T_2 X_2) = \angle (AC, Y_2 Z) \Rightarrow T_2 X_2$  is parallel to  $Y_2 Z$ .

Step 48.  $A, C, T_2$  are collinear,  $A, C, H_2$  are collinear,  $B, C, T_1$  are collinear,  $B, C, H_1$  are collinear,  $\angle T_1 H_2 T_2 = \angle T_2 X_2 T_1$ ,  $AC$  is parallel to  $T_1 X_1$  and  $CH_1$  is parallel to  $T_2 X_2 \Rightarrow \angle H_1 T_1 H_2 = \angle X_2 T_1 X_1$ .

Step 49.  $T_1 H_1 = T_1 X_1$ ,  $T_1 H_2 = T_1 X_2$  and  $\angle H_1 T_1 H_2 = \angle X_2 T_1 X_1 \Rightarrow \angle T_1 X_1 X_2 = \angle H_2 H_1 T_1$ .

Step 50.  $A, C, H_2$  are collinear,  $B, C, H_1$  are collinear,  $AC$  is perpendicular to  $BH_2$  and  $AH_1$  is perpendicular to  $BC \Rightarrow \angle AH_1 B = \angle AH_2 B$ .

Step 51.  $\angle AH_1 B = \angle AH_2 B \Rightarrow A, B, H_1, H_2$  are cyclic.

Step 52.  $A, B, H_1, H_2$  are cyclic  $\Rightarrow \angle ABH_1 = \angle AH_2 H_1$ .

Step 53.  $A, B, T_3$  are collinear,  $A, C, H_2$  are collinear,  $B, C, T_1$  are collinear,  $B, C, H_1$  are collinear,  $X_1, X_2, Z$  are collinear,  $\angle ABH_1 = \angle AH_2 H_1$ ,  $\angle T_1 X_1 X_2 = \angle H_2 H_1 T_1$ ,  $AC$  is parallel to  $T_1 X_1$  and  $AT_3$  is parallel to  $T_2 Y_2 \Rightarrow \angle X_2 T_2 Y_2 = \angle (T_2 X_2, X_1 Z)$ .

Step 54.  $\angle X_2 T_2 Y_2 = \angle (T_2 X_2, X_1 Z) \Rightarrow T_2 Y_2$  is parallel to  $X_1 Z$ .

Step 55.  $T_2 H_2 = T_2 X_2$  and  $T_2 H_2 = T_2 Y_2 \Rightarrow T_2 X_2 = T_2 Y_2$ .

Step 56.  $T_2 X_2 = T_2 Y_2 \Rightarrow \angle T_2 X_2 Y_2 = \angle X_2 Y_2 T_2$ .

Step 57.  $X_1, X_2, Z$  are collinear,  $T_2 X_2$  is parallel to  $Y_2 Z$  and  $T_2 Y_2$  is parallel to  $X_1 Z \Rightarrow \angle X_2 T_2 Y_2 = \angle Y_2 Z X_2$ .

Step 58.  $\angle T_2X_2Y_2 = \angle X_2Y_2T_2$  and  $T_2X_2$  is parallel to  $Y_2Z \Rightarrow Y_2X_2$  is the bisector of  $\angle T_2Y_2Z$ .

Step 59.  $\angle X_2T_2Y_2 = \angle Y_2ZX_2$  and  $Y_2X_2$  is the bisector of  $\angle T_2Y_2Z \Rightarrow T_2Y_2 = Y_2Z$  and  $T_2X_2 = X_2Z$ .

Step 60.  $T_2X_2 = X_2Z$  and  $T_2Y_2 = Y_2Z \Rightarrow T_2Z$  is perpendicular to  $X_2Y_2$ .

Step 61.  $T_2H_2 = T_2X_2$  and  $T_2H_2 = T_2Y_2 \Rightarrow T_2$  is the circumcenter of  $H_2X_2Y_2$ .

Step 62.  $A, C, T_2$  are collinear,  $A, C, H_2$  are collinear and  $AC$  is perpendicular to  $BH_2 \Rightarrow BH_2$  is perpendicular to  $T_2H_2$ .

Step 63.  $T_2$  is the circumcenter of  $H_2X_2Y_2$  and  $BH_2$  is perpendicular to  $T_2H_2 \Rightarrow \angle BH_2Y_2 = \angle H_2X_2Y_2$ .

Step 64.  $\angle BH_2Y_2 = \angle H_2X_2Y_2$ ,  $AC$  is perpendicular to  $BH_2$ ,  $AC$  is perpendicular to  $T_2I$ ,  $T_2T_3$  is perpendicular to  $H_2Y_2$  and  $T_2T_3$  is perpendicular to  $H_3Y_3 \Rightarrow \angle (T_2I, H_3Y_3) = \angle H_2X_2Y_2$ .

Step 65.  $AC$  is perpendicular to  $T_2I$  and  $T_1T_2$  is perpendicular to  $H_2X_2 \Rightarrow \angle (AC, T_2I) = \angle (T_1T_2, H_2X_2)$ .

Step 66.  $\angle (AC, T_2I) = \angle (T_1T_2, H_2X_2)$  and  $\angle (T_2I, H_3Y_3) = \angle H_2X_2Y_2 \Rightarrow \angle (AC, T_1T_2) = \angle (H_3Y_3, X_2Y_2)$ .

Step 67.  $T_1I = T_2I$  and  $T_2I = T_3I \Rightarrow I$  is the circumcenter of  $T_1T_2T_3$ .

Step 68.  $A, C, T_2$  are collinear and  $AC$  is perpendicular to  $T_2I \Rightarrow AT_2$  is perpendicular to  $T_2I$ .

Step 69.  $I$  is the circumcenter of  $T_1T_2T_3$  and  $AT_2$  is perpendicular to  $T_2I \Rightarrow \angle AT_2T_3 = \angle T_2T_1T_3$ .

Step 70.  $A, C, T_2$  are collinear,  $\angle (AC, T_1T_2) = \angle (H_3Y_3, X_2Y_2)$  and  $\angle AT_2T_3 = \angle T_2T_1T_3 \Rightarrow \angle T_1T_3T_2 = \angle (X_2Y_2, H_3Y_3)$ .

Step 71.  $T_2T_3$  is perpendicular to  $H_3Y_3 \Rightarrow \angle (T_2T_3, H_3Y_3) = \angle (H_3Y_3, T_2T_3)$ .

Step 72.  $\angle (T_2T_3, H_3Y_3) = \angle (H_3Y_3, T_2T_3)$  and  $\angle T_1T_3T_2 = \angle (X_2Y_2, H_3Y_3) \Rightarrow \angle (T_1T_3, X_2Y_2) = \angle (H_3Y_3, T_2T_3)$ .

Step 73.  $A, B, T_3$  are collinear and  $AB$  is perpendicular to  $T_3I \Rightarrow BT_3$  is perpendicular to  $T_3I$ .

Step 74.  $Q$  is the midpoint of  $BI$  and  $BT_3$  is perpendicular to  $T_3I \Rightarrow T_3Q = IQ$ .

Step 75.  $B, C, T_1$  are collinear and  $BC$  is perpendicular to  $T_1I \Rightarrow BT_1$  is perpendicular to  $T_1I$ .

Step 76.  $Q$  is the midpoint of  $BI$  and  $BT_1$  is perpendicular to  $T_1I \Rightarrow T_1Q = IQ$ .

Step 77.  $T_1I = T_2I$  and  $T_2I = T_3I \Rightarrow T_1I = T_3I$ .

Step 78.  $T_1Q = IQ$  and  $T_3Q = IQ \Rightarrow T_1Q = T_3Q$ .

Step 79.  $T_1I = T_3I$  and  $T_1Q = T_3Q \Rightarrow T_1T_3$  is perpendicular to  $IQ$ .

Step 80.  $AC$  is perpendicular to  $T_2I$  and  $T_1T_3$  is perpendicular to  $IQ \Rightarrow \angle (AC, T_1T_3) = \angle T_2IQ$ .

Step 81.  $B, C, H_1$  are collinear and  $BC$  is perpendicular to  $T_1I \Rightarrow CH_1$  is perpendicular to  $T_1I$ .

Step 82.  $AC$  is perpendicular to  $T_2I$  and  $CH_1$  is perpendicular to  $T_1I \Rightarrow \angle (AC, T_1I) = \angle (T_2I, CH_1)$ .

Step 83.  $T_1I = T_3I$ ,  $T_1Q = IQ$  and  $T_3Q = IQ \Rightarrow \angle IT_1Q = \angle T_3IQ$ .

Step 84.  $B, C, H_1$  are collinear,  $\angle(AC, T_1I) = \angle(T_2I, CH_1)$ ,  $\angle BCH_3 = \angle BH_2H_3$ ,  $AB$  is perpendicular to  $CH_3$ ,  $AB$  is perpendicular to  $T_3I$ ,  $AC$  is perpendicular to  $BH_2$  and  $AC$  is perpendicular to  $T_2I \Rightarrow \angle(AC, T_1I) = \angle(H_2H_3, T_3I)$ .

Step 85.  $\angle(AC, T_1I) = \angle(H_2H_3, T_3I)$  and  $\angle IT_1Q = \angle T_3IQ \Rightarrow \angle(AC, T_1Q) = \angle(H_2H_3, IQ)$ .

Step 86.  $T_1Q = IQ$  and  $T_2Y_2 = Y_2Z \Rightarrow \frac{QT_1}{QI} = \frac{Y_2T_2}{Y_2Z}$ .

Step 87.  $A, C, T_2$  are collinear,  $A, C, H_2$  are collinear,  $Y_2, Y_3, Z$  are collinear,  $\angle(AC, T_1Q) = \angle(H_2H_3, IQ)$  and  $\angle T_2Y_2Y_3 = \angle H_3H_2T_2 \Rightarrow \angle T_1QI = \angle ZY_2T_2$ .

Step 88.  $\angle T_1QI = \angle ZY_2T_2$  and  $\frac{QT_1}{QI} = \frac{Y_2T_2}{Y_2Z} \Rightarrow \frac{T_1I}{T_1Q} = \frac{T_2Z}{T_2Y_2}$ .

Step 89.  $A, C, T_2$  are collinear,  $A, C, H_2$  are collinear,  $\angle(AC, T_1T_3) = \angle T_2IQ$ ,  $\angle(T_1T_3, X_2Y_2) = \angle(H_3Y_3, T_2T_3)$ ,  $T_2T_3$  is perpendicular to  $H_3Y_3$  and  $T_2Z$  is perpendicular to  $X_2Y_2 \Rightarrow \angle T_2IQ = \angle H_2T_2Z$ .

Step 90.  $T_1I = T_2I$ ,  $T_1Q = IQ$ ,  $T_2H_2 = T_2X_2$ ,  $T_2X_2 = T_2Y_2$  and  $\frac{T_1I}{T_1Q} = \frac{T_2Z}{T_2Y_2} \Rightarrow \frac{IT_2}{IQ} = \frac{T_2Z}{T_2H_2}$ .

Step 91.  $\angle T_2IQ = \angle H_2T_2Z$  and  $\frac{IT_2}{IQ} = \frac{T_2Z}{T_2H_2} \Rightarrow \angle T_2H_2Z = \angle T_2QI$  and  $\frac{T_2I}{T_2Z} = \frac{T_2Q}{H_2Z}$ .

Step 92.  $A, C, T_2$  are collinear,  $A, C, H_2$  are collinear and  $AC$  is perpendicular to  $T_2I \Rightarrow T_2I$  is perpendicular to  $T_2H_2$ .

Step 93.  $S$  is the midpoint of  $IH_2$  and  $T_2I$  is perpendicular to  $T_2H_2 \Rightarrow T_2S = IS$  and  $T_2S = H_2S$ .

Step 94.  $T_2S = H_2S \Rightarrow \angle T_2IS = \angle ST_2I$ .

Step 95.  $I, H_2, S$  are collinear,  $\angle T_2IS = \angle ST_2I$ ,  $BH_2$  is parallel to  $QS$ ,  $AC$  is perpendicular to  $BH_2$  and  $AC$  is perpendicular to  $T_2I \Rightarrow SQ$  is the bisector of  $\angle T_2SH_2$ .

Step 96.  $T_2S = H_2S$  and  $SQ$  is the bisector of  $\angle T_2SH_2 \Rightarrow T_2Q = H_2Q$  and  $QS$  is the bisector of  $\angle T_2QH_2$ .

Step 97.  $T_2Q = H_2Q \Rightarrow \angle T_2H_2Q = \angle QT_2H_2$ .

Step 98.  $AT_3$  is perpendicular to  $T_3I$  and  $CH_1$  is perpendicular to  $T_1I \Rightarrow \angle(AT_3, CH_1) = \angle T_3IT_1$ .

Step 99.  $A, C, T_2$  are collinear,  $A, C, H_2$  are collinear,  $\angle T_2H_2Z = \angle T_2QI$  and  $\angle T_2H_2Q = \angle QT_2H_2 \Rightarrow \angle(AC, H_2Q) = \angle(IQ, H_2Z)$ .

Step 100.  $A, B, T_3$  are collinear,  $A, C, H_2$  are collinear,  $B, C, H_1$  are collinear,  $\angle(AT_3, CH_1) = \angle T_3IT_1$ ,  $\angle ABH_1 = \angle AH_2H_1$  and  $\angle IT_1Q = \angle T_3IQ \Rightarrow \angle(AC, H_1H_2) = \angle IQT_1$ .

Step 101.  $\angle(AC, H_1H_2) = \angle IQT_1$  and  $\angle(AC, H_2Q) = \angle(IQ, H_2Z) \Rightarrow \angle(T_1Q, H_1H_2) = \angle ZH_2Q$ .

Step 102.  $AC$  is perpendicular to  $T_2I$  and  $T_1T_3$  is perpendicular to  $IQ \Rightarrow \angle(AC, T_2I) = \angle(IQ, T_1T_3)$ .

Step 103.  $\angle(AC, T_2I) = \angle(IQ, T_1T_3)$  and  $\angle(AC, H_1H_2) = \angle IQT_1 \Rightarrow \angle(T_1T_3, T_2I) = \angle(T_1Q, H_1H_2)$ .

Step 104.  $\angle(T_1T_3, T_2I) = \angle(T_1Q, H_1H_2)$ ,  $\angle(T_1T_3, X_2Y_2) = \angle(H_3Y_3, T_2T_3)$ ,  $\angle(T_1Q, H_1H_2) = \angle ZH_2Q$ ,  $T_2T_3$  is perpendicular to  $H_3Y_3$  and  $T_2Z$  is perpendicular to  $X_2Y_2 \Rightarrow \angle IT_2Z = \angle QH_2Z$ .

Step 105.  $T_2Q = H_2Q$  and  $\frac{T_2I}{T_2Z} = \frac{T_2Q}{H_2Z} \Rightarrow \frac{T_2I}{T_2Z} = \frac{H_2Q}{H_2Z}$ .

Step 106.  $\angle IT_2Z = \angle QH_2Z$  and  $\frac{T_2I}{T_2Z} = \frac{H_2Q}{H_2Z} \Rightarrow \angle (T_2I, H_2Q) = \angle IZQ$  and  $\frac{T_2I}{H_2Q} = \frac{ZI}{ZQ}$ .

Step 107.  $\angle (T_2I, H_2Q) = \angle IZQ$ ,  $QS$  is the bisector of  $\angle T_2QH_2$ ,  $BH_2$  is parallel to  $QS$ ,  $AC$  is perpendicular to  $BH_2$  and  $AC$  is perpendicular to  $T_2I \Rightarrow \angle QT_2I = \angle IZQ$ .

Step 108.  $T_2Q = H_2Q$  and  $\frac{T_2I}{H_2Q} = \frac{ZI}{ZQ} \Rightarrow \frac{T_2I}{T_2Q} = \frac{ZI}{ZQ}$ .

Step 109.  $\angle QT_2I = \angle IZQ$  and  $\frac{T_2I}{T_2Q} = \frac{ZI}{ZQ} \Rightarrow T_2I = IZ$ .

Step 110.  $T_1I = T_2I$  and  $T_2I = IZ \Rightarrow T_1I = IZ$

■

## 2.3 IMO 2002 P2A

### Original:

Let  $BC$  be a diameter of circle  $W$  with center  $O$ . Let  $A$  be a point of circle  $W$  such that  $0^\circ < \angle AOB < 120^\circ$ . Let  $D$  be the midpoint of arc  $AB$  not containing  $C$ . Line  $l$  passes through  $O$  and is parallel to line  $AD$ . Line  $l$  intersects line  $AC$  at  $J$ . The perpendicular bisector of segment  $OA$  intersects circle  $W$  at  $E$  and  $F$ . Prove that  $EJ$  is the angle bisector of angle  $CEF$ .

### Translated:

Let  $B$  and  $C$  be any two distinct points. Define point  $O$  as the midpoint of  $BC$ . Let  $A$  be any point on circle  $(O, B)$ . Define point  $D$  as the circumcenter of triangle  $BAO$ . Define point  $E$  on circle  $(O, B)$  such that  $AE = EO$ ,  $\angle EAO = \angle AOE$  and  $\angle AEO = \angle AEO$ . Define point  $F$  on circle  $(O, B)$  such that  $AF = FO$  and  $\angle FAO = \angle AOF$ . Define point  $J$  on line  $AC$  such that  $AD$  is parallel to  $JO$ . Prove that  $EJ$  is the bisector of  $\angle CEF$

### Proof:

Step 1.  $AO = BO$  and  $BO = CO \Rightarrow O$  is the circumcenter of  $ABC$ .

Step 2.  $O$  is the circumcenter of  $ABC$  and  $B, C, O$  are collinear  $\Rightarrow AB$  is perpendicular to  $AC$ .

Step 3.  $AD = BD$  and  $AO = BO \Rightarrow AB$  is perpendicular to  $DO$ .

Step 4.  $AO = BO$  and  $BO = DO \Rightarrow AO = DO$ .

Step 5.  $AO = DO \Rightarrow \angle ADO = \angle OAD$ .

Step 6.  $A, C, J$  are collinear,  $\angle ADO = \angle OAD$ ,  $AD$  is parallel to  $JO$ ,  $AB$  is perpendicular to  $AC$  and  $AB$  is perpendicular to  $DO \Rightarrow \angle AJO = \angle JOA$ .

Step 7.  $\angle AJO = \angle JOA \Rightarrow AJ = AO$ .

Step 8.  $\angle EAO = \angle AOE$  and  $\angle AEO = \angle AEO \Rightarrow \frac{AO}{AE} = \frac{OA}{OE}$ .

Step 9.  $\angle FAO = \angle AOF \Rightarrow \frac{AO}{AF} = \frac{OA}{OF}$ .

Step 10.  $AJ = AO$ ,  $AO = BO$ ,  $BO = EO$ ,  $BO = FO$ ,  $\frac{AO}{AE} = \frac{OA}{OE}$  and  $\frac{AO}{AF} = \frac{OA}{OF} \Rightarrow E, F, J, O$  are cyclic.

Step 11.  $E, F, J, O$  are cyclic  $\Rightarrow \angle FEJ = \angle FOJ$ .

Step 12.  $AE = EO$ ,  $BO = EO$  and  $BO = FO \Rightarrow AE = FO$ .

Step 13.  $AF = FO$ ,  $BO = EO$  and  $BO = FO \Rightarrow AF = EO$ .

Step 14.  $AE = FO$  and  $AF = EO \Rightarrow AE$  is parallel to  $FO$ .

Step 15.  $AO = BO$ ,  $BO = DO$ ,  $BO = EO$  and  $BO = FO \Rightarrow A, D, E, F$  are cyclic.

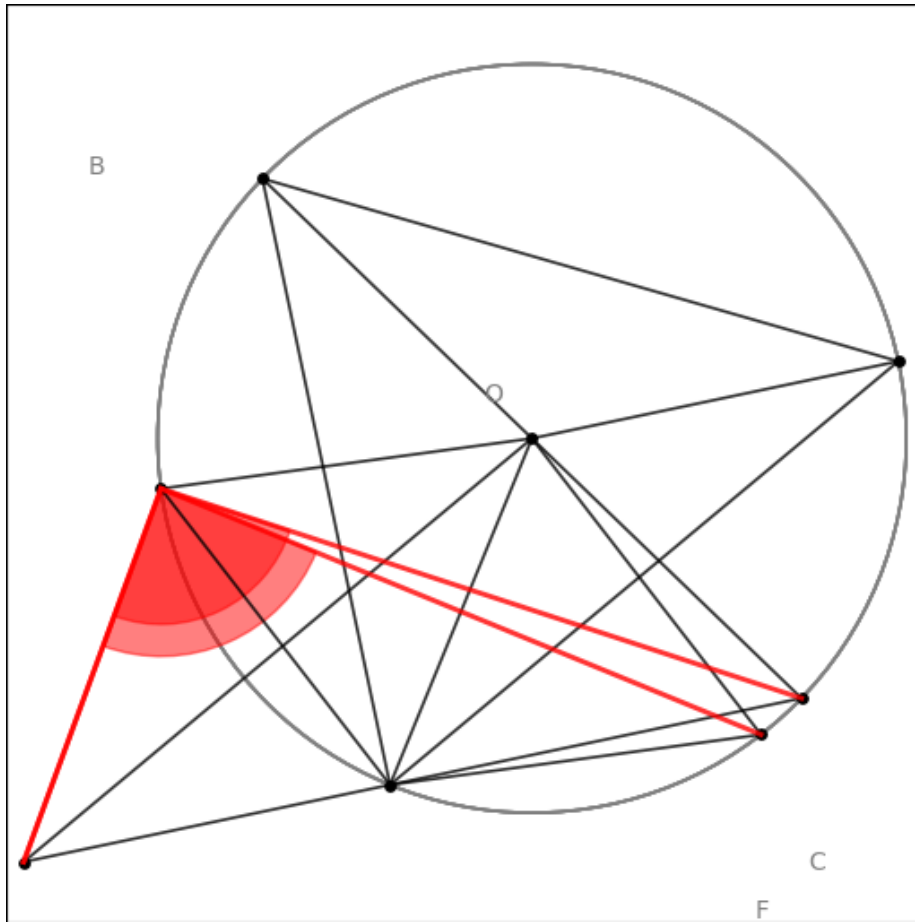

Figure 3: imo 2002 p2a

- Step 16.  $A, D, E, F$  are cyclic  $\Rightarrow \angle ADF = \angle AEF$ .
- Step 17.  $AO = BO, BO = CO, BO = EO$  and  $BO = FO \Rightarrow A, C, E, F$  are cyclic.
- Step 18.  $A, C, E, F$  are cyclic  $\Rightarrow \angle ACE = \angle AFE$ .
- Step 19.  $AE = EO, AF = FO, BO = EO$  and  $BO = FO \Rightarrow AE = AF$ .
- Step 20.  $AE = AF \Rightarrow \angle AEF = \angle EFA$ .
- Step 21.  $BO = DO$  and  $BO = FO \Rightarrow DO = FO$ .
- Step 22.  $DO = FO \Rightarrow \angle DFO = \angle ODF$ .
- Step 23.  $\angle ACE = \angle AFE, \angle ADF = \angle AEF$  and  $\angle AEF = \angle EFA \Rightarrow \angle ADF = \angle ECA$ .
- Step 24.  $\angle DFO = \angle ODF, AB$  is perpendicular to  $AC$  and  $AB$  is perpendicular to  $DO \Rightarrow \angle(AC, DF) = \angle DFO$ .
- Step 25.  $\angle(AC, DF) = \angle DFO$  and  $\angle ADF = \angle ECA \Rightarrow \angle(AD, FO) =$

$\angle(CE, DF)$ .

Step 26.  $A, C, J$  are collinear,  $AD$  is parallel to  $JO$ ,  $AB$  is perpendicular to  $AC$  and  $AB$  is perpendicular to  $DO \Rightarrow \angle JAD = \angle DOJ$ .

Step 27.  $AD$  is parallel to  $JO \Rightarrow \angle ADJ = \angle OJD$ .

Step 28.  $\angle JAD = \angle DOJ$  and  $\angle ADJ = \angle OJD \Rightarrow AJ = DO$ .

Step 29.  $A, C, J$  are collinear,  $AE$  is parallel to  $FO$ ,  $AB$  is perpendicular to  $AC$  and  $AB$  is perpendicular to  $DO \Rightarrow \angle JAE = \angle DOF$ .

Step 30.  $AE = FO$ ,  $AJ = DO$  and  $\angle JAE = \angle DOF \Rightarrow \angle(AE, FO) = \angle(EJ, DF)$ .

Step 31.  $\angle(AD, FO) = \angle(CE, DF)$ ,  $\angle(AE, FO) = \angle(EJ, DF)$ ,  $\angle FEJ = \angle FOJ$ ,  $AD$  is parallel to  $JO$  and  $AE$  is parallel to  $FO \Rightarrow EJ$  is the bisector of  $\angle CEF$

■

## 2.4 IMO 2002 P2B

**Original:**

Let  $BC$  be a diameter of circle  $W$  with center  $O$ . Let  $A$  be a point of circle  $W$  such that  $0^\circ < \angle AOB < 120^\circ$ . Let  $D$  be the midpoint of arc  $AB$  not containing  $C$ . Line  $l$  passes through  $O$  and is parallel to line  $AD$ . Line  $l$  intersects line  $AC$  at  $J$ . The perpendicular bisector of segment  $OA$  intersects circle  $W$  at  $E$  and  $F$ . Prove that  $CJ$  is the angle bisector of angle  $ECF$ .

**Translated:**

Let  $B$  and  $C$  be any two distinct points. Define point  $O$  such that  $BO = CO$ . Let  $A$  be any point on circle  $(O, B)$ . Define point  $E$  as the circumcenter of triangle  $BAO$ . Define point  $F$  as the circumcenter of triangle  $CAO$ . Let  $J$  be any point on line  $AC$ . Prove that  $CJ$  is the bisector of  $\angle ECF$

**Proof:**

Step 1.  $AO = BO$ ,  $BO = CO$ ,  $BO = EO$  and  $BO = FO \Rightarrow A, C, E, F$  are cyclic.

Step 2.  $A, C, E, F$  are cyclic  $\Rightarrow \angle ACF = \angle AEF$  and  $\angle ACE = \angle AFE$ .

Step 3.  $AE = EO$ ,  $AF = FO$ ,  $BO = EO$  and  $BO = FO \Rightarrow AE = AF$ .

Step 4.  $AE = AF \Rightarrow \angle AEF = \angle EFA$ .

Step 5.  $A, C, J$  are collinear,  $\angle ACE = \angle AFE$ ,  $\angle ACF = \angle AEF$  and  $\angle AEF = \angle EFA \Rightarrow CJ$  is the bisector of  $\angle ECF$

■

## 2.5 IMO 2003 P4

**Original:**

Let  $ABCD$  be a cyclic quadrilateral. Let  $P, Q$  and  $R$  be the feet of perpendiculars from  $D$  to lines  $BC, CA$  and  $AB$  respectively. Show that  $PQ = QR$  if the bisectors of angles  $ABC$  and  $ADC$  meet on segment  $AC$ .

**Translated:**

Let  $ABC$  be a triangle. Define point  $O$  as the circumcenter of triangle  $CBA$ . Define point  $B_1$  on circle  $(O, A)$  such that  $\angle B_1AC = \angle ACB_1$ . Define

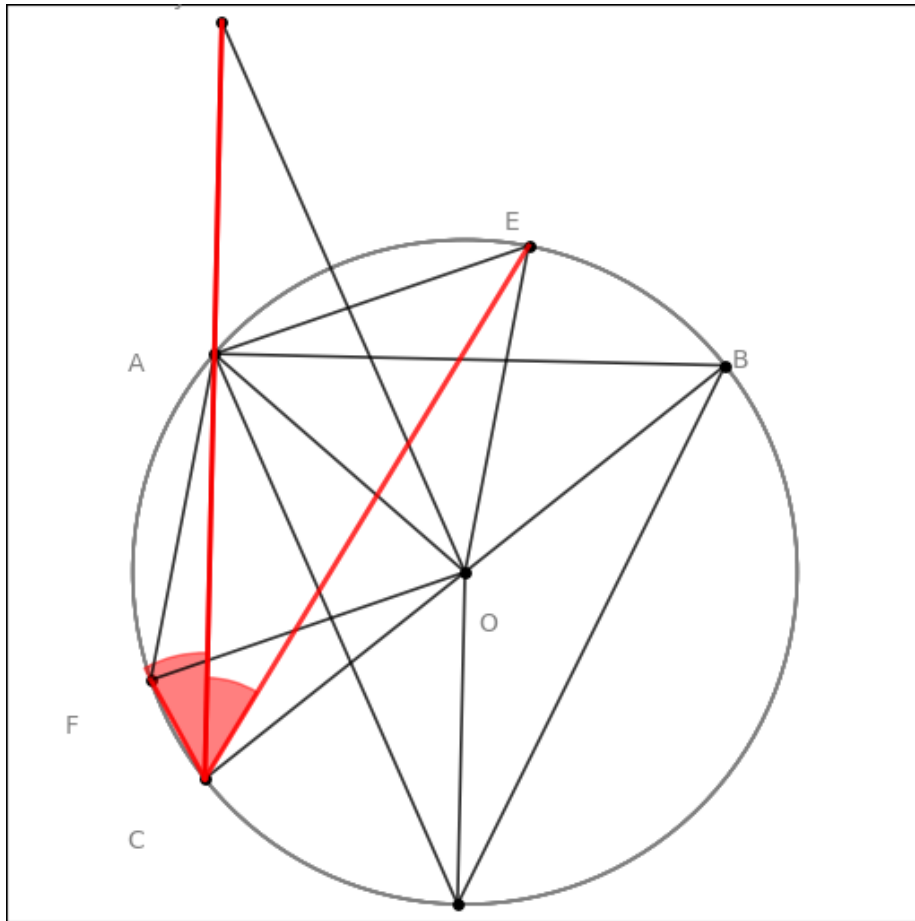

Figure 4: imo 2002 p2b

point  $D_1$  on circle  $(O, A)$  such that  $\angle ACD_1 = \angle D_1AC$ . Define point  $X$  as the intersection of lines  $AC$  and  $BB_1$ . Define point  $D$  as the intersection of circle  $(O, A)$  and line  $D_1X$ . Define point  $P$  as the foot of  $D$  on line  $BC$ . Define point  $Q$  as the foot of  $D$  on line  $AC$ . Define point  $R$  as the foot of  $D$  on line  $AB$ . Prove that  $PQ = QR$

**Proof:**

Step 1.  $A, C, Q$  are collinear,  $B, C, P$  are collinear,  $AC$  is perpendicular to  $DQ$  and  $BC$  is perpendicular to  $DP \Rightarrow \angle CPD = \angle CQD$ .

Step 2.  $\angle CPD = \angle CQD \Rightarrow C, D, P, Q$  are cyclic.

Step 3.  $C, D, P, Q$  are cyclic  $\Rightarrow \angle CDQ = \angle CPQ$ .

Step 4.  $AO = BO, AO = B_1O$  and  $BO = CO \Rightarrow A, B, B_1, C$  are cyclic.

Step 5.  $AO = BO, AO = B_1O, AO = DO$  and  $A, B, B_1, C$  are cyclic  $\Rightarrow A, B, C, D$  are cyclic.

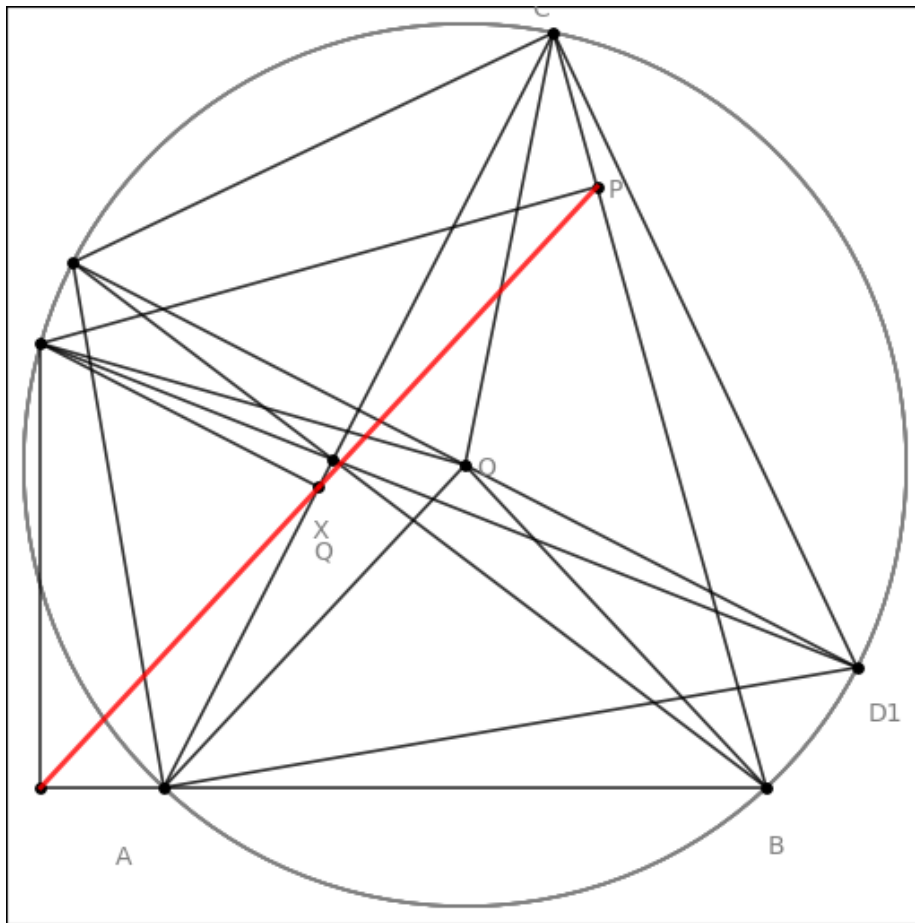

Figure 5: imo 2003 p4

Step 6.  $A, B, C, D$  are cyclic  $\Rightarrow \angle BAD = \angle BCD, \angle ACB = \angle ADB$  and  $\angle BAC = \angle BDC$ .

Step 7.  $A, C, X$  are collinear and  $AC$  is perpendicular to  $DQ \Rightarrow AX$  is perpendicular to  $DQ$ .

Step 8.  $B, C, P$  are collinear and  $BC$  is perpendicular to  $DP \Rightarrow BP$  is perpendicular to  $DP$ .

Step 9.  $AX$  is perpendicular to  $DQ$  and  $BP$  is perpendicular to  $DP \Rightarrow \angle (AX, BP) = \angle QDP$ .

Step 10.  $B, C, P$  are collinear,  $\angle BAD = \angle BCD$  and  $\angle CDQ = \angle CPQ \Rightarrow \angle BAD = \angle PQD$ .

Step 11.  $A, C, X$  are collinear,  $B, C, P$  are collinear,  $\angle (AX, BP) = \angle QDP$  and  $\angle ACB = \angle ADB \Rightarrow \angle ADB = \angle QDP$ .

Step 12.  $\angle ADB = \angle QDP$  and  $\angle BAD = \angle PQD \Rightarrow \frac{BA}{BD} = \frac{PQ}{PD}$ .



Step 13.  $A, B, R$  are collinear,  $A, C, Q$  are collinear,  $AB$  is perpendicular to  $DR$  and  $AC$  is perpendicular to  $DQ \Rightarrow \angle AQD = \angle ARD$ .

Step 14.  $\angle AQD = \angle ARD \Rightarrow A, D, Q, R$  are cyclic.

Step 15.  $A, D, Q, R$  are cyclic  $\Rightarrow \angle ADQ = \angle ARQ$ .

Step 16.  $A, B, R$  are collinear and  $AB$  is perpendicular to  $DR \Rightarrow AR$  is perpendicular to  $DR$ .

Step 17.  $AR$  is perpendicular to  $DR$  and  $AX$  is perpendicular to  $DQ \Rightarrow \angle XAR = \angle QDR$ .

Step 18.  $A, B, R$  are collinear,  $\angle BAD = \angle BCD$  and  $\angle ADQ = \angle ARQ \Rightarrow \angle BCD = \angle RQD$ .

Step 19.  $A, B, R$  are collinear,  $A, C, X$  are collinear,  $\angle BAC = \angle BDC$  and  $\angle XAR = \angle QDR \Rightarrow \angle BDC = \angle RDQ$ .

Step 20.  $\angle BDC = \angle RDQ$  and  $\angle BCD = \angle RQD \Rightarrow \frac{BC}{BD} = \frac{RQ}{RD}$ .

Step 21.  $AR$  is perpendicular to  $DR$  and  $BP$  is perpendicular to  $DP \Rightarrow \angle (AR, BP) = \angle RDP$ .

Step 22.  $A, B, R$  are collinear,  $B, C, P$  are collinear and  $\angle BAD = \angle BCD \Rightarrow \angle DAR = \angle DCP$ .

Step 23.  $B, C, P$  are collinear and  $\angle (AR, BP) = \angle RDP \Rightarrow \angle ARD = \angle CPD$ .

Step 24.  $\angle DAR = \angle DCP$  and  $\angle ARD = \angle CPD \Rightarrow \frac{DA}{DR} = \frac{DC}{DP}$ .

Step 25.  $AO = BO, AO = B_1O, AO = DO, AO = D_1O$  and  $A, B, B_1, C$  are cyclic  $\Rightarrow A, C, D, D_1$  are cyclic.

Step 26.  $A, C, D, D_1$  are cyclic  $\Rightarrow \angle ACD_1 = \angle ADD_1$  and  $\angle ACD = \angle AD_1D$ .

Step 27.  $D, D_1, X$  are collinear,  $\angle ACD = \angle AD_1D, \angle ACD_1 = \angle D_1AC$  and  $\angle ACD_1 = \angle ADD_1 \Rightarrow DX$  is the bisector of  $\angle ADC$ .

Step 28.  $A, C, X$  are collinear and  $DX$  is the bisector of  $\angle ADC \Rightarrow \frac{DA}{DC} = \frac{XA}{XC}$ .

Step 29.  $A, B, B_1, C$  are cyclic  $\Rightarrow \angle AB_1B = \angle ACB$  and  $\angle ABB_1 = \angle ACB_1$ .

Step 30.  $B, B_1, X$  are collinear,  $\angle B_1AC = \angle ACB_1, \angle ABB_1 = \angle ACB_1$  and  $\angle AB_1B = \angle ACB \Rightarrow BX$  is the bisector of  $\angle ABC$ .

Step 31.  $A, C, X$  are collinear and  $BX$  is the bisector of  $\angle ABC \Rightarrow \frac{BA}{BC} = \frac{XA}{XC}$ .

Step 32.  $\frac{BA}{BC} = \frac{XA}{XC}, \frac{BA}{BD} = \frac{PQ}{PD}, \frac{BC}{BD} = \frac{RQ}{RD}, \frac{DA}{DC} = \frac{XA}{XC}$  and  $\frac{DA}{DR} = \frac{DC}{DP} \Rightarrow$  by ratio chasing:  $PQ = QR$

■

## 2.6 IMO 2004 P1

### Original:

Let  $ABC$  be a triangle with  $AB = AC$ . The circle with diameter  $BC$  intersects the sides  $AB$  and  $AC$  at  $M$  and  $N$  respectively. Denote by  $O$  the midpoint of the side  $BC$ . The bisectors of the angles  $\angle BAC$  and  $\angle MON$  intersect at  $R$ . Prove that the circumcircles of the triangles  $BMR$  and  $CNR$  have a common point lying on the side  $BC$ .

### Translated:

Let  $ABCO$  be a quadrilateral. Define point  $M$  as the intersection of circle  $(O, B)$  and line  $AB$ . Define point  $N$  as the intersection of circle  $(O, B)$  and line  $AC$ . Define point  $R$  such that  $AR$  is the bisector of  $\angle BAC$  and  $OR$  is the bisector of  $\angle MON$ . Define point  $O_1$  as the circumcenter of triangle  $RBM$ . Define point  $O_2$  as the circumcenter of triangle  $RCN$ . Define point  $P$  as the intersection of circles  $(O_1, R)$  and  $(O_2, R)$ . Prove that  $B, C, P$  are collinear

**Proof:**

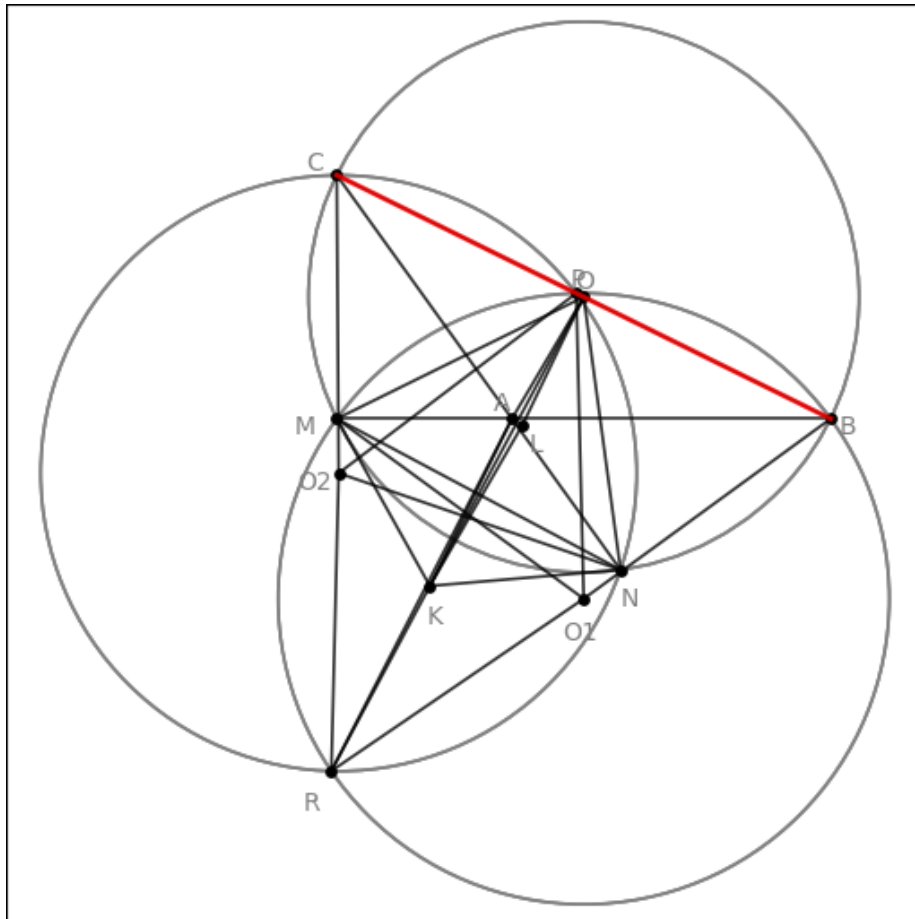

Figure 6: imo 2004 p1

Construct point  $K$  such that  $KM = KN$ .

Construct point  $L$  as the intersection of circles  $(K, A)$  and  $(O, A)$ .

Step 1.  $AK = KL$  and  $AO = LO \Rightarrow AL$  is perpendicular to  $KO$ .

Step 2.  $AK = KL$  and  $AO = LO \Rightarrow KO$  is the bisector of  $\angle AKL$ .

Step 3.  $BO = MO$  and  $BO = NO \Rightarrow MO = NO$ .

Step 4.  $KM = KN$  and  $MO = NO \Rightarrow KO$  is perpendicular to  $MN$ .

- Step 5.  $MO = NO$  and  $OR$  is the bisector of  $\angle MON \Rightarrow MR = NR$ .
- Step 6.  $MO = NO$  and  $MR = NR \Rightarrow MN$  is perpendicular to  $OR$ .
- Step 7.  $AL$  is perpendicular to  $KO$  and  $KO$  is perpendicular to  $MN \Rightarrow AL$  is parallel to  $MN$ .
- Step 8.  $KO$  is the bisector of  $\angle AKL$ ,  $AL$  is parallel to  $MN$ ,  $AL$  is perpendicular to  $KO$  and  $MN$  is perpendicular to  $OR \Rightarrow KR$  is the bisector of  $\angle AKL$ .
- Step 9.  $AK = KL$  and  $KR$  is the bisector of  $\angle AKL \Rightarrow AR = LR$ .
- Step 10.  $MO = NO \Rightarrow \angle MNO = \angle OMN$ .
- Step 11.  $AO = LO \Rightarrow \angle ALO = \angle OAL$ .
- Step 12.  $\angle ALO = \angle OAL$ ,  $\angle MNO = \angle OMN$  and  $AL$  is parallel to  $MN \Rightarrow$  by angle chasing:  $\angle AOM = \angle NOL$  and  $\angle AON = \angle MOL$ .
- Step 13.  $AO = LO$ ,  $MO = NO$  and  $\angle AOM = \angle NOL \Rightarrow AM = LN$ .
- Step 14.  $AM = LN$ ,  $AR = LR$  and  $MR = NR \Rightarrow \angle MAR = \angle RLN$ .
- Step 15.  $A, B, M$  are collinear,  $A, C, N$  are collinear,  $AR$  is the bisector of  $\angle BAC$  and  $\angle MAR = \angle RLN \Rightarrow \angle NAR = \angle NLR$ .
- Step 16.  $\angle NAR = \angle NLR \Rightarrow A, L, N, R$  are cyclic.
- Step 17.  $AO = LO$ ,  $MO = NO$  and  $\angle AON = \angle MOL \Rightarrow AN = LM$ .
- Step 18.  $AN = LM$ ,  $AR = LR$  and  $MR = NR \Rightarrow \angle RAN = \angle MLR$ .
- Step 19.  $A, B, M$  are collinear,  $A, C, N$  are collinear,  $AR$  is the bisector of  $\angle BAC$  and  $\angle RAN = \angle MLR \Rightarrow \angle MAR = \angle MLR$ .
- Step 20.  $\angle MAR = \angle MLR \Rightarrow A, L, M, R$  are cyclic.
- Step 21.  $A, L, M, R$  are cyclic and  $A, L, N, R$  are cyclic  $\Rightarrow A, M, N, R$  are cyclic.
- Step 22.  $A, M, N, R$  are cyclic  $\Rightarrow \angle MAN = \angle MRN$ .
- Step 23.  $BO_1 = MO_1$ ,  $MO_1 = O_1R$  and  $O_1P = O_1R \Rightarrow B, M, P, R$  are cyclic.
- Step 24.  $B, M, P, R$  are cyclic  $\Rightarrow \angle BMR = \angle BPR$ .
- Step 25.  $CO_2 = NO_2$ ,  $NO_2 = O_2R$  and  $O_2P = O_2R \Rightarrow C, N, P, R$  are cyclic.
- Step 26.  $C, N, P, R$  are cyclic  $\Rightarrow \angle NCP = \angle NRP$ .
- Step 27.  $A, B, M$  are collinear,  $A, C, N$  are collinear,  $\angle MAN = \angle MRN$ ,  $\angle NCP = \angle NRP$  and  $\angle BMR = \angle BPR \Rightarrow \angle BPR = \angle CPR$ .
- Step 28.  $\angle BPR = \angle CPR \Rightarrow BP$  is parallel to  $CP$ .
- Step 29.  $BP$  is parallel to  $CP \Rightarrow B, C, P$  are collinear
- 

## 2.7 IMO 2004 P5A

### Original:

In a convex quadrilateral  $ABCD$ , the diagonal  $BD$  bisects neither the angle  $ABC$  nor the angle  $CDA$ . The point  $P$  lies inside  $ABCD$  and satisfies  $\angle PBC = \angle DBA$  and  $\angle PDC = \angle BDA$ . Prove that  $AP=CP$  given  $ABCD$  is a cyclic quadrilateral.

### Translated:

Let  $ABC$  be a triangle. Define point  $O$  as the circumcenter of triangle  $CBA$ . Let  $D$  be any point on circle  $(O, A)$ . Define point  $P$  such that  $\angle ABD = \angle PBC$  and  $\angle ADB = \angle PDC$ . Prove that  $AP = CP$

**Proof:**

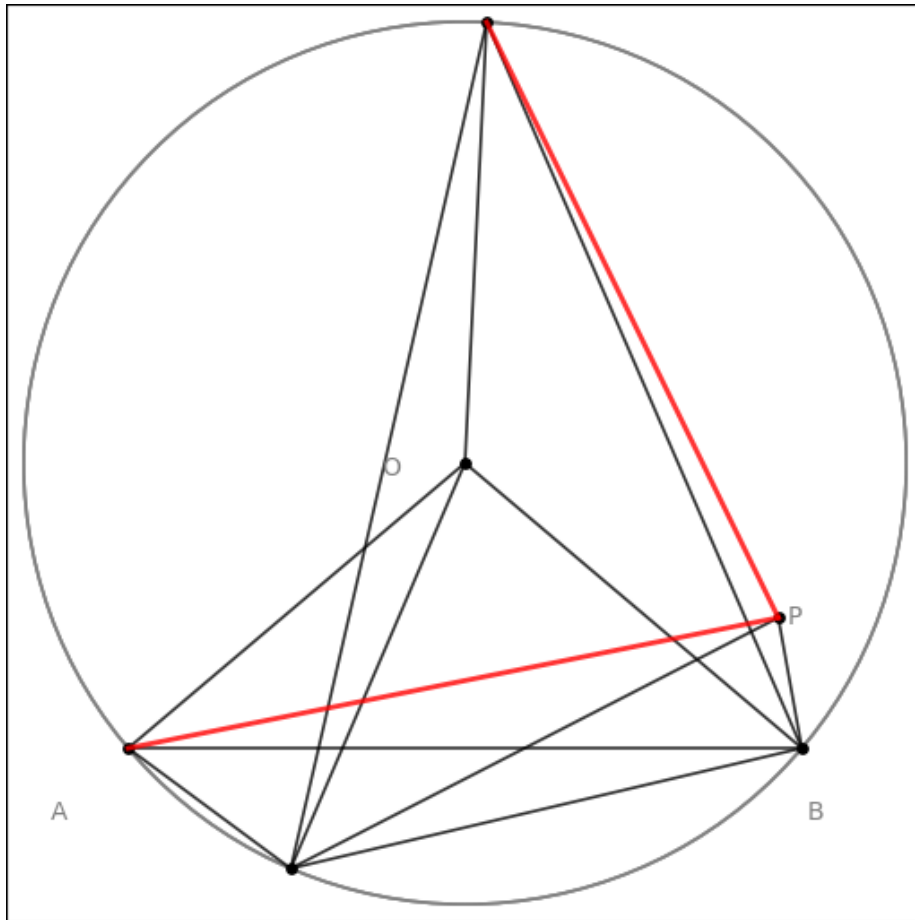

Figure 7: imo 2004 p5a

- Step 1.  $AO = BO, AO = DO$  and  $BO = CO \Rightarrow A, B, C, D$  are cyclic.
- Step 2.  $A, B, C, D$  are cyclic  $\Rightarrow \angle BAD = \angle BCD$  and  $\angle BAC = \angle BDC$ .
- Step 3.  $AO = BO, AO = DO$  and  $BO = CO \Rightarrow CO = DO$ .
- Step 4.  $CO = DO \Rightarrow \angle CDO = \angle OCD$ .
- Step 5.  $BO = CO \Rightarrow \angle BCO = \angle OBC$ .
- Step 6.  $\angle BAD = \angle BCD, \angle ABD = \angle PBC, \angle BCO = \angle OBC, \angle ADB = \angle PDC$  and  $\angle CDO = \angle OCD \Rightarrow$  by angle chasing:  $\angle BOD = \angle BPD$ .
- Step 7.  $\angle BOD = \angle BPD \Rightarrow B, D, O, P$  are cyclic.
- Step 8.  $B, D, O, P$  are cyclic  $\Rightarrow \angle BDP = \angle BOP$ .

- Step 9.  $AO = BO$  and  $BO = CO \Rightarrow AO = CO$ .  
 Step 10.  $AO = CO \Rightarrow \angle ACO = \angle OAC$ .  
 Step 11.  $AO = BO \Rightarrow \angle ABO = \angle OAB$ .  
 Step 12.  $\angle BAC = \angle BDC$ ,  $\angle BAD = \angle BCD$ ,  $\angle ABO = \angle OAB$ ,  $\angle ACO = \angle OAC$ ,  $\angle BCO = \angle OBC$ ,  $\angle ADB = \angle PDC$  and  $\angle BDP = \angle BOP \Rightarrow$  by angle chasing:  $OP$  is the bisector of  $\angle AOC$ .  
 Step 13.  $AO = CO$  and  $OP$  is the bisector of  $\angle AOC \Rightarrow AP = CP$

■

## 2.8 IMO 2005 P5A

### Original:

Let  $ABCD$  be a fixed convex quadrilateral with  $BC = DA$  and  $BCDA$ . Let two variable points  $E$  and  $F$  lie on the sides  $BC$  and  $DA$ , respectively, and satisfy  $BE = DF$ . The lines  $AC$  and  $BD$  meet at  $P$ , the lines  $BD$  and  $EF$  meet at  $Q$ , the lines  $EF$  and  $AC$  meet at  $R$ . Let  $O_1$  and  $O_2$  be the circumcircle of triangles  $APD$  and  $BPC$  respectively, and  $M$  be the second intersection of the circles  $(O_1, P)$  and  $(O_2, P)$ . Prove that the circumcircles of the triangles  $PQR$ , as  $E$  and  $F$  vary, always go through  $M$ .

### Translated:

Let  $ABC$  be a triangle. Define point  $D$  such that  $AD = BC$ . Let  $E$  be any point on line  $BC$ . Define point  $F$  on line  $AD$  such that  $BE = DF$ . Define point  $P$  as the intersection of lines  $AC$  and  $BD$ . Define point  $Q$  as the intersection of lines  $BD$  and  $EF$ . Define point  $R$  as the intersection of lines  $AC$  and  $EF$ . Define point  $O_1$  as the circumcenter of triangle  $PDA$ . Define point  $O_2$  as the circumcenter of triangle  $CBP$ . Define point  $M$  as the intersection of circles  $(O_1, P)$  and  $(O_2, P)$ . Prove that  $M, P, Q, R$  are cyclic

### Proof:

Step 1.  $AO_1 = O_1P$ ,  $DO_1 = O_1P$  and  $MO_1 = O_1P \Rightarrow A, D, M, P$  are cyclic.

Step 2.  $A, D, M, P$  are cyclic  $\Rightarrow \angle DAP = \angle DMP$  and  $\angle MAP = \angle MDP$ .

Step 3.  $BO_2 = O_2P$ ,  $CO_2 = O_2P$  and  $MO_2 = O_2P \Rightarrow B, C, M, P$  are cyclic.

Step 4.  $B, C, M, P$  are cyclic  $\Rightarrow \angle BCP = \angle BMP$  and  $\angle MBP = \angle MCP$ .

Step 5.  $A, C, P$  are collinear,  $A, D, F$  are collinear and  $\angle DAP = \angle DMP \Rightarrow \angle (AF, CP) = \angle DMP$ .

Step 6.  $B, C, E$  are collinear and  $\angle BCP = \angle BMP \Rightarrow \angle (BE, CP) = \angle BMP$ .

Step 7.  $\angle (AF, CP) = \angle DMP$  and  $\angle (BE, CP) = \angle BMP \Rightarrow \angle (AF, BE) = \angle DMB$ .

Step 8.  $A, D, F$  are collinear,  $B, C, E$  are collinear and  $\angle (AF, BE) = \angle DMB \Rightarrow \angle ADM = \angle CBM$ .

Step 9.  $A, C, P$  are collinear,  $B, D, P$  are collinear,  $\angle MAP = \angle MDP$  and  $\angle MBP = \angle MCP \Rightarrow \angle AMD = \angle CMB$ .

Step 10.  $\angle AMD = \angle CMB$  and  $\angle ADM = \angle CBM \Rightarrow \frac{AD}{BC} = \frac{MD}{MB}$ .

Step 11.  $A, D, F$  are collinear,  $B, C, E$  are collinear and  $\angle ADM = \angle CBM \Rightarrow \angle EBM = \angle FDM$ .

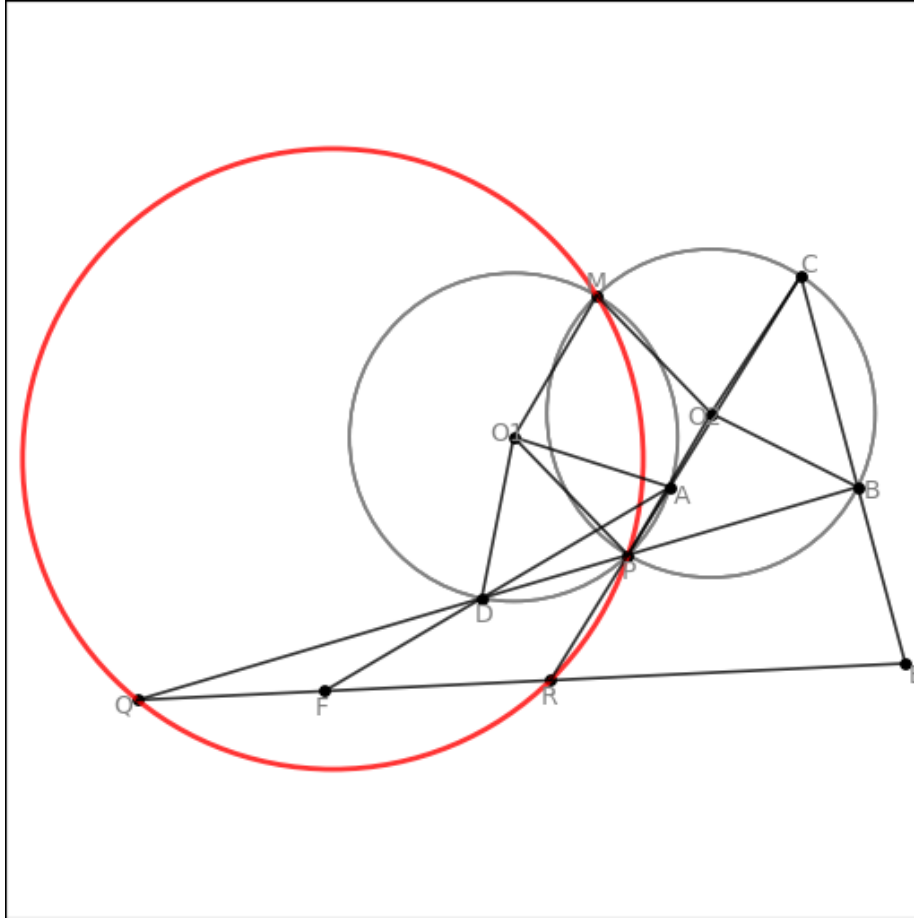

Figure 8: imo 2005 p5a

- Step 12.  $AD = BC$  and  $\frac{AD}{BC} = \frac{MD}{MB} \Rightarrow BM = DM$ .
- Step 13.  $BE = DF$ ,  $BM = DM$  and  $\angle EBM = \angle FDM \Rightarrow EM = FM$   
and  $\angle BMD = \angle EMF$ .
- Step 14.  $BM = DM$  and  $EM = FM \Rightarrow \frac{MB}{MD} = \frac{ME}{MF}$ .
- Step 15.  $\angle BMD = \angle EMF$  and  $\frac{MB}{MD} = \frac{ME}{MF} \Rightarrow \angle BDM = \angle EFM$ .
- Step 16.  $B, D, Q$  are collinear,  $E, F, Q$  are collinear and  $\angle BDM = \angle EFM$   
 $\Rightarrow \angle MDQ = \angle MFQ$ .
- Step 17.  $\angle MDQ = \angle MFQ \Rightarrow D, F, M, Q$  are cyclic.
- Step 18.  $D, F, M, Q$  are cyclic  $\Rightarrow \angle DFQ = \angle DMQ$ .
- Step 19.  $A, C, P$  are collinear,  $A, C, R$  are collinear,  $A, D, F$  are collinear,  
 $E, F, Q$  are collinear,  $E, F, R$  are collinear,  $\angle DAP = \angle DMP$  and  $\angle DFQ =$   
 $\angle DMQ \Rightarrow \angle MPR = \angle MQR$ .
- Step 20.  $\angle MPR = \angle MQR \Rightarrow M, P, Q, R$  are cyclic

## 2.9 IMO 2007 P4

### Original:

In triangle  $ABC$  the bisector of  $\angle BCA$  meets the circumcircle again at  $R$ , the perpendicular bisector of  $BC$  at  $P$ , and the perpendicular bisector of  $AC$  at  $Q$ . The midpoint of  $BC$  is  $K$  and the midpoint of  $AC$  is  $L$ . Prove that the triangles  $RPK$  and  $RQL$  have the same area.

### Translated:

Let  $ABC$  be a triangle. Define point  $O$  as the circumcenter of triangle  $CBA$ . Define point  $R$  on circle  $(O, A)$  such that  $AR = BR$  and  $\angle ABR = \angle RAB$ . Define point  $L$  as the midpoint of  $AC$ . Define point  $K$  as the midpoint of  $BC$ . Define point  $P$  as the intersection of lines  $CR$  and  $KO$ . Define point  $Q$  as the intersection of lines  $CR$  and  $LO$ . Define point  $L_1$  as the foot of  $L$  on line  $CR$ . Define point  $K_1$  as the foot of  $K$  on line  $CR$ . Prove that  $\frac{KK_1}{LL_1} = \frac{RQ}{RP}$ .

### Proof:

Step 1.  $AO = BO$ ,  $AO = OR$  and  $BO = CO \Rightarrow O$  is the circumcenter of  $ACR$ .

Step 2.  $A, C, L$  are collinear and  $AL = CL \Rightarrow L$  is the midpoint of  $AC$ .

Step 3.  $O$  is the circumcenter of  $ACR$  and  $L$  is the midpoint of  $AC \Rightarrow \angle AOL = \angle ARC$ .

Step 4.  $AO = BO$ ,  $AO = OR$  and  $BO = CO \Rightarrow O$  is the circumcenter of  $BCR$ .

Step 5.  $B, C, K$  are collinear and  $BK = CK \Rightarrow K$  is the midpoint of  $BC$ .

Step 6.  $O$  is the circumcenter of  $BCR$  and  $K$  is the midpoint of  $BC \Rightarrow \angle BOK = \angle BRC$ .

Step 7.  $AO = BO$  and  $AR = BR \Rightarrow \angle RAO = \angle OBR$ .

Step 8.  $C, K_1, R$  are collinear,  $C, L_1, R$  are collinear,  $C, P, R$  are collinear,  $C, Q, R$  are collinear,  $K, O, P$  are collinear,  $L, O, Q$  are collinear,  $\angle RAO = \angle OBR$ ,  $\angle AOL = \angle ARC$  and  $\angle BOK = \angle BRC \Rightarrow \angle KPK_1 = \angle L_1QL$ .

Step 9.  $C, K_1, R$  are collinear,  $C, L_1, R$  are collinear,  $C, P, R$  are collinear,  $C, Q, R$  are collinear,  $CR$  is perpendicular to  $KK_1$  and  $CR$  is perpendicular to  $LL_1 \Rightarrow \angle KK_1P = \angle QL_1L$ .

Step 10.  $\angle KK_1P = \angle QL_1L$  and  $\angle KPK_1 = \angle L_1QL \Rightarrow \frac{KK_1}{LL_1} = \frac{KP}{LQ}$ .

Step 11.  $AO = BO$ ,  $AO = OR$  and  $BO = CO \Rightarrow A, B, C, R$  are cyclic.

Step 12.  $A, B, C, R$  are cyclic  $\Rightarrow \angle ABR = \angle ACR$  and  $\angle BAR = \angle BCR$ .

Step 13.  $AO = BO$  and  $BO = CO \Rightarrow AO = CO$ .

Step 14.  $AL = CL$  and  $AO = CO \Rightarrow AC$  is perpendicular to  $LO$ .

Step 15.  $BK = CK$  and  $BO = CO \Rightarrow BC$  is perpendicular to  $KO$ .

Step 16.  $A, C, L$  are collinear,  $B, C, K$  are collinear,  $C, P, R$  are collinear,  $C, Q, R$  are collinear,  $\angle BAR = \angle BCR$ ,  $\angle ABR = \angle RAB$  and  $\angle ABR = \angle ACR \Rightarrow \angle KCP = \angle QCL$ .

Step 17.  $A, C, L$  are collinear,  $B, C, K$  are collinear,  $K, O, P$  are collinear,  $L, O, Q$  are collinear,  $AC$  is perpendicular to  $LO$  and  $BC$  is perpendicular to  $KO \Rightarrow \angle CLQ = \angle PKC$ .

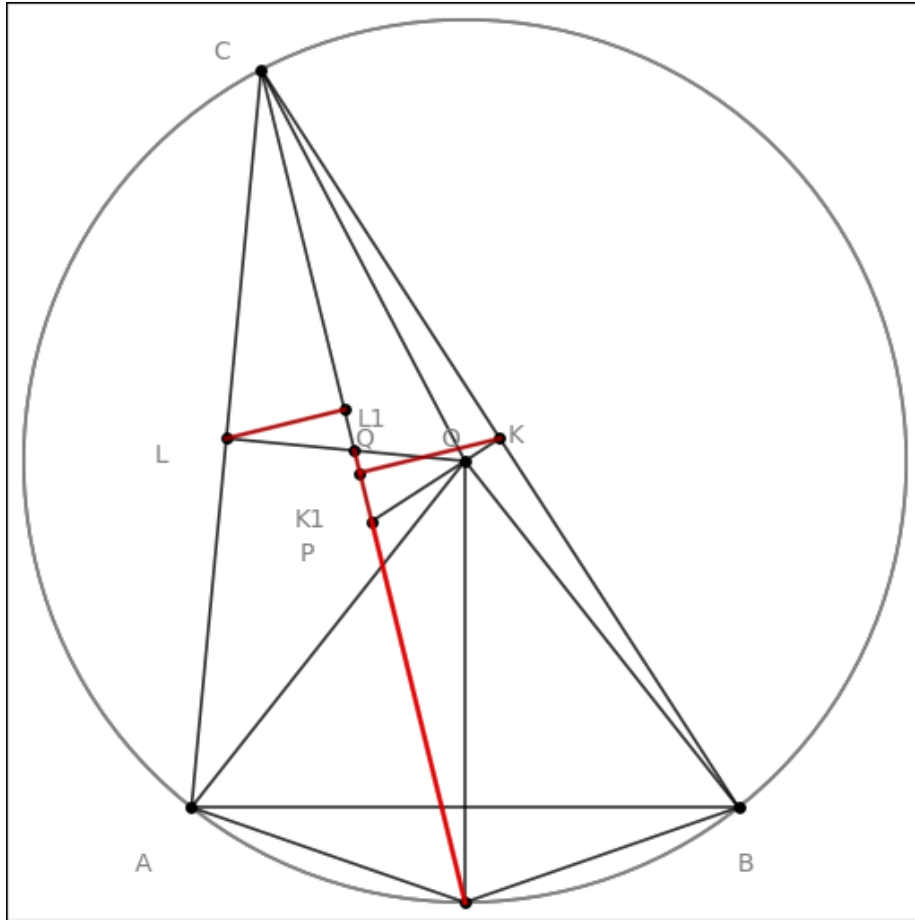

Figure 9: imo 2007 p4

Step 18.  $\angle KCP = \angle QCL$  and  $\angle CLQ = \angle PKC \Rightarrow \frac{CP}{CQ} = \frac{KP}{LQ}$ .

Step 19.  $AO = BO$ ,  $AO = OR$  and  $BO = CO \Rightarrow CO = OR$ .

Step 20.  $CO = OR \Rightarrow \angle OCR = \angle CRO$ .

Step 21.  $C, P, R$  are collinear,  $C, Q, R$  are collinear,  $K, O, P$  are collinear,  $L, O, Q$  are collinear,  $\angle RAO = \angle OBR$ ,  $\angle AOL = \angle ARC$  and  $\angle BOK = \angle BRC \Rightarrow \angle CQO = \angle OPR$ .

Step 22.  $C, P, R$  are collinear,  $C, Q, R$  are collinear and  $\angle OCR = \angle CRO \Rightarrow \angle OCQ = \angle PRO$ .

Step 23.  $\angle OCQ = \angle PRO$  and  $\angle CQO = \angle OPR \Rightarrow \frac{OC}{OR} = \frac{CQ}{PR}$ .

Step 24.  $C, P, R$  are collinear,  $C, Q, R$  are collinear,  $K, O, P$  are collinear,  $L, O, Q$  are collinear,  $\angle RAO = \angle OBR$ ,  $\angle AOL = \angle ARC$  and  $\angle BOK = \angle BRC \Rightarrow \angle CPO = \angle OQR$ .

Step 25.  $C, P, R$  are collinear,  $C, Q, R$  are collinear and  $\angle OCR = \angle CRO \Rightarrow$



$\angle PCO = \angle ORQ$ .

Step 26.  $\angle PCO = \angle ORQ$  and  $\angle CPO = \angle OQR \Rightarrow \frac{OC}{OR} = \frac{CP}{QR}$ .

Step 27.  $\frac{CP}{CQ} = \frac{KP}{LQ}$ ,  $\frac{KK_1}{LL_1} = \frac{KP}{LQ}$ ,  $\frac{OC}{OR} = \frac{CP}{QR}$  and  $\frac{OC}{OR} = \frac{CQ}{PR} \Rightarrow \frac{KK_1}{LL_1} = \frac{RQ}{RP}$

■

## 2.10 IMO 2008 P1A

**Original:**

Let  $H$  be the orthocenter of a triangle  $ABC$ . The circle  $\Gamma_A$  centered at the midpoint of  $BC$  and passing through  $H$  intersects the sideline  $BC$  at points  $A_1$  and  $A_2$ . Similarly, define the points  $B_1, B_2, C_1$ , and  $C_2$ . Prove that  $C_1, C_2, B_1, B_2$  are concyclic.

**Translated:**

Let  $ABC$  be a triangle. Define point  $H$  such that  $AH$  is perpendicular to  $BC$ . Define point  $E$  as the midpoint of  $AC$ . Define point  $F$  as the midpoint of  $AB$ . Define point  $B_1$  as the intersection of circle  $(E, H)$  and line  $AC$ . Define point  $B_2$  as the intersection of circle  $(E, H)$  and line  $AC$ . Define point  $C_1$  as the intersection of circle  $(F, H)$  and line  $AB$ . Define point  $C_2$  as the intersection of circle  $(F, H)$  and line  $AB$ . Prove that  $B_1, B_2, C_1, C_2$  are cyclic

**Proof:**

Construct point  $O$  such that  $HE = EO$  and  $HO$  is perpendicular to  $EF$ .

Step 1.  $HE = EB_1$ ,  $HE = EB_2$  and  $HE = EO \Rightarrow H, B_1, B_2, O$  are cyclic.

Step 2.  $H, B_1, B_2, O$  are cyclic  $\Rightarrow \angle B_2HO = \angle B_2B_1O$  and  $\angle HB_1B_2 = \angle HOB_2$ .

Step 3.  $HE = EB_2 \Rightarrow \angle EHB_2 = \angle HB_2E$ .

Step 4.  $A, C, E$  are collinear,  $A, C, B_1$  are collinear,  $A, C, B_2$  are collinear and  $\angle B_2HO = \angle B_2B_1O \Rightarrow \angle B_2HO = \angle (EB_2, B_1O)$ .

Step 5.  $\angle EHB_2 = \angle HB_2E$  and  $\angle B_2HO = \angle (EB_2, B_1O) \Rightarrow \angle EHB_2 = \angle HOB_1$ .

Step 6.  $A, C, E$  are collinear and  $AE = CE \Rightarrow E$  is the midpoint of  $AC$ .

Step 7.  $A, B, F$  are collinear and  $AF = BF \Rightarrow F$  is the midpoint of  $AB$ .

Step 8.  $E$  is the midpoint of  $AC$  and  $F$  is the midpoint of  $AB \Rightarrow BC$  is parallel to  $EF$ .

Step 9.  $HE = EB_1$ ,  $HE = EB_2$  and  $HE = EO \Rightarrow E$  is the circumcenter of  $B_1B_2O$ .

Step 10.  $A, C, E$  are collinear,  $A, C, B_1$  are collinear and  $A, C, B_2$  are collinear  $\Rightarrow E, B_1, B_2$  are collinear.

Step 11.  $E$  is the circumcenter of  $B_1B_2O$  and  $E, B_1, B_2$  are collinear  $\Rightarrow B_1O$  is perpendicular to  $B_2O$ .

Step 12.  $BC$  is parallel to  $EF$  and  $AH$  is perpendicular to  $BC \Rightarrow AH$  is perpendicular to  $EF$ .

Step 13.  $AH$  is perpendicular to  $EF$  and  $B_1O$  is perpendicular to  $B_2O \Rightarrow \angle (AH, B_1O) = \angle (EF, B_2O)$ .

Step 14.  $AH$  is perpendicular to  $BC$  and  $HO$  is perpendicular to  $EF \Rightarrow \angle (AH, BC) = \angle (HO, EF)$ .

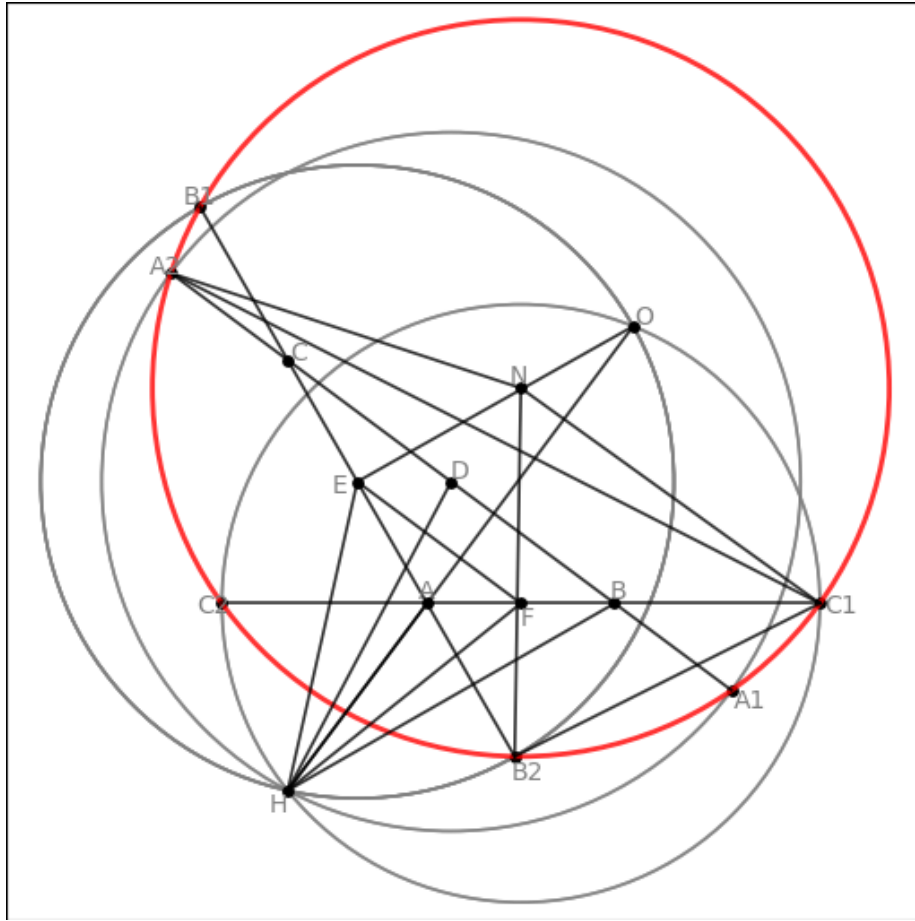

Figure 10: imo 2008 p1a

Step 15.  $\angle(AH, BC) = \angle(HO, EF)$  and  $BC$  is parallel to  $EF \Rightarrow \angle(AH, EF) = \angle(HO, EF)$ .

Step 16.  $\angle(AH, EF) = \angle(HO, EF) \Rightarrow AH$  is parallel to  $HO$ .

Step 17.  $HE = EB_1$  and  $HE = EB_2 \Rightarrow E$  is the circumcenter of  $HB_1B_2$ .

Step 18.  $E$  is the circumcenter of  $HB_1B_2$  and  $E, B_1, B_2$  are collinear  $\Rightarrow HB_1$  is perpendicular to  $HB_2$ .

Step 19.  $A, C, E$  are collinear,  $A, C, B_1$  are collinear,  $A, C, B_2$  are collinear and  $\angle HB_1B_2 = \angle HOB_2 \Rightarrow \angle(HB_1, EB_2) = \angle HOB_2$ .

Step 20.  $HB_1$  is perpendicular to  $HB_2$  and  $HO$  is perpendicular to  $EF \Rightarrow \angle B_1HB_2 = \angle(HO, EF)$ .

Step 21.  $\angle B_1HB_2 = \angle(HO, EF)$  and  $\angle(HB_1, EB_2) = \angle HOB_2 \Rightarrow \angle HB_2E = \angle(EF, B_2O)$ .

Step 22.  $HE = EB_2$  and  $HE = EO \Rightarrow EB_2 = EO$ .

- Step 23.  $EB_2 = EO \Rightarrow \angle EB_2O = \angle B_2OE$ .
- Step 24.  $\angle(AH, B_1O) = \angle(EF, B_2O)$ ,  $\angle EHB_2 = \angle HOB_1$  and  $AH$  is parallel to  $HO \Rightarrow \angle EHB_2 = \angle(EF, B_2O)$ .
- Step 25.  $\angle HB_2E = \angle(EF, B_2O)$  and  $\angle EB_2O = \angle B_2OE \Rightarrow \angle(HB_2, EF) = \angle B_2OE$ .
- Step 26.  $\angle EHB_2 = \angle(EF, B_2O)$  and  $\angle(HB_2, EF) = \angle B_2OE \Rightarrow EF$  is the bisector of  $\angle HEO$ .
- Step 27.  $HE = EO$  and  $EF$  is the bisector of  $\angle HEO \Rightarrow HF = FO$ .
- Step 28.  $HF = FC_1$ ,  $HF = FC_2$  and  $HF = FO \Rightarrow H, C_1, C_2, O$  are cyclic.
- Step 29.  $H, C_1, C_2, O$  are cyclic  $\Rightarrow \angle HC_1C_2 = \angle HOC_2$ .
- Step 30.  $AH$  is parallel to  $HO \Rightarrow A, H, O$  are collinear.
- Step 31.  $A, B, C_1$  are collinear,  $A, B, C_2$  are collinear,  $A, H, O$  are collinear and  $\angle HC_1C_2 = \angle HOC_2 \Rightarrow \angle AOC_2 = \angle HC_1A$  and  $\angle AC_2O = \angle C_1HA$ .
- Step 32.  $\angle AC_2O = \angle C_1HA$  and  $\angle AOC_2 = \angle HC_1A \Rightarrow \frac{AH}{AC_1} = \frac{AC_2}{AO}$ .
- Step 33.  $A, C, B_1$  are collinear,  $A, C, B_2$  are collinear,  $A, H, O$  are collinear and  $\angle HB_1B_2 = \angle HOB_2 \Rightarrow \angle AOB_2 = \angle HB_1A$ .
- Step 34.  $A, C, B_1$  are collinear,  $A, C, B_2$  are collinear,  $\angle HB_1B_2 = \angle HOB_2$  and  $AH$  is parallel to  $HO \Rightarrow \angle AB_2O = \angle B_1HA$ .
- Step 35.  $\angle AB_2O = \angle B_1HA$  and  $\angle AOB_2 = \angle HB_1A \Rightarrow \frac{AH}{AB_1} = \frac{AB_2}{AO}$ .
- Step 36.  $\frac{AH}{AB_1} = \frac{AB_2}{AO}$  and  $\frac{AH}{AC_1} = \frac{AC_2}{AO} \Rightarrow$  by ratio chasing:  $\frac{AB_1}{AC_2} = \frac{AC_1}{AB_2}$ .
- Step 37.  $A, B, C_1$  are collinear,  $A, B, C_2$  are collinear,  $A, C, B_1$  are collinear and  $A, C, B_2$  are collinear  $\Rightarrow \angle B_1AC_2 = \angle B_2AC_1$ .
- Step 38.  $\angle B_1AC_2 = \angle B_2AC_1$  and  $\frac{AB_1}{AC_2} = \frac{AC_1}{AB_2} \Rightarrow \angle AB_1C_2 = \angle B_2C_1A$ .
- Step 39.  $A, B, C_1$  are collinear,  $A, B, C_2$  are collinear,  $A, C, B_1$  are collinear,  $A, C, B_2$  are collinear and  $\angle AB_1C_2 = \angle B_2C_1A \Rightarrow \angle B_2B_1C_2 = \angle B_2C_1C_2$ .
- Step 40.  $\angle B_2B_1C_2 = \angle B_2C_1C_2 \Rightarrow B_1, B_2, C_1, C_2$  are cyclic
- 

## 2.11 IMO 2008 P1B

### Original:

Let  $H$  be the orthocenter of a triangle  $ABC$ . The circle  $\Gamma_A$  centered at the midpoint of  $BC$  and passing through  $H$  intersects the sideline  $BC$  at points  $A_1$  and  $A_2$ . Similarly, define the points  $B_1, B_2, C_1$ , and  $C_2$ . Prove that  $C_1, C_2, B_1, A_1$  are concyclic.

### Translated:

Let  $ABC$  be a triangle. Define point  $H$  as the orthocenter of triangle  $CBA$ . Define point  $D$  as the midpoint of  $BC$ . Define point  $E$  as the midpoint of  $AC$ . Define point  $F$  as the midpoint of  $AB$ . Define point  $A_1$  as the intersection of circle  $(D, H)$  and line  $BC$ . Define point  $A_2$  as the intersection of circle  $(D, H)$  and line  $BC$ . Define point  $B_1$  as the intersection of circle  $(E, H)$  and line  $AC$ . Define point  $B_2$  as the intersection of circle  $(E, H)$  and line  $AC$ . Define point  $C_1$  as the intersection of circle  $(F, H)$  and line  $AB$ . Define point  $C_2$  as the intersection of circle  $(F, H)$  and line  $AB$ . Prove that  $C_1, C_2, B_1, A_1$  are cyclic

### Proof:

Not solved.

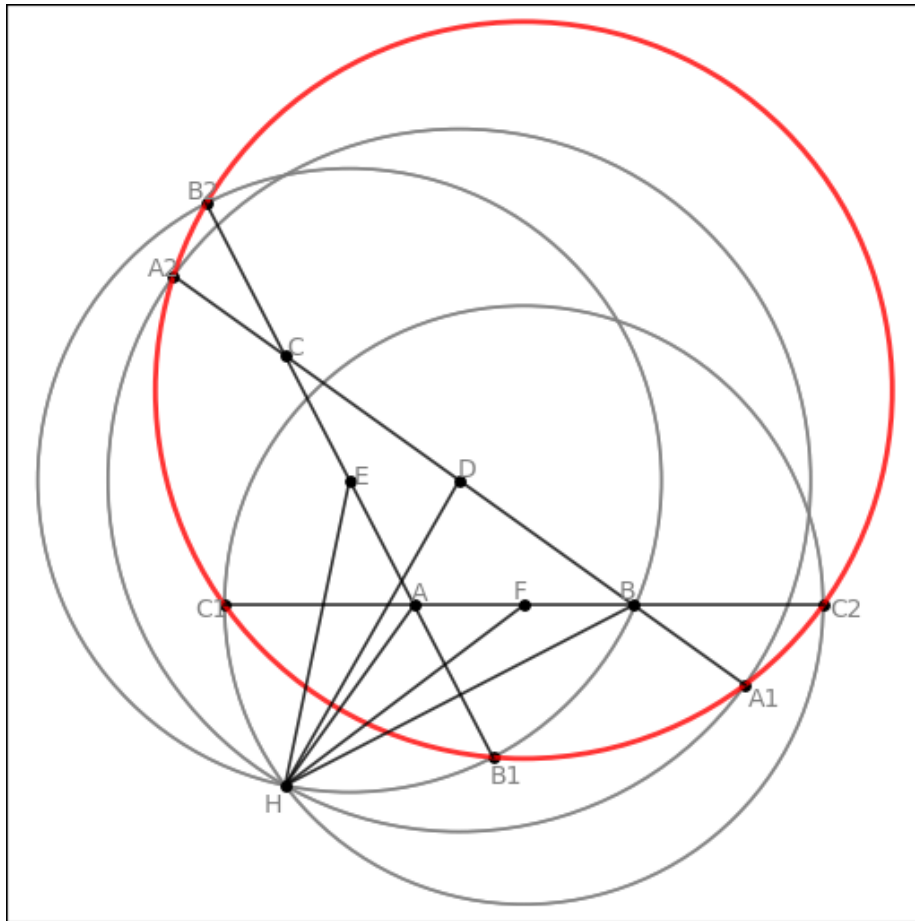

Figure 11: imo 2008 p1b

## 2.12 IMO 2008 P6

### Original:

Let  $ABCD$  be a convex quadrilateral with  $BA \neq BC$ . Denote the incircles of triangles  $ABC$  and  $ADC$  by  $W_1$  and  $W_2$  respectively. Suppose that there exists a circle  $W$  tangent to ray  $BA$  beyond  $A$  and to the ray  $BC$  beyond  $C$ , which is also tangent to the lines  $AD$  and  $CD$ . Prove that the common external tangents to  $W_1$  and  $W_2$  intersect on  $W$ .

### Translated:

Let  $XYZ$  be a triangle. Define point  $O$  as the circumcenter of triangle  $XYZ$ . Let  $W$  be any point on circle  $(O, X)$ . Define point  $A$  such that  $AX$  is perpendicular to  $OX$  and  $AZ$  is perpendicular to  $OZ$ . Define point  $B$  such that  $BW$  is perpendicular to  $OW$  and  $BZ$  is perpendicular to  $OZ$ . Define point  $C$  such that  $CW$  is perpendicular to  $OW$  and  $CY$  is perpendicular to  $OY$ . Define

point  $D$  such that  $DX$  is perpendicular to  $OX$  and  $DY$  is perpendicular to  $OY$ . Define point  $I_1$  such that  $AI_1$  is the bisector of  $\angle BAC$  and  $CI_1$  is the bisector of  $\angle ACB$ . Define point  $I_2$  such that  $AI_2$  is the bisector of  $\angle CAD$  and  $DI_2$  is the bisector of  $\angle ADC$ . Define point  $F_1$  as the foot of  $I_1$  on line  $AC$ . Define point  $F_2$  as the foot of  $I_2$  on line  $AC$ . Define points  $Q, T$  such that  $F_1I_1 = I_1Q$ ,  $F_2I_2 = I_2T$ ,  $I_1Q$  is perpendicular to  $QT$  and  $I_2T$  is perpendicular to  $QT$ . Define points  $P, S$  such that  $F_1I_1 = I_1P$ ,  $F_2I_2 = I_2S$ ,  $I_1P$  is perpendicular to  $PS$  and  $I_2S$  is perpendicular to  $PS$ . Define point  $K$  as the intersection of lines  $PS$  and  $QT$ . Prove that  $OK = OX$ .

**Proof:**

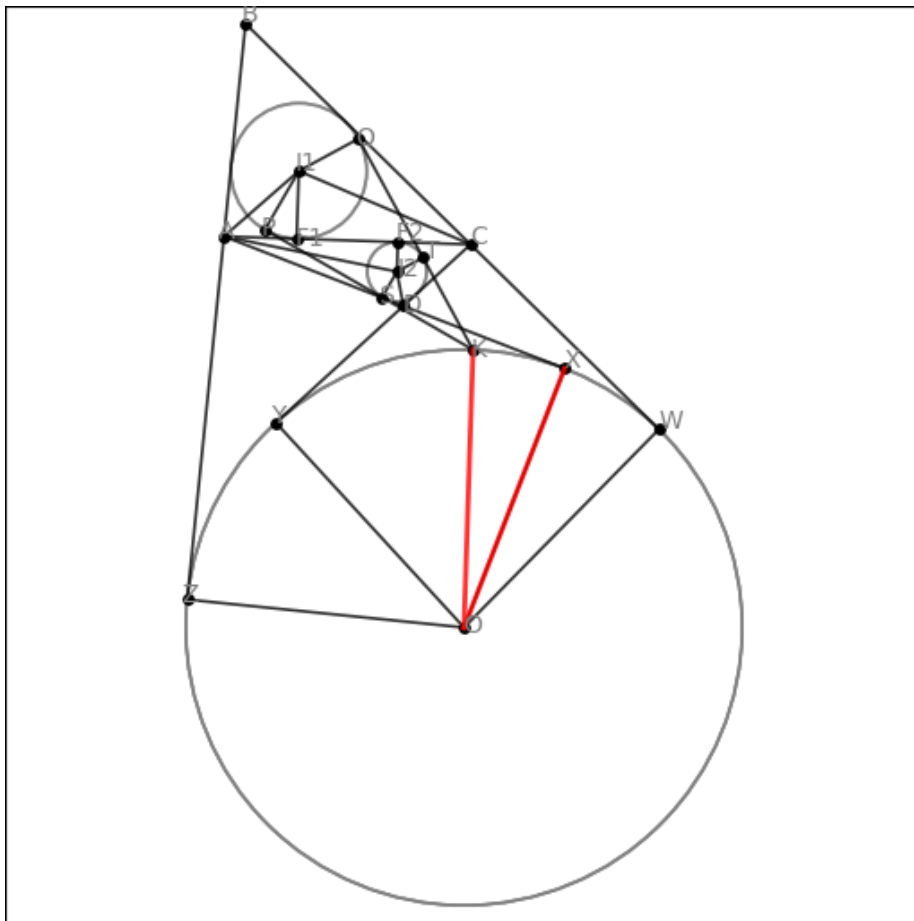

Figure 12: imo 2008 p6

Not solved.

## 2.13 IMO 2009 P2

### Original:

Let  $ABC$  be a triangle with circumcenter  $O$ . The points  $P$  and  $Q$  are interior points of the sides  $CA$  and  $AB$  respectively. Let  $K, L, M$  be the midpoints of  $BP, CQ, PQ$ , respectively, and let  $\Gamma$  be the circumcircle of triangle  $KLM$ . Suppose that  $PQ$  is tangent to  $\Gamma$ . Prove that  $OP = OQ$ .

### Translated:

Let  $MLK$  be a triangle. Define point  $W$  as the circumcenter of triangle  $LMK$ . Define point  $Q$  such that  $MW$  is perpendicular to  $MQ$ . Define point  $P$  as the mirror of  $Q$  through  $M$ . Define point  $B$  as the mirror of  $P$  through  $K$ . Define point  $C$  as the mirror of  $Q$  through  $L$ . Define point  $A$  as the intersection of lines  $QB$  and  $PC$ . Define point  $O$  as the circumcenter of triangle  $CBA$ . Prove that  $QO = PO$ .

### Proof:

Construct point  $D$  such that  $MK = LD$  and  $MD = LK$ .

Construct point  $E$  as the mirror of  $K$  through  $W$ .

Construct point  $F$  as the mirror of  $Q$  through  $D$ .

Step 1.  $M, Q, P$  are collinear and  $MQ = MP \Rightarrow M$  is the midpoint of  $QP$ .

Step 2.  $L, Q, C$  are collinear and  $LQ = LC \Rightarrow L$  is the midpoint of  $QC$ .

Step 3.  $M$  is the midpoint of  $QP$  and  $L$  is the midpoint of  $QC \Rightarrow ML$  is parallel to  $PC$ .

Step 4.  $BO = CO$  and  $BO = AO \Rightarrow CO = AO$ .

Step 5.  $CO = AO \Rightarrow \angle CAO = \angle OCA$ .

Step 6.  $K, P, B$  are collinear and  $KP = KB \Rightarrow K$  is the midpoint of  $PB$ .

Step 7.  $M$  is the midpoint of  $QP$  and  $K$  is the midpoint of  $PB \Rightarrow MK$  is parallel to  $QB$ .

Step 8.  $BO = AO \Rightarrow \angle BAO = \angle OBA$ .

Step 9.  $Q, D, F$  are collinear and  $QD = DF \Rightarrow D$  is the midpoint of  $QF$ .

Step 10.  $L$  is the midpoint of  $QC$  and  $D$  is the midpoint of  $QF \Rightarrow LD$  is parallel to  $CF$ .

Step 11.  $MK = LD$  and  $MD = LK \Rightarrow \angle MLD = \angle KML$  and  $\angle MLK = \angle DML$ .

Step 12.  $P, C, A$  are collinear,  $\angle CAO = \angle OCA$  and  $ML$  is parallel to  $PC \Rightarrow \angle (ML, AO) = \angle (CO, ML)$ .

Step 13.  $Q, B, A$  are collinear,  $\angle BAO = \angle OBA$  and  $MK$  is parallel to  $QB \Rightarrow \angle (MK, AO) = \angle (BO, MK)$ .

Step 14.  $\angle MLD = \angle KML$  and  $LD$  is parallel to  $CF \Rightarrow \angle (ML, CF) = \angle KML$ .

Step 15.  $\angle (ML, CF) = \angle KML$ ,  $\angle (ML, AO) = \angle (CO, ML)$ ,  $\angle (MK, AO) = \angle (BO, MK)$ ,  $MK$  is parallel to  $QB$  and  $LD$  is parallel to  $CF \Rightarrow$  by angle chasing:  $\angle (LD, CO) = \angle QBO$ .

Step 16.  $L, Q, C$  are collinear,  $Q, D, F$  are collinear and  $LD$  is parallel to  $CF \Rightarrow \frac{LD}{CF} = \frac{QD}{QF}$ .

Step 17.  $M, Q, P$  are collinear,  $K, P, B$  are collinear and  $MK$  is parallel to  $QB \Rightarrow \frac{MK}{QB} = \frac{PK}{PB}$ .

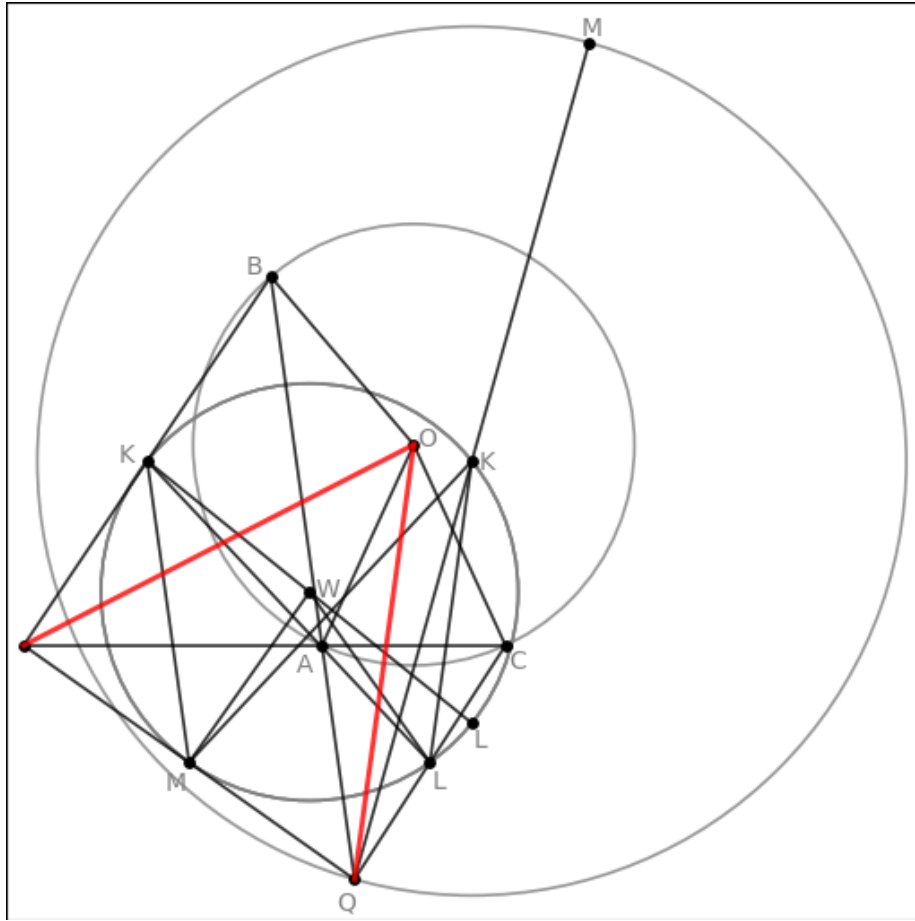

Figure 13: imo 2009 p2

Step 18.  $K$  is the midpoint of  $PB$  and  $D$  is the midpoint of  $QF \Rightarrow \frac{BK}{BP} = \frac{FD}{FQ}$ .

Step 19.  $MK = LD$ ,  $KP = KB$ ,  $QD = DF$ ,  $\frac{MK}{QB} = \frac{PK}{PB}$ ,  $\frac{LD}{CF} = \frac{QD}{QF}$  and  $\frac{BK}{BP} = \frac{FD}{FQ} \Rightarrow \frac{MK}{CF} = \frac{LD}{QB}$ .

Step 20.  $MK = LD$  and  $\frac{MK}{CF} = \frac{LD}{QB} \Rightarrow QB = CF$ .

Step 21.  $\angle(LD, CO) = \angle QBO$  and  $LD$  is parallel to  $CF \Rightarrow \angle QBO = \angle FCO$ .

Step 22.  $QB = CF$ ,  $BO = CO$  and  $\angle QBO = \angle FCO \Rightarrow \angle(QB, CF) = \angle QOF$  and  $QO = OF$ .

Step 23.  $MW = LW$ ,  $LW = KW$  and  $KW = WE \Rightarrow M, L, K, E$  are cyclic.

Step 24.  $M, L, K, E$  are cyclic  $\Rightarrow \angle MLE = \angle MKE$ .

Step 25.  $LW = KW$  and  $KW = WE \Rightarrow LW = WE$ .

Step 26.  $LW = WE \Rightarrow \angle WLE = \angle LEW$ .

Step 27.  $K, W, E$  are collinear,  $P, C, A$  are collinear,  $\angle (ML, CF) = \angle KML$ ,  $\angle MLE = \angle MKE$ ,  $\angle WLE = \angle LEW$ ,  $ML$  is parallel to  $PC$  and  $LD$  is parallel to  $CF \Rightarrow \angle WLE = \angle (LD, CA)$ .

Step 28.  $K, W, E$  are collinear,  $Q, B, A$  are collinear,  $P, C, A$  are collinear,  $\angle MLE = \angle MKE$ ,  $ML$  is parallel to  $PC$  and  $MK$  is parallel to  $QB \Rightarrow \angle LEW = \angle CAB$ .

Step 29.  $\angle WLE = \angle (LD, CA)$  and  $\angle LEW = \angle CAB \Rightarrow \angle LWE = \angle (LD, BA)$ .

Step 30.  $K, W, E$  are collinear,  $Q, B, A$  are collinear,  $\angle LWE = \angle (LD, BA)$ ,  $\angle (QB, CF) = \angle QOF$  and  $LD$  is parallel to  $CF \Rightarrow \angle LWK = \angle FOQ$ .

Step 31.  $LW = KW$  and  $QO = OF \Rightarrow \frac{WL}{WK} = \frac{OF}{OQ}$ .

Step 32.  $\angle LWK = \angle FOQ$  and  $\frac{WL}{WK} = \frac{OF}{OQ} \Rightarrow \angle LKW = \angle FQO$ .

Step 33.  $QO = OF$  and  $QD = DF \Rightarrow QF$  is perpendicular to  $OD$ .

Step 34.  $LW = KW$  and  $KW = WE \Rightarrow W$  is the circumcenter of  $LKE$ .

Step 35.  $W$  is the circumcenter of  $LKE$  and  $K, W, E$  are collinear  $\Rightarrow LK$  is perpendicular to  $LE$ .

Step 36.  $K, W, E$  are collinear,  $Q, D, F$  are collinear and  $\angle LKW = \angle FQO \Rightarrow \angle (LK, WE) = \angle (DF, QO)$ .

Step 37.  $Q, D, F$  are collinear,  $LK$  is perpendicular to  $LE$  and  $QF$  is perpendicular to  $OD \Rightarrow \angle KLE = \angle FDO$ .

Step 38.  $\angle KLE = \angle FDO$  and  $\angle (LK, WE) = \angle (DF, QO) \Rightarrow \angle LEW = \angle DOQ$ .

Step 39.  $M$  is the midpoint of  $QP$  and  $D$  is the midpoint of  $QF \Rightarrow MD$  is parallel to  $PF$ .

Step 40.  $MW = LW$  and  $LW = KW \Rightarrow W$  is the circumcenter of  $MLK$ .

Step 41.  $W$  is the circumcenter of  $MLK$  and  $MW$  is perpendicular to  $MQ \Rightarrow \angle MLK = \angle QMK$ .

Step 42.  $Q, B, A$  are collinear,  $P, C, A$  are collinear,  $\angle MLK = \angle QMK$ ,  $\angle MLK = \angle DML$ ,  $ML$  is parallel to  $PC$ ,  $MK$  is parallel to  $QB$  and  $MD$  is parallel to  $PF \Rightarrow \angle (MQ, BA) = \angle (PF, CA)$ .

Step 43.  $K, W, E$  are collinear,  $Q, B, A$  are collinear,  $P, C, A$  are collinear,  $\angle MLE = \angle MKE$ ,  $ML$  is parallel to  $PC$  and  $MK$  is parallel to  $QB \Rightarrow \angle (LE, CA) = \angle (WE, BA)$ .

Step 44.  $\angle (MQ, BA) = \angle (PF, CA)$  and  $\angle (LE, CA) = \angle (WE, BA) \Rightarrow \angle (MQ, WE) = \angle (PF, LE)$ .

Step 45.  $\angle (MQ, WE) = \angle (PF, LE)$ ,  $\angle LEW = \angle DOQ$  and  $MD$  is parallel to  $PF \Rightarrow \angle QMD = \angle QOD$ .

Step 46.  $\angle QMD = \angle QOD \Rightarrow M, Q, O, D$  are cyclic.

Step 47.  $M, Q, O, D$  are cyclic  $\Rightarrow \angle QMO = \angle QDO$ .

Step 48.  $M, Q, P$  are collinear,  $Q, D, F$  are collinear,  $\angle QMO = \angle QDO$  and  $QF$  is perpendicular to  $OD \Rightarrow MO$  is perpendicular to  $QP$ .

Step 49.  $M$  is the midpoint of  $QP$  and  $MO$  is perpendicular to  $QP \Rightarrow QO = PO$

■



## 2.14 IMO 2010 P2

### Original:

Let  $I$  be the incenter of a triangle  $ABC$  and let  $\Gamma$  be its circumcircle. Let line  $AI$  intersect  $\Gamma$  again at  $D$ . Let  $E$  be a point on arc  $BDC$  and  $F$  a point on side  $BC$  such that  $\angle BAF = \angle CAE < 1/2\angle BAC$ . Finally, let  $G$  be the midpoint of  $IF$ . Prove that  $DG$  and  $EI$  intersect on  $\Gamma$ .

### Translated:

Let  $ABC$  be a triangle. Define point  $O$  as the circumcenter of triangle  $CBA$ . Define point  $I$  such that  $AI$  is the bisector of  $\angle BAC$  and  $CI$  is the bisector of  $\angle ACB$ . Define point  $D$  as the intersection of circle  $(O, A)$  and line  $AI$ . Let  $F$  be any point on line  $BC$ . Define point  $E$  on circle  $(O, A)$  such that  $\angle BAF = \angle EAC$ . Define point  $G$  as the midpoint of  $IF$ . Define point  $K$  as the intersection of lines  $IE$  and  $DG$ . Prove that  $AO = OK$ .

### Proof:

Construct point  $H$  as the mirror of  $E$  through  $O$ .

Construct point  $L$  as the midpoint of  $AI$ .

Construct point  $M$  as the midpoint of  $BI$ .

Step 1.  $AO = BO$ ,  $AO = OD$  and  $BO = CO \Rightarrow A, B, C, D$  are cyclic.

Step 2.  $AO = BO$ ,  $AO = OD$ ,  $AO = OE$  and  $A, B, C, D$  are cyclic  $\Rightarrow A, B, C, E$  are cyclic.

Step 3.  $AO = OD$ ,  $AO = OE$  and  $OE = OH \Rightarrow A, D, E, H$  are cyclic.

Step 4.  $A, B, C, D$  are cyclic,  $A, B, C, E$  are cyclic and  $A, D, E, H$  are cyclic  $\Rightarrow A, B, D, H$  are cyclic.

Step 5.  $A, B, D, H$  are cyclic  $\Rightarrow \angle DAH = \angle DBH$  and  $\angle ABH = \angle ADH$ .

Step 6.  $A, B, C, D$  are cyclic,  $A, B, C, E$  are cyclic and  $A, D, E, H$  are cyclic  $\Rightarrow A, C, D, H$  are cyclic.

Step 7.  $A, C, D, H$  are cyclic  $\Rightarrow \angle DAH = \angle DCH$ .

Step 8.  $A, B, C, D$  are cyclic,  $A, B, C, E$  are cyclic and  $A, D, E, H$  are cyclic  $\Rightarrow B, C, D, H$  are cyclic.

Step 9.  $B, C, D, H$  are cyclic  $\Rightarrow \angle BCH = \angle BDH$ .

Step 10.  $A, I, D$  are collinear and  $\angle DAH = \angle DBH \Rightarrow \angle IAH = \angle DBH$ .

Step 11.  $A, I, D$  are collinear and  $\angle DAH = \angle DCH \Rightarrow \angle IAH = \angle DCH$ .

Step 12.  $A, I, D$  are collinear and  $\angle ABH = \angle ADH \Rightarrow \angle ABH = \angle (AI, DH)$ .

Step 13.  $AI$  is the bisector of  $\angle BAC$ ,  $\angle IAH = \angle DBH$ ,  $\angle IAH = \angle DCH$ ,  $\angle ABH = \angle (AI, DH)$ ,  $CI$  is the bisector of  $\angle ACB$  and  $\angle BCH = \angle BDH \Rightarrow$  by angle chasing:  $\angle AIC = \angle ICD$ .

Step 14.  $A, I, D$  are collinear and  $\angle AIC = \angle ICD \Rightarrow \angle CID = \angle DCI$ .

Step 15.  $\angle CID = \angle DCI \Rightarrow CD = ID$ .

Step 16.  $A, I, D$  are collinear and  $AI$  is the bisector of  $\angle BAC \Rightarrow AD$  is the bisector of  $\angle BAC$ .

Step 17.  $A, B, C, D$  are cyclic and  $AD$  is the bisector of  $\angle BAC \Rightarrow BD = CD$ .

Step 18.  $BD = CD$  and  $CD = ID \Rightarrow D$  is the circumcenter of  $BCI$ .

Step 19.  $B, I, M$  are collinear and  $BM = IM \Rightarrow M$  is the midpoint of  $BI$ .

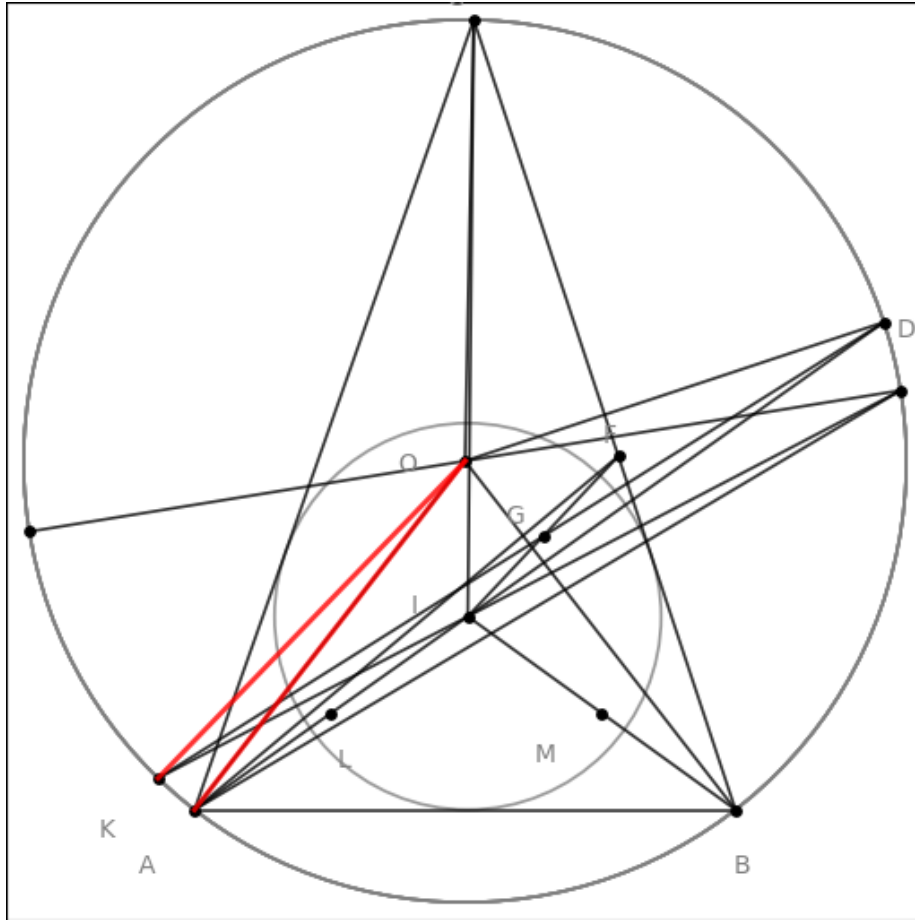

Figure 14: imo 2010 p2

Step 20.  $D$  is the circumcenter of  $BCI$  and  $M$  is the midpoint of  $BI \Rightarrow \angle BCI = \angle MDI$ .

Step 21.  $A, I, L$  are collinear and  $AL = IL \Rightarrow L$  is the midpoint of  $AI$ .

Step 22.  $L$  is the midpoint of  $AI$  and  $M$  is the midpoint of  $BI \Rightarrow AB$  is parallel to  $LM$ .

Step 23.  $A, I, D$  are collinear,  $A, I, L$  are collinear,  $CI$  is the bisector of  $\angle ACB$  and  $\angle BCI = \angle MDI \Rightarrow \angle ACI = \angle LDM$ .

Step 24.  $A, I, D$  are collinear,  $A, I, L$  are collinear,  $AI$  is the bisector of  $\angle BAC$  and  $AB$  is parallel to  $LM \Rightarrow \angle CAI = \angle DLM$ .

Step 25.  $\angle CAI = \angle DLM$  and  $\angle ACI = \angle LDM \Rightarrow \frac{IA}{IC} = \frac{ML}{MD}$  and  $\frac{CA}{CI} = \frac{DL}{DM}$ .

Step 26.  $A, B, C, E$  are cyclic  $\Rightarrow \angle ABC = \angle AEC$ .

Step 27.  $B, C, F$  are collinear and  $\angle ABC = \angle AEC \Rightarrow \angle ABF = \angle AEC$ .

Step 28.  $\angle BAF = \angle EAC$  and  $\angle ABF = \angle AEC \Rightarrow \frac{AB}{AF} = \frac{AE}{AC}$ .

Step 29.  $A, I, L$  are collinear,  $B, I, M$  are collinear and  $AB$  is parallel to  $LM \Rightarrow \frac{AB}{LM} = \frac{IA}{IL}$ .

Step 30.  $I, F, G$  are collinear and  $IG = FG \Rightarrow G$  is the midpoint of  $IF$ .

Step 31.  $G$  is the midpoint of  $IF$  and  $L$  is the midpoint of  $AI \Rightarrow AF$  is parallel to  $GL$ .

Step 32.  $A, I, L$  are collinear,  $I, F, G$  are collinear and  $AF$  is parallel to  $GL \Rightarrow \frac{AF}{GL} = \frac{IF}{IG}$ .

Step 33.  $O, E, H$  are collinear and  $OE = OH \Rightarrow O$  is the midpoint of  $EH$ .

Step 34.  $O$  is the midpoint of  $EH$  and  $L$  is the midpoint of  $AI \Rightarrow \frac{IA}{IL} = \frac{HE}{HO}$ .

Step 35.  $O$  is the midpoint of  $EH$  and  $G$  is the midpoint of  $IF \Rightarrow \frac{HO}{HE} = \frac{IG}{IF}$ .

Step 36.  $AL = IL$  and  $\frac{AB}{LM} = \frac{IA}{IL} \Rightarrow \frac{AB}{LM} = \frac{AI}{AL}$ .

Step 37.  $IG = FG$  and  $\frac{AF}{GL} = \frac{IF}{IG} \Rightarrow \frac{AF}{GL} = \frac{FI}{FG}$ .

Step 38.  $AL = IL, OE = OH$  and  $\frac{IA}{IL} = \frac{HE}{HO} \Rightarrow \frac{AL}{AI} = \frac{EO}{EH}$ .

Step 39.  $OE = OH, IG = FG$  and  $\frac{HO}{HE} = \frac{IG}{IF} \Rightarrow \frac{EO}{EH} = \frac{FG}{FI}$ .

Step 40.  $\frac{AB}{AF} = \frac{AE}{AC}, \frac{AB}{LM} = \frac{AI}{AL}, \frac{AF}{GL} = \frac{FI}{FG}, \frac{AL}{AI} = \frac{EO}{EH}, \frac{CA}{CI} = \frac{DL}{DM}, \frac{IA}{IC} = \frac{ML}{MD}$  and  $\frac{EO}{EH} = \frac{FG}{FI} \Rightarrow$  by ratio chasing:  $\frac{AI}{AE} = \frac{LG}{LD}$ .

Step 41.  $AI$  is the bisector of  $\angle BAC$  and  $\angle BAF = \angle EAC \Rightarrow$  by angle chasing:  $AI$  is the bisector of  $\angle EAF$ .

Step 42.  $A, I, D$  are collinear,  $A, I, L$  are collinear,  $AI$  is the bisector of  $\angle EAF$  and  $AF$  is parallel to  $GL \Rightarrow \angle IAE = \angle GLD$ .

Step 43.  $\angle IAE = \angle GLD$  and  $\frac{AI}{AE} = \frac{LG}{LD} \Rightarrow \angle AEI = \angle LDG$ .

Step 44.  $A, D, E, H$  are cyclic  $\Rightarrow \angle ADH = \angle AEH$ .

Step 45.  $A, I, D$  are collinear,  $A, I, L$  are collinear,  $I, E, K$  are collinear,  $D, G, K$  are collinear,  $\angle ADH = \angle AEH$  and  $\angle AEI = \angle LDG \Rightarrow \angle DKE = \angle DHE$ .

Step 46.  $\angle DKE = \angle DHE \Rightarrow D, E, K, H$  are cyclic.

Step 47.  $A, C, D, H$  are cyclic,  $A, D, E, H$  are cyclic and  $D, E, K, H$  are cyclic  $\Rightarrow C, E, K, H$  are cyclic.

Step 48.  $C, E, K, H$  are cyclic  $\Rightarrow \angle ECH = \angle EKH$ .

Step 49.  $D, E, K, H$  are cyclic  $\Rightarrow \angle EDH = \angle EKH$ .

Step 50.  $AO = BO, AO = OE, BO = CO$  and  $OE = OH \Rightarrow O$  is the circumcenter of  $CEH$ .

Step 51.  $O$  is the circumcenter of  $CEH$  and  $O, E, H$  are collinear  $\Rightarrow CE$  is perpendicular to  $CH$ .

Step 52.  $AO = OD, AO = OE$  and  $OE = OH \Rightarrow O$  is the circumcenter of  $DEH$ .

Step 53.  $O$  is the circumcenter of  $DEH$  and  $O, E, H$  are collinear  $\Rightarrow DE$  is perpendicular to  $DH$ .

Step 54.  $CE$  is perpendicular to  $CH$  and  $DE$  is perpendicular to  $DH \Rightarrow \angle ECH = \angle HDE$ .

Step 55.  $\angle ECH = \angle HDE, \angle ECH = \angle EKH$  and  $\angle EDH = \angle EKH \Rightarrow EK$  is perpendicular to  $KH$ .

Step 56.  $O$  is the midpoint of  $EH$  and  $EK$  is perpendicular to  $KH \Rightarrow OE = OK$ .

Step 57.  $AO = OE$  and  $OE = OK \Rightarrow AO = OK$

■

## 2.15 IMO 2010 P4

### Original:

Let  $P$  be a point interior to triangle  $ABC$  (with  $CA \neq CB$ ). The lines  $AP$ ,  $BP$  and  $CP$  meet again its circumcircle  $\Gamma$  at  $K$ ,  $L$ ,  $M$ , respectively. The tangent line at  $C$  to  $\Gamma$  meets the line  $AB$  at  $S$ . Show that from  $SC = SP$  follows  $MK = ML$ .

### Translated:

Let  $S$  and  $C$  be any two distinct points. Define point  $P$  on circle  $(S, C)$  such that  $\angle CPS = \angle SCP$ . Define point  $O$  such that  $CO$  is perpendicular to  $CS$ . Let  $A$  be any point on circle  $(O, C)$ . Define point  $B$  as the intersection of circle  $(O, C)$  and line  $AS$ . Define point  $M$  as the intersection of circle  $(O, C)$  and line  $CP$ . Define point  $L$  as the intersection of circle  $(O, C)$  and line  $BP$ . Define point  $K$  as the intersection of circle  $(O, C)$  and line  $AP$ . Prove that  $KM = LM$ .

### Proof:

Step 1.  $AO = CO$  and  $BO = CO \Rightarrow O$  is the circumcenter of  $ABC$ .

Step 2.  $O$  is the circumcenter of  $ABC$  and  $CO$  is perpendicular to  $CS \Rightarrow \angle BAC = \angle BCS$  and  $\angle ABC = \angle ACS$ .

Step 3.  $A, B, S$  are collinear and  $\angle BAC = \angle BCS \Rightarrow \angle SAC = \angle BCS$ .

Step 4.  $A, B, S$  are collinear and  $\angle ABC = \angle ACS \Rightarrow \angle ACS = \angle SBC$ .

Step 5.  $\angle ACS = \angle SBC$  and  $\angle SAC = \angle BCS \Rightarrow \frac{SA}{SC} = \frac{SC}{SB}$ .

Step 6.  $CS = PS$  and  $\frac{SA}{SC} = \frac{SC}{SB} \Rightarrow \frac{SA}{SP} = \frac{SP}{SB}$ .

Step 7.  $A, B, S$  are collinear  $\Rightarrow \angle ASP = \angle BSP$ .

Step 8.  $\angle ASP = \angle BSP$  and  $\frac{SA}{SP} = \frac{SP}{SB} \Rightarrow \angle SAP = \angle BPS$ .

Step 9.  $AO = CO$ ,  $BO = CO$ ,  $CO = LO$  and  $CO = MO \Rightarrow A, B, L, M$  are cyclic.

Step 10.  $A, B, L, M$  are cyclic  $\Rightarrow \angle ABL = \angle AML$ .

Step 11.  $CO = KO$ ,  $CO = LO$  and  $CO = MO \Rightarrow C, K, L, M$  are cyclic.

Step 12.  $C, K, L, M$  are cyclic  $\Rightarrow \angle CKL = \angle CML$ .

Step 13.  $CO = KO$  and  $CO = MO \Rightarrow O$  is the circumcenter of  $CKM$ .

Step 14.  $O$  is the circumcenter of  $CKM$  and  $CO$  is perpendicular to  $CS \Rightarrow \angle CKM = \angle SCM$ .

Step 15.  $C, M, P$  are collinear and  $\angle CKL = \angle CML \Rightarrow \angle CKL = \angle (CP, LM)$ .

Step 16.  $C, M, P$  are collinear,  $\angle CKM = \angle SCM$  and  $\angle CPS = \angle SCP \Rightarrow \angle CKM = \angle CPS$ .

Step 17.  $\angle CKL = \angle (CP, LM)$  and  $\angle CKM = \angle CPS \Rightarrow \angle KLM = \angle (KM, PS)$ .

Step 18.  $A, B, S$  are collinear,  $B, L, P$  are collinear,  $\angle SAP = \angle BPS$  and  $\angle ABL = \angle AML \Rightarrow \angle AML = \angle APS$ .

Step 19.  $\angle KLM = \angle (KM, PS)$  and  $\angle AML = \angle APS \Rightarrow \angle (AM, KL) = \angle (AP, KM)$ .

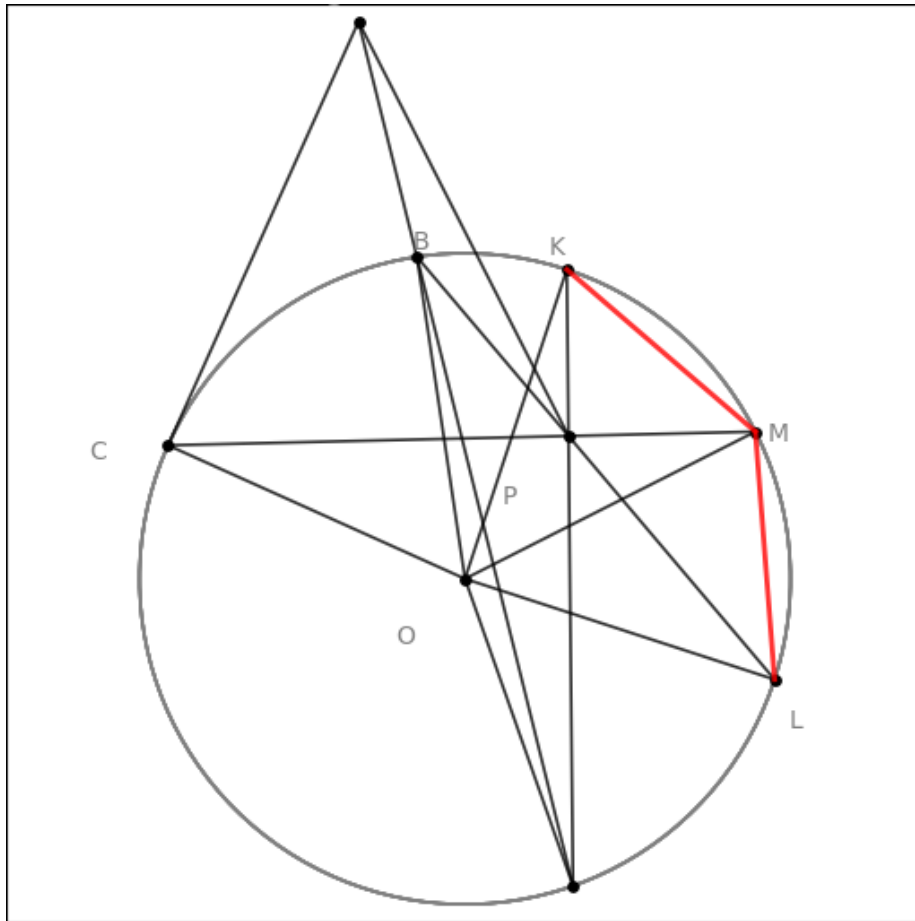

Figure 15: imo 2010 p4

Step 20.  $AO = CO$ ,  $BO = CO$ ,  $CO = LO$ ,  $CO = MO$  and  $C, K, L, M$  are cyclic  $\Rightarrow A, B, K, M$  are cyclic.

Step 21.  $A, B, K, M$  are cyclic  $\Rightarrow \angle KAM = \angle KBM$ .

Step 22.  $A, K, P$  are collinear,  $\angle KAM = \angle KBM$  and  $\angle (AM, KL) = \angle (AP, KM) \Rightarrow \angle KBM = \angle MKL$ .

Step 23.  $BO = CO$ ,  $CO = LO$ ,  $CO = MO$  and  $C, K, L, M$  are cyclic  $\Rightarrow B, K, L, M$  are cyclic.

Step 24.  $B, K, L, M$  are cyclic and  $\angle KBM = \angle MKL \Rightarrow KM = LM$

■

## 2.16 IMO 2011 P6

Original:

Let  $ABC$  be a triangle with circumcircle  $\Gamma$ . Let  $l$  be a tangent line to  $\Gamma$ , and let  $l_a, l_b, l_c$  be the lines obtained by reflecting  $l$  in the lines  $BC, CA,$  and  $AB,$  respectively. Show that the circumcircle of the triangle determined by the lines  $l_a, l_b,$  and  $l_c$  is tangent to the circle  $\Gamma$ .

**Translated:**

Let  $ABC$  be a triangle. Define point  $O$  as the circumcenter of triangle  $CBA$ . Let  $P$  be any point on circle  $(O, A)$ . Define point  $Q$  such that  $OP$  is perpendicular to  $PQ$ . Define point  $P_A$  as the intersection of circles  $(B, P)$  and  $(C, P)$ . Define point  $P_B$  as the intersection of circles  $(A, P)$  and  $(C, P)$ . Define point  $P_C$  as the intersection of circles  $(A, P)$  and  $(B, P)$ . Define point  $Q_A$  as the intersection of circles  $(B, Q)$  and  $(C, Q)$ . Define point  $Q_B$  as the intersection of circles  $(A, Q)$  and  $(C, Q)$ . Define point  $Q_C$  as the intersection of circles  $(A, Q)$  and  $(B, Q)$ . Define point  $A_1$  as the intersection of lines  $P_BQ_B$  and  $P_CQ_C$ . Define point  $B_1$  as the intersection of lines  $P_AQ_A$  and  $P_CQ_C$ . Define point  $C_1$  as the intersection of lines  $P_AQ_A$  and  $P_BQ_B$ . Define point  $O_1$  as the circumcenter of triangle  $B_1A_1C_1$ . Define point  $X$  as the intersection of circles  $(O, A)$  and  $(O_1, A_1)$ . Prove that  $X, O, O_1$  are collinear

**Proof:**

Not solved.

## 2.17 IMO 2012 P1

**Original:**

Given triangle  $ABC$  the point  $J$  is the centre of the excircle opposite the vertex  $A$ . This excircle is tangent to the side  $BC$  at  $M$ , and to the lines  $AB$  and  $AC$  at  $K$  and  $L$ , respectively. The lines  $LM$  and  $BJ$  meet at  $F$ , and the lines  $KM$  and  $CJ$  meet at  $G$ . Let  $S$  be the point of intersection of the lines  $AF$  and  $BC$ , and let  $T$  be the point of intersection of the lines  $AG$  and  $BC$ . Prove that  $M$  is the midpoint of  $ST$ .

**Translated:**

Let  $ABC$  be a triangle. Define point  $J$  such that  $AJ$  is the bisector of  $\angle BAC$  and  $CJ$  is the bisector of  $\angle ACB$ . Define point  $M$  as the foot of  $J$  on line  $BC$ . Define point  $L$  as the foot of  $J$  on line  $AC$ . Define point  $K$  as the foot of  $J$  on line  $AB$ . Define point  $F$  as the intersection of lines  $BJ$  and  $LM$ . Define point  $G$  as the intersection of lines  $CJ$  and  $KM$ . Define point  $S$  as the intersection of lines  $AF$  and  $BC$ . Define point  $T$  as the intersection of lines  $AG$  and  $BC$ . Prove that  $MS = MT$

**Proof:**

Step 1.  $A, C, L$  are collinear,  $B, C, M$  are collinear and  $CJ$  is the bisector of  $\angle ACB \Rightarrow CJ$  is the bisector of  $\angle MCL$ .

Step 2.  $A, C, L$  are collinear,  $B, C, M$  are collinear,  $AC$  is perpendicular to  $JL$  and  $BC$  is perpendicular to  $JM \Rightarrow \angle CMJ = \angle JLC$ .

Step 3.  $CJ$  is the bisector of  $\angle MCL$  and  $\angle CMJ = \angle JLC \Rightarrow JL = JM, CL = CM$  and  $JC$  is the bisector of  $\angle MJL$ .

Step 4.  $A, B, K$  are collinear,  $A, C, L$  are collinear,  $AB$  is perpendicular to  $JK$  and  $AC$  is perpendicular to  $JL \Rightarrow \angle AKJ = \angle JLA$ .

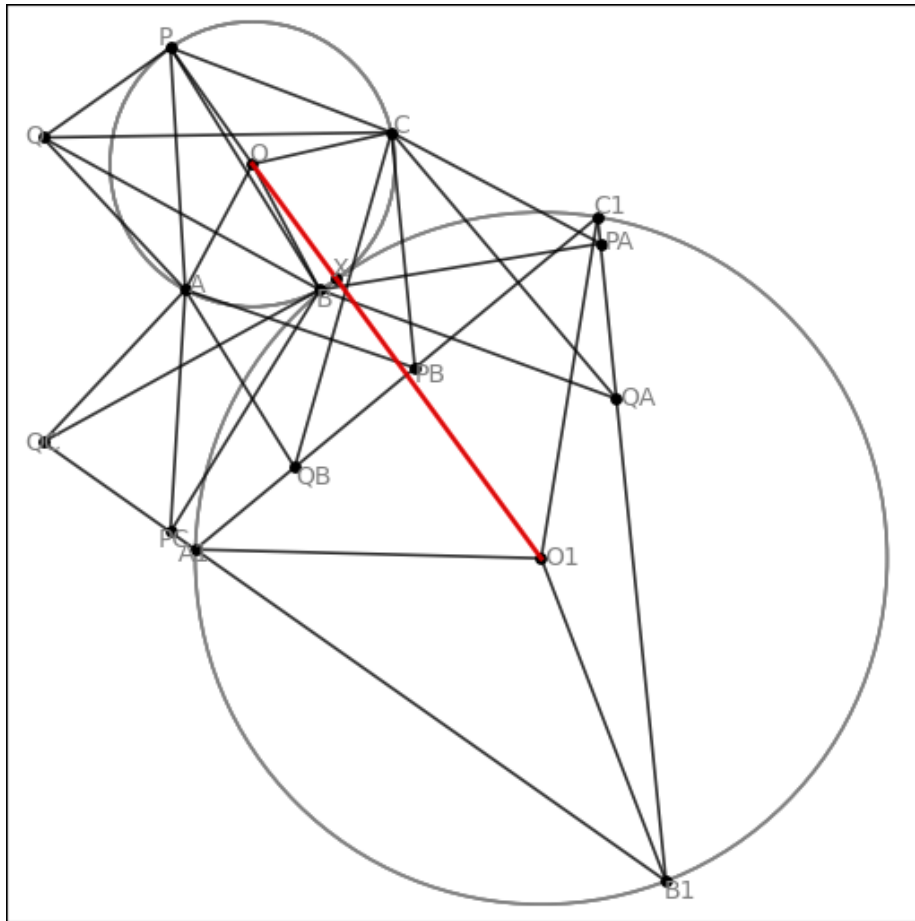

Figure 16: imo 2011 p6

Step 5.  $A, B, K$  are collinear,  $A, C, L$  are collinear and  $AJ$  is the bisector of  $\angle BAC \Rightarrow AJ$  is the bisector of  $\angle LAK$ .

Step 6.  $AJ$  is the bisector of  $\angle LAK$  and  $\angle AKJ = \angle JLA \Rightarrow JK = JL$ .

Step 7.  $JK = JL$  and  $JL = JM \Rightarrow J$  is the circumcenter of  $KLM$ .

Step 8.  $B, C, M$  are collinear,  $B, C, S$  are collinear and  $BC$  is perpendicular to  $JM \Rightarrow JM$  is perpendicular to  $MS$ .

Step 9.  $J$  is the circumcenter of  $KLM$  and  $JM$  is perpendicular to  $MS \Rightarrow \angle LKM = \angle LMS$ .

Step 10.  $A, B, K$  are collinear and  $AB$  is perpendicular to  $JK \Rightarrow AK$  is perpendicular to  $JK$ .

Step 11.  $J$  is the circumcenter of  $KLM$  and  $AK$  is perpendicular to  $JK \Rightarrow \angle AKL = \angle KML$ .

Step 12.  $A, B, K$  are collinear,  $B, C, M$  are collinear,  $AB$  is perpendicular

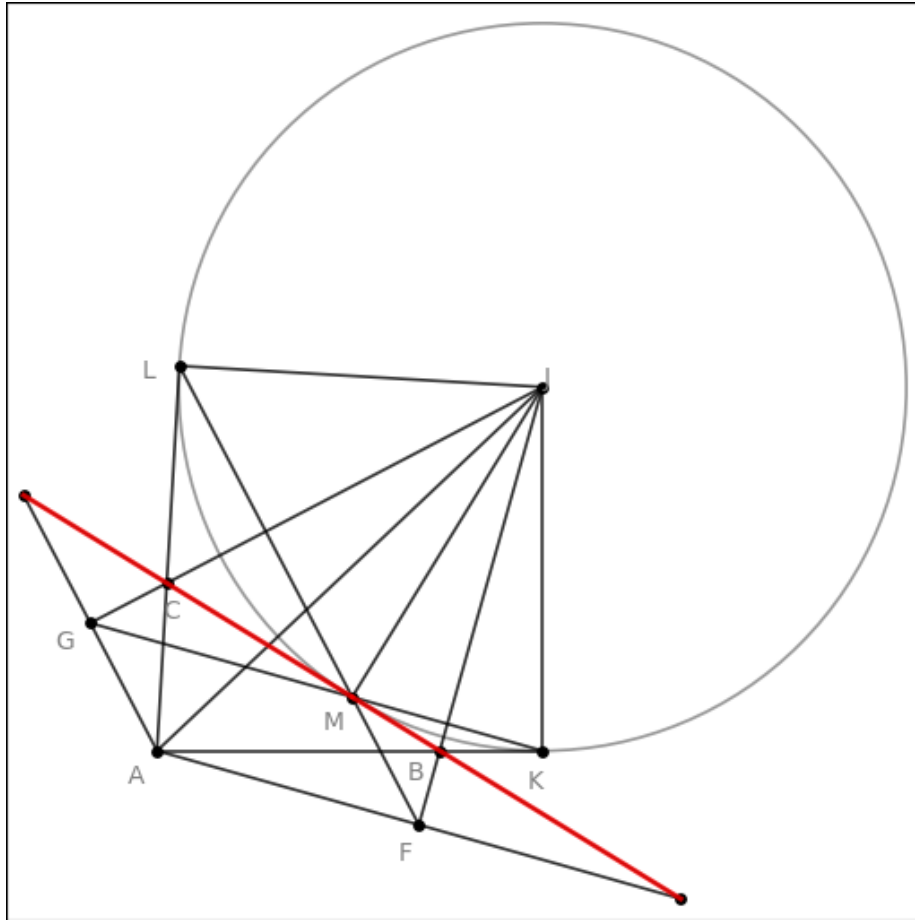

Figure 17: imo 2012 p1

to  $JK$  and  $BC$  is perpendicular to  $JM \Rightarrow \angle BKJ = \angle BMJ$ .

Step 13.  $\angle BKJ = \angle BMJ \Rightarrow B, J, K, M$  are cyclic.

Step 14.  $B, J, K, M$  are cyclic  $\Rightarrow \angle JBM = \angle JKM$  and  $\angle JBK = \angle JMK$ .

Step 15.  $JK = JL$  and  $JL = JM \Rightarrow JK = JM$ .

Step 16.  $A, B, K$  are collinear,  $B, C, M$  are collinear,  $B, C, S$  are collinear,  $B, F, J$  are collinear,  $\angle JBK = \angle JMK$ ,  $\angle JBM = \angle JKM$ ,  $\angle AKL = \angle KML$  and  $\angle LKM = \angle LMS \Rightarrow JF$  is the bisector of  $\angle MJK$ .

Step 17.  $JK = JM$  and  $JF$  is the bisector of  $\angle MJK \Rightarrow \angle FKJ = \angle JMF$ .

Step 18.  $CL = CM$  and  $JL = JM \Rightarrow CJ$  is perpendicular to  $LM$ .

Step 19.  $F, L, M$  are collinear and  $CJ$  is perpendicular to  $LM \Rightarrow CJ$  is perpendicular to  $FM$ .

Step 20.  $AK$  is perpendicular to  $JK$  and  $CJ$  is perpendicular to  $FM \Rightarrow \angle(AK, CJ) = \angle(JK, FM)$ .



Step 21.  $\angle(AK, CJ) = \angle(JK, FM)$  and  $\angle FKJ = \angle JMF \Rightarrow \angle(AK, CJ) = \angle(FK, JM)$ .

Step 22.  $B, C, S$  are collinear,  $F, L, M$  are collinear,  $BC$  is perpendicular to  $JM$  and  $CJ$  is perpendicular to  $LM \Rightarrow \angle(BS, JM) = \angle(FM, CJ)$ .

Step 23.  $\angle(AK, CJ) = \angle(FK, JM)$  and  $\angle(BS, JM) = \angle(FM, CJ) \Rightarrow \angle(AK, FM) = \angle(FK, BS)$ .

Step 24.  $A, C, L$  are collinear,  $B, C, M$  are collinear,  $AC$  is perpendicular to  $JL$  and  $BC$  is perpendicular to  $JM \Rightarrow \angle CLJ = \angle CMJ$ .

Step 25.  $\angle CLJ = \angle CMJ \Rightarrow C, J, L, M$  are cyclic.

Step 26.  $C, J, L, M$  are cyclic  $\Rightarrow \angle JCM = \angle JLM$ .

Step 27.  $B, C, M$  are collinear,  $B, C, S$  are collinear,  $C, G, J$  are collinear,  $G, K, M$  are collinear,  $\angle JCM = \angle JLM$  and  $\angle LKM = \angle LMS \Rightarrow \angle GJL = \angle GKL$ .

Step 28.  $\angle GJL = \angle GKL \Rightarrow G, J, K, L$  are cyclic.

Step 29.  $A, B, K$  are collinear,  $A, C, L$  are collinear,  $AB$  is perpendicular to  $JK$  and  $AC$  is perpendicular to  $JL \Rightarrow \angle AKJ = \angle ALJ$ .

Step 30.  $\angle AKJ = \angle ALJ \Rightarrow A, J, K, L$  are cyclic.

Step 31.  $A, J, K, L$  are cyclic and  $G, J, K, L$  are cyclic  $\Rightarrow A, G, J, K$  are cyclic.

Step 32.  $A, G, J, K$  are cyclic  $\Rightarrow \angle AGJ = \angle AKJ$ .

Step 33.  $B, C, M$  are collinear,  $B, C, S$  are collinear,  $B, F, J$  are collinear,  $F, L, M$  are collinear,  $\angle JBM = \angle JKM$  and  $\angle LKM = \angle LMS \Rightarrow \angle FJK = \angle FLK$ .

Step 34.  $\angle FJK = \angle FLK \Rightarrow F, J, K, L$  are cyclic.

Step 35.  $A, J, K, L$  are cyclic and  $F, J, K, L$  are cyclic  $\Rightarrow A, F, J, K$  are cyclic.

Step 36.  $A, F, J, K$  are cyclic and  $F, J, K, L$  are cyclic  $\Rightarrow A, F, J, L$  are cyclic.

Step 37.  $A, F, J, L$  are cyclic  $\Rightarrow \angle AFJ = \angle ALJ$ .

Step 38.  $A, F, J, K$  are cyclic  $\Rightarrow \angle AFJ = \angle AKJ$ .

Step 39.  $A, B, K$  are collinear,  $B, C, M$  are collinear,  $B, C, S$  are collinear,  $\angle JBK = \angle JMK$ ,  $\angle JBM = \angle JKM$ ,  $\angle AKL = \angle KML$  and  $\angle LKM = \angle LMS \Rightarrow JB$  is the bisector of  $\angle MJK$ .

Step 40.  $B, J, K, M$  are cyclic and  $JB$  is the bisector of  $\angle MJK \Rightarrow BK = BM$ .

Step 41.  $BK = BM$  and  $JK = JM \Rightarrow BJ$  is perpendicular to  $KM$ .

Step 42.  $BK = BM \Rightarrow \angle BKM = \angle KMB$ .

Step 43.  $A, B, K$  are collinear,  $A, G, T$  are collinear,  $B, C, M$  are collinear,  $B, C, S$  are collinear,  $B, C, T$  are collinear,  $C, G, J$  are collinear,  $F, L, M$  are collinear,  $\angle(AK, FM) = \angle(FK, BS)$ ,  $\angle AGJ = \angle AKJ$ ,  $AB$  is perpendicular to  $JK$  and  $CJ$  is perpendicular to  $LM \Rightarrow \angle AKF = \angle GTM$ .

Step 44.  $A, B, K$  are collinear,  $B, C, M$  are collinear,  $B, C, T$  are collinear,  $B, F, J$  are collinear,  $G, K, M$  are collinear,  $\angle AFJ = \angle AKJ$ ,  $\angle BKM = \angle KMB$ ,  $AB$  is perpendicular to  $JK$  and  $BJ$  is perpendicular to  $KM \Rightarrow \angle FAK = \angle TMG$ .

Step 45.  $\angle FAK = \angle TMG$  and  $\angle AKF = \angle GTM \Rightarrow \frac{AF}{GM} = \frac{AK}{MT}$ .

Step 46.  $JK = JM \Rightarrow \angle JKM = \angle KMJ$ .

Step 47.  $A, J, K, L$  are cyclic  $\Rightarrow \angle JAL = \angle JKL$ .

Step 48.  $A, B, K$  are collinear,  $B, F, J$  are collinear,  $\angle JBK = \angle JMK$  and  $\angle JKM = \angle K MJ \Rightarrow \angle (AK, FJ) = \angle JKM$ .

Step 49.  $A, B, K$  are collinear,  $A, C, L$  are collinear,  $AJ$  is the bisector of  $\angle BAC$  and  $\angle JAL = \angle JKL \Rightarrow \angle KAJ = \angle JKL$ .

Step 50.  $\angle KAJ = \angle JKL$  and  $\angle (AK, FJ) = \angle JKM \Rightarrow \angle AJF = \angle LKM$ .

Step 51.  $B, C, M$  are collinear,  $B, C, S$  are collinear,  $C, G, J$  are collinear,  $\angle JCM = \angle JLM$ ,  $\angle AJF = \angle LKM$  and  $\angle LKM = \angle LMS \Rightarrow \angle AJF = \angle LJG$ .

Step 52.  $A, F, J, K$  are cyclic,  $A, G, J, K$  are cyclic and  $G, J, K, L$  are cyclic  $\Rightarrow A, F, G, J, L$  are cyclic.

Step 53.  $A, F, G, J, L$  are cyclic and  $\angle AJF = \angle LJG \Rightarrow AF = GL$ .

Step 54.  $C, G, J$  are collinear and  $JC$  is the bisector of  $\angle MJL \Rightarrow JG$  is the bisector of  $\angle MJL$ .

Step 55.  $JL = JM$  and  $JG$  is the bisector of  $\angle MJL \Rightarrow GL = GM$ .

Step 56.  $B, C, M$  are collinear and  $B, C, S$  are collinear  $\Rightarrow B, M, S$  are collinear.

Step 57.  $A, C, L$  are collinear,  $A, F, S$  are collinear,  $B, F, J$  are collinear,  $\angle AFJ = \angle ALJ$ ,  $AC$  is perpendicular to  $JL$  and  $BJ$  is perpendicular to  $KM \Rightarrow AS$  is parallel to  $KM$ .

Step 58.  $A, B, K$  are collinear,  $B, M, S$  are collinear and  $AS$  is parallel to  $KM \Rightarrow \frac{AK}{MS} = \frac{BK}{BM}$ .

Step 59.  $AF = GL$ ,  $BK = BM$ ,  $GL = GM$ ,  $\frac{AF}{GM} = \frac{AK}{MT}$  and  $\frac{AK}{MS} = \frac{BK}{BM} \Rightarrow MS = MT$

■

## 2.18 IMO 2012 P5

### Original:

Let  $ABC$  be a triangle with  $\angle BCA = 90^\circ$ , and let  $D$  be the foot of the altitude from  $C$ . Let  $X$  be a point in the interior of the segment  $CD$ . Let  $K$  be the point on the segment  $AX$  such that  $BK = BC$ . Similarly, let  $L$  be the point on the segment  $BX$  such that  $AL = AC$ . Let  $M = AL \cap BK$ . Prove that  $MK = ML$ .

### Translated:

Let  $C$  and  $A$  be any two distinct points. Define point  $B$  such that  $CA$  is perpendicular to  $CB$ . Define point  $D$  as the foot of  $C$  on line  $AB$ . Let  $X$  be any point on line  $CD$ . Define point  $K$  as the intersection of circle  $(B, C)$  and line  $AX$ . Define point  $L$  as the intersection of circle  $(A, C)$  and line  $BX$ . Define point  $M$  as the intersection of lines  $AL$  and  $BK$ . Prove that  $KM = LM$ .

### Proof:

Construct point  $J$  such that  $AJ = BJ$  and  $\angle CAJ = \angle JCA$ .

Construct point  $E$  such that  $AJ$  is perpendicular to  $DE$  and  $AE$  is perpendicular to  $BX$ .

Step 1.  $\angle CAJ = \angle JCA \Rightarrow CJ = AJ$ .

Step 2.  $CJ = AJ$  and  $AJ = BJ \Rightarrow CJ = BJ$ .

Step 3.  $CJ = BJ \Rightarrow \angle CBJ = \angle JCB$ .

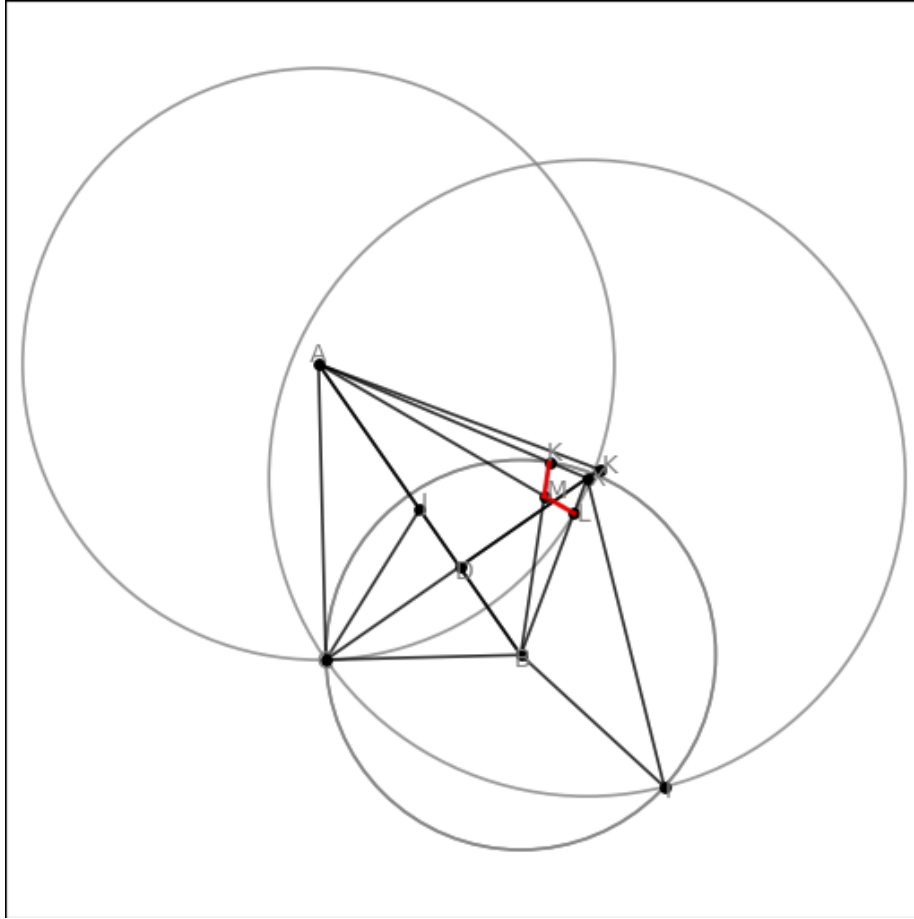

Figure 18: imo 2012 p5

Step 4.  $CA$  is perpendicular to  $CB$  and  $AJ$  is perpendicular to  $DE \Rightarrow \angle ACB = \angle(AJ, DE)$ .

Step 5.  $\angle ACB = \angle(AJ, DE)$  and  $\angle CAJ = \angle JCA \Rightarrow \angle(CA, DE) = \angle JCB$ .

Step 6.  $\angle(CA, DE) = \angle JCB$  and  $\angle CBJ = \angle JCB \Rightarrow \angle(CA, DE) = \angle CBJ$ .

Step 7.  $\angle(CA, DE) = \angle CBJ$  and  $CA$  is perpendicular to  $CB \Rightarrow BJ$  is perpendicular to  $DE$ .

Step 8.  $C, D, X$  are collinear,  $A, B, D$  are collinear and  $CD$  is perpendicular to  $AB \Rightarrow AD$  is perpendicular to  $DX$ .

Step 9.  $AD$  is perpendicular to  $DX$  and  $AJ$  is perpendicular to  $DE \Rightarrow \angle ADE = \angle(DX, AJ)$  and  $\angle DAJ = \angle XDE$ .

Step 10.  $B, X, L$  are collinear and  $AE$  is perpendicular to  $BX \Rightarrow AE$  is

perpendicular to  $XL$ .

Step 11.  $AD$  is perpendicular to  $DX$  and  $AE$  is perpendicular to  $XL \Rightarrow \angle DAE = \angle DXL$  and  $\angle(AD, XL) = \angle(DX, AE)$ .

Step 12.  $A, B, D$  are collinear,  $\angle ADE = \angle(DX, AJ)$ ,  $AJ$  is perpendicular to  $DE$  and  $BJ$  is perpendicular to  $DE \Rightarrow \angle ADE = \angle XDB$ .

Step 13.  $B, X, L$  are collinear and  $\angle DAE = \angle DXL \Rightarrow \angle EAD = \angle BXD$ .

Step 14.  $\angle EAD = \angle BXD$  and  $\angle ADE = \angle XDB \Rightarrow \frac{DA}{DX} = \frac{DE}{DB}$ .

Step 15.  $A, B, D$  are collinear,  $\angle ADE = \angle(DX, AJ)$ ,  $AJ$  is perpendicular to  $DE$  and  $BJ$  is perpendicular to  $DE \Rightarrow \angle ADX = \angle EDB$ .

Step 16.  $\angle ADX = \angle EDB$  and  $\frac{DA}{DX} = \frac{DE}{DB} \Rightarrow \angle XAD = \angle BED$  and  $\angle AXD = \angle EBD$ .

Step 17.  $A, B, D$  are collinear,  $\angle DAJ = \angle XDE$ ,  $AJ$  is perpendicular to  $DE$  and  $BJ$  is perpendicular to  $DE \Rightarrow \angle ADX = \angle ADE$ .

Step 18.  $\angle ADX = \angle ADE \Rightarrow DX$  is parallel to  $DE$ .

Step 19.  $DX$  is parallel to  $DE \Rightarrow D, X, E$  are collinear.

Step 20.  $A, B, D$  are collinear,  $CA$  is perpendicular to  $CB$  and  $CD$  is perpendicular to  $AB \Rightarrow \angle BCA = \angle CDB$ .

Step 21.  $A, B, D$  are collinear  $\Rightarrow \angle CBA = \angle CBD$ .

Step 22.  $\angle BCA = \angle CDB$  and  $\angle CBA = \angle CBD \Rightarrow \frac{BC}{BD} = \frac{BA}{BC}$ .

Step 23.  $A, B, D$  are collinear  $\Rightarrow \angle ABK = \angle DBK$ .

Step 24.  $CB = BK$  and  $\frac{BC}{BD} = \frac{BA}{BC} \Rightarrow \frac{BA}{BK} = \frac{BK}{BD}$ .

Step 25.  $\angle ABK = \angle DBK$  and  $\frac{BA}{BK} = \frac{BK}{BD} \Rightarrow \angle BAK = \angle DKB$ .

Step 26.  $A, B, D$  are collinear,  $A, X, K$  are collinear,  $\angle BAK = \angle DKB$  and  $\angle XAD = \angle BED \Rightarrow \angle BKD = \angle BED$ .

Step 27.  $\angle BKD = \angle BED \Rightarrow B, D, K, E$  are cyclic.

Step 28.  $B, D, K, E$  are cyclic  $\Rightarrow \angle DBE = \angle DKE$  and  $\angle DBK = \angle DEK$ .

Step 29.  $A, X, K$  are collinear,  $D, X, E$  are collinear,  $\angle DBE = \angle DKE$  and  $\angle AXD = \angle EBD \Rightarrow \angle DKE = \angle EXK$ .

Step 30.  $D, X, E$  are collinear  $\Rightarrow \angle DEK = \angle XEK$ .

Step 31.  $\angle DKE = \angle EXK$  and  $\angle DEK = \angle XEK \Rightarrow \frac{DK}{DE} = \frac{KX}{KE}$  and  $\frac{KD}{KE} = \frac{XK}{XE}$ .

Step 32.  $CA$  is perpendicular to  $CB$  and  $AD$  is perpendicular to  $DX \Rightarrow \angle(CA, DX) = \angle(CB, AD)$ .

Step 33.  $C, D, X$  are collinear,  $A, B, D$  are collinear and  $\angle(CA, DX) = \angle(CB, AD) \Rightarrow \angle ACD = \angle CBA$ .

Step 34.  $A, B, D$  are collinear,  $CA$  is perpendicular to  $CB$  and  $CD$  is perpendicular to  $AB \Rightarrow \angle ACB = \angle CDA$ .

Step 35.  $\angle ACD = \angle CBA$  and  $\angle ACB = \angle CDA \Rightarrow \frac{AC}{AD} = \frac{AB}{AC}$ .

Step 36.  $CA = AL$  and  $\frac{AC}{AD} = \frac{AB}{AC} \Rightarrow \frac{AB}{AL} = \frac{AL}{AD}$ .

Step 37.  $A, B, D$  are collinear  $\Rightarrow \angle BAL = \angle DAL$ .

Step 38.  $\angle BAL = \angle DAL$  and  $\frac{AB}{AL} = \frac{AL}{AD} \Rightarrow \angle ADL = \angle BLA$ .

Step 39.  $B, X, L$  are collinear and  $\angle ADL = \angle BLA \Rightarrow \angle ADL = \angle XLA$ .

Step 40.  $\angle(AD, XL) = \angle(DX, AE) \Rightarrow \angle ADX = \angle(XL, AE)$ .

Step 41.  $\angle ADX = \angle(XL, AE)$  and  $\angle ADL = \angle XLA \Rightarrow \angle EAL = \angle XDL$ .

Step 42.  $\angle EAL = \angle XDL$  and  $DX$  is parallel to  $DE \Rightarrow \angle ALD = \angle AED$ .

- Step 43.  $\angle ALD = \angle AED \Rightarrow A, D, L, E$  are cyclic.
- Step 44.  $A, D, L, E$  are cyclic  $\Rightarrow \angle ADL = \angle AEL$  and  $\angle ADE = \angle ALE$ .
- Step 45.  $D, X, E$  are collinear,  $\angle DAE = \angle DXL$  and  $\angle ADL = \angle AEL \Rightarrow \angle DLE = \angle EXL$ .
- Step 46.  $D, X, E$  are collinear  $\Rightarrow \angle DEL = \angle XEL$ .
- Step 47.  $\angle DLE = \angle EXL$  and  $\angle DEL = \angle XEL \Rightarrow \frac{DL}{DE} = \frac{LX}{LE}$  and  $\frac{LD}{LE} = \frac{XL}{XE}$ .
- Step 48.  $\frac{DK}{DE} = \frac{KX}{KE}$ ,  $\frac{DL}{DE} = \frac{LX}{LE}$ ,  $\frac{KD}{KE} = \frac{XK}{XE}$  and  $\frac{LD}{LE} = \frac{XL}{XE} \Rightarrow$  by ratio chasing:  $KE = LE$ .
- Step 49.  $KE = LE \Rightarrow \angle KLE = \angle EKL$ .
- Step 50.  $A, B, D$  are collinear,  $A, L, M$  are collinear,  $B, K, M$  are collinear,  $\angle DBK = \angle DEK$  and  $\angle ADE = \angle ALE \Rightarrow \angle MKE = \angle MLE$ .
- Step 51.  $\angle MKE = \angle MLE \Rightarrow K, L, M, E$  are cyclic.
- Step 52.  $K, L, M, E$  are cyclic  $\Rightarrow \angle LKM = \angle LEM$  and  $\angle KLM = \angle KEM$ .
- Step 53.  $C, D, X$  are collinear,  $A, B, D$  are collinear,  $B, K, M$  are collinear,  $D, X, E$  are collinear,  $\angle DBK = \angle DEK$  and  $CD$  is perpendicular to  $AB \Rightarrow KM$  is perpendicular to  $KE$ .
- Step 54.  $C, D, X$  are collinear,  $A, B, D$  are collinear,  $D, X, E$  are collinear,  $\angle ADE = \angle ALE$  and  $CD$  is perpendicular to  $AB \Rightarrow AL$  is perpendicular to  $LE$ .
- Step 55.  $AL$  is perpendicular to  $LE$  and  $KM$  is perpendicular to  $KE \Rightarrow \angle (AL, KE) = \angle (LE, KM)$ .
- Step 56.  $\angle LKM = \angle LEM$ ,  $\angle KLM = \angle KEM$  and  $\angle KLE = \angle EKL \Rightarrow ME$  is the bisector of  $\angle KML$ .
- Step 57.  $A, L, M$  are collinear and  $\angle (AL, KE) = \angle (LE, KM) \Rightarrow \angle EKM = \angle MLE$ .
- Step 58.  $\angle EKM = \angle MLE$  and  $ME$  is the bisector of  $\angle KML \Rightarrow \frac{MK}{ML} = \frac{EK}{EL}$ .
- Step 59.  $KE = LE$  and  $\frac{MK}{ML} = \frac{EK}{EL} \Rightarrow KM = LM$
- 

## 2.19 IMO 2013 P4

### Original:

Let  $ABC$  be a triangle with orthocenter  $H$ , and let  $W$  be a point on the side  $BC$ , between  $B$  and  $C$ . The points  $M$  and  $N$  are the feet of the altitudes drawn from  $B$  and  $C$ , respectively. Suppose  $W_1$  is the circumcircle of triangle  $BWN$  and  $X$  is a point such that  $WX$  is a diameter of  $W_1$ . Similarly,  $W_2$  is the circumcircle of triangle  $CWM$  and  $Y$  is a point such that  $WY$  is a diameter of  $W_2$ . Show that the points  $X$ ,  $Y$ , and  $H$  are collinear.

### Translated:

Let  $ABC$  be a triangle. Define point  $H$  as the orthocenter of triangle  $CBA$ . Define point  $M$  as the intersection of lines  $AC$  and  $BH$ . Define point  $N$  as the intersection of lines  $AB$  and  $CH$ . Define point  $W$  on line  $BC$  such that  $BC$  is parallel to  $BW$ . Define point  $O_1$  as the circumcenter of triangle  $WBN$ . Define

point  $O_2$  as the circumcenter of triangle  $WCM$ . Define point  $X$  as the mirror of  $W$  through  $O_1$ . Define point  $Y$  as the mirror of  $W$  through  $O_2$ . Prove that  $H, X, Y$  are collinear

**Proof:**

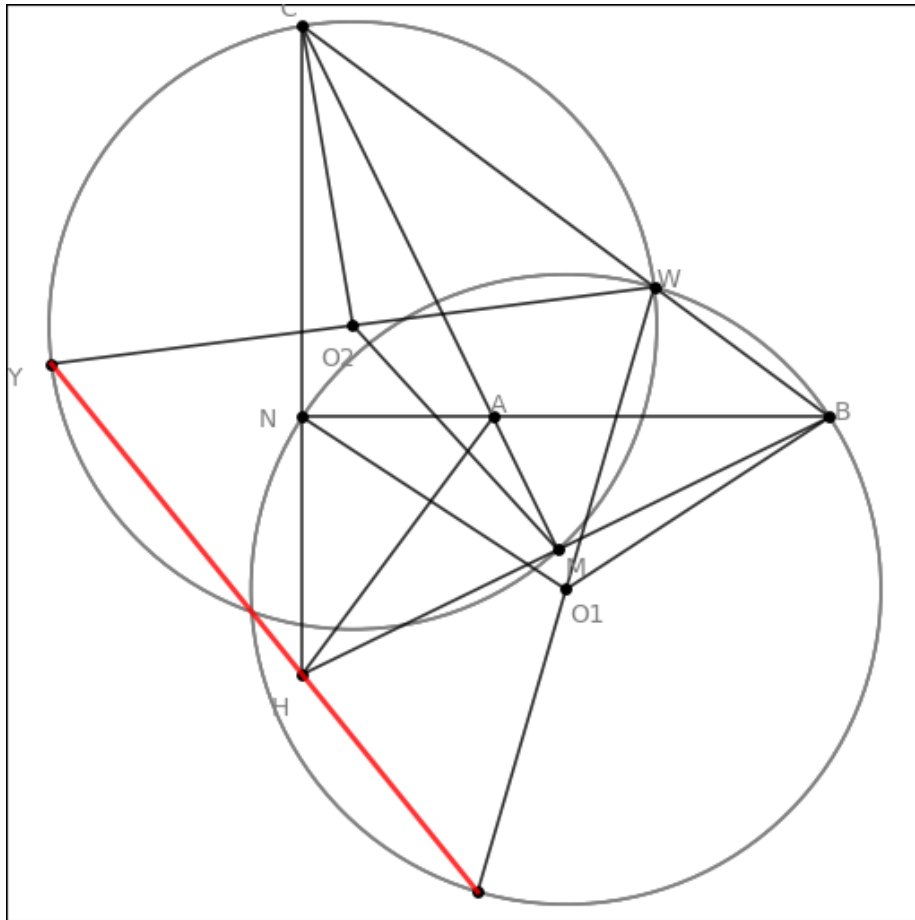

Figure 19: imo 2013 p4

Step 1.  $B, C, W$  are collinear and  $AH$  is perpendicular to  $BC \Rightarrow AH$  is perpendicular to  $CW$ .

Step 2.  $AC$  is perpendicular to  $BH$  and  $AH$  is perpendicular to  $CW \Rightarrow \angle CAH = \angle (BH, CW)$ .

Step 3.  $A, C, M$  are collinear,  $B, C, W$  are collinear,  $B, H, M$  are collinear and  $\angle CAH = \angle (BH, CW) \Rightarrow \angle HAM = \angle CBM$ .

Step 4.  $A, C, M$  are collinear,  $B, H, M$  are collinear and  $AC$  is perpendicular to  $BH \Rightarrow \angle AMH = \angle BMC$ .

Step 5.  $\angle HAM = \angle CBM$  and  $\angle AMH = \angle BMC \Rightarrow \frac{MA}{MB} = \frac{MH}{MC}$ .

Step 6.  $A, C, M$  are collinear,  $B, H, M$  are collinear and  $AC$  is perpendicular to  $BH \Rightarrow \angle AMB = \angle HMC$ .

Step 7.  $\angle AMB = \angle HMC$  and  $\frac{MA}{MB} = \frac{MH}{MC} \Rightarrow \angle ABM = \angle HCM$  and  $\angle BAM = \angle CHM$ .

Step 8.  $NO_1 = O_1W$  and  $O_1W = O_1X \Rightarrow O_1$  is the circumcenter of  $NWX$ .

Step 9.  $O_1$  is the circumcenter of  $NWX$  and  $O_1, W, X$  are collinear  $\Rightarrow NW$  is perpendicular to  $NX$ .

Step 10.  $AC$  is perpendicular to  $BH$  and  $NW$  is perpendicular to  $NX \Rightarrow \angle(AC, BH) = \angle XNW$ .

Step 11.  $BO_1 = NO_1$ ,  $NO_1 = O_1W$  and  $O_1W = O_1X \Rightarrow O_1$  is the circumcenter of  $BWX$ .

Step 12.  $O_1$  is the circumcenter of  $BWX$  and  $O_1, W, X$  are collinear  $\Rightarrow BW$  is perpendicular to  $BX$ .

Step 13.  $BO_1 = NO_1$ ,  $NO_1 = O_1W$  and  $O_1W = O_1X \Rightarrow B, N, W, X$  are cyclic.

Step 14.  $B, N, W, X$  are cyclic  $\Rightarrow \angle BNW = \angle BXW$ .

Step 15.  $A, B, N$  are collinear,  $A, C, M$  are collinear,  $B, H, M$  are collinear,  $C, H, N$  are collinear,  $\angle(AC, BH) = \angle XNW$  and  $\angle ABM = \angle HCM \Rightarrow \angle ANH = \angle WNX$ .

Step 16.  $A, B, N$  are collinear,  $\angle BNW = \angle BXW$ ,  $BC$  is parallel to  $BW$ ,  $AH$  is perpendicular to  $BC$  and  $BW$  is perpendicular to  $BX \Rightarrow \angle HAN = \angle XWN$ .

Step 17.  $\angle HAN = \angle XWN$  and  $\angle ANH = \angle WNX \Rightarrow \frac{NA}{NW} = \frac{NH}{NX}$ .

Step 18.  $A, B, N$  are collinear,  $A, C, M$  are collinear,  $B, H, M$  are collinear,  $\angle BAM = \angle CHM$  and  $\angle ABM = \angle HCM \Rightarrow AN$  is perpendicular to  $CH$ .

Step 19.  $AN$  is perpendicular to  $CH$  and  $NW$  is perpendicular to  $NX \Rightarrow \angle ANW = \angle(CH, NX)$ .

Step 20.  $C, H, N$  are collinear and  $\angle ANW = \angle(CH, NX) \Rightarrow \angle ANW = \angle HNX$ .

Step 21.  $\angle ANW = \angle HNX$  and  $\frac{NA}{NW} = \frac{NH}{NX} \Rightarrow \angle(AW, HX) = \angle WNX$ .

Step 22.  $CO_2 = MO_2$ ,  $MO_2 = O_2W$  and  $O_2W = O_2Y \Rightarrow O_2$  is the circumcenter of  $CWY$ .

Step 23.  $O_2$  is the circumcenter of  $CWY$  and  $O_2, W, Y$  are collinear  $\Rightarrow CW$  is perpendicular to  $CY$ .

Step 24.  $CO_2 = MO_2$ ,  $MO_2 = O_2W$  and  $O_2W = O_2Y \Rightarrow C, M, W, Y$  are cyclic.

Step 25.  $C, M, W, Y$  are cyclic  $\Rightarrow \angle CMW = \angle CYW$ .

Step 26.  $MO_2 = O_2W$  and  $O_2W = O_2Y \Rightarrow O_2$  is the circumcenter of  $MWY$ .

Step 27.  $O_2$  is the circumcenter of  $MWY$  and  $O_2, W, Y$  are collinear  $\Rightarrow MW$  is perpendicular to  $MY$ .

Step 28.  $AC$  is perpendicular to  $BH$  and  $MW$  is perpendicular to  $MY \Rightarrow \angle(AC, MW) = \angle(BH, MY)$  and  $\angle(AC, BH) = \angle YMW$ .

Step 29.  $A, C, M$  are collinear,  $B, C, W$  are collinear,  $\angle CMW = \angle CYW$ ,  $AH$  is perpendicular to  $BC$  and  $CW$  is perpendicular to  $CY \Rightarrow \angle HAM = \angle YWM$ .

- Step 30.  $A, C, M$  are collinear,  $B, H, M$  are collinear,  $AC$  is perpendicular to  $BH$  and  $MW$  is perpendicular to  $MY \Rightarrow \angle AMH = \angle WMY$ .
- Step 31.  $\angle HAM = \angle YWM$  and  $\angle AMH = \angle WMY \Rightarrow \frac{MA}{MW} = \frac{MH}{MY}$ .
- Step 32.  $A, C, M$  are collinear,  $B, H, M$  are collinear and  $\angle(AC, MW) = \angle(BH, MY) \Rightarrow \angle AMW = \angle HMY$ .
- Step 33.  $\angle AMW = \angle HMY$  and  $\frac{MA}{MW} = \frac{MH}{MY} \Rightarrow \angle MAW = \angle MHY$  and  $\angle(AW, HY) = \angle WMY$ .
- Step 34.  $A, C, M$  are collinear,  $B, H, M$  are collinear,  $\angle(AC, BH) = \angle YMW$ ,  $\angle MAW = \angle MHY$  and  $\angle(AW, HY) = \angle WMY \Rightarrow AW$  is perpendicular to  $HY$ .
- Step 35.  $AW$  is perpendicular to  $HY$  and  $NW$  is perpendicular to  $NX \Rightarrow \angle(AW, HY) = \angle WNX$ .
- Step 36.  $\angle(AW, HX) = \angle WNX$  and  $\angle(AW, HY) = \angle WNX \Rightarrow \angle(AW, HX) = \angle(AW, HY)$ .
- Step 37.  $\angle(AW, HX) = \angle(AW, HY) \Rightarrow HX$  is parallel to  $HY$ .
- Step 38.  $HX$  is parallel to  $HY \Rightarrow H, X, Y$  are collinear
- 

## 2.20 IMO 2014 P4

### Original:

Let  $P$  and  $Q$  be on segment  $BC$  of a triangle  $ABC$  such that  $\angle PAB = \angle BCA$  and  $\angle CAQ = \angle ABC$ . Let  $M$  and  $N$  be the points on  $AP$  and  $AQ$ , respectively, such that  $P$  is the midpoint of  $AM$  and  $Q$  is the midpoint of  $AN$ . Prove that the intersection of  $BM$  and  $CN$  is on the circumference of triangle  $ABC$ .

### Translated:

Let  $ABC$  be a triangle. Define point  $P$  on line  $BC$  such that  $\angle BAC = \angle(AP, BC)$ . Define point  $Q$  on line  $BC$  such that  $\angle CAB = \angle(AQ, BC)$  and  $\angle ABC = \angle CAQ$ . Define point  $M$  as the mirror of  $A$  through  $P$ . Define point  $N$  as the mirror of  $A$  through  $Q$ . Define point  $X$  as the intersection of lines  $BM$  and  $CN$ . Define point  $O$  as the circumcenter of triangle  $CBA$ . Prove that  $AO = XO$

### Proof:

Construct point  $L$  as the mirror of  $C$  through  $O$ .

Step 1.  $B, C, P$  are collinear,  $B, C, Q$  are collinear,  $\angle BAC = \angle(AP, BC)$  and  $\angle CAB = \angle(AQ, BC) \Rightarrow \angle AQC = \angle BPA$ .

Step 2.  $B, C, P$  are collinear and  $\angle ABC = \angle CAQ \Rightarrow \angle ABP = \angle CAQ$ .

Step 3.  $\angle ABP = \angle CAQ$  and  $\angle AQC = \angle BPA \Rightarrow \frac{QA}{QC} = \frac{PB}{PA}$ .

Step 4.  $AP = PM$ ,  $AQ = QN$  and  $\frac{QA}{QC} = \frac{PB}{PA} \Rightarrow \frac{PB}{PM} = \frac{QN}{QC}$ .

Step 5.  $A, P, M$  are collinear,  $A, Q, N$  are collinear,  $B, C, P$  are collinear,  $B, C, Q$  are collinear,  $\angle BAC = \angle(AP, BC)$  and  $\angle CAB = \angle(AQ, BC) \Rightarrow \angle BPM = \angle NQC$ .

Step 6.  $\angle BPM = \angle NQC$  and  $\frac{PB}{PM} = \frac{QN}{QC} \Rightarrow \angle BMP = \angle NCQ$ .

Step 7.  $A, P, M$  are collinear,  $B, C, Q$  are collinear,  $B, M, X$  are collinear,  $C, N, X$  are collinear,  $\angle BAC = \angle(AP, BC)$  and  $\angle BMP = \angle NCQ \Rightarrow \angle BAC =$



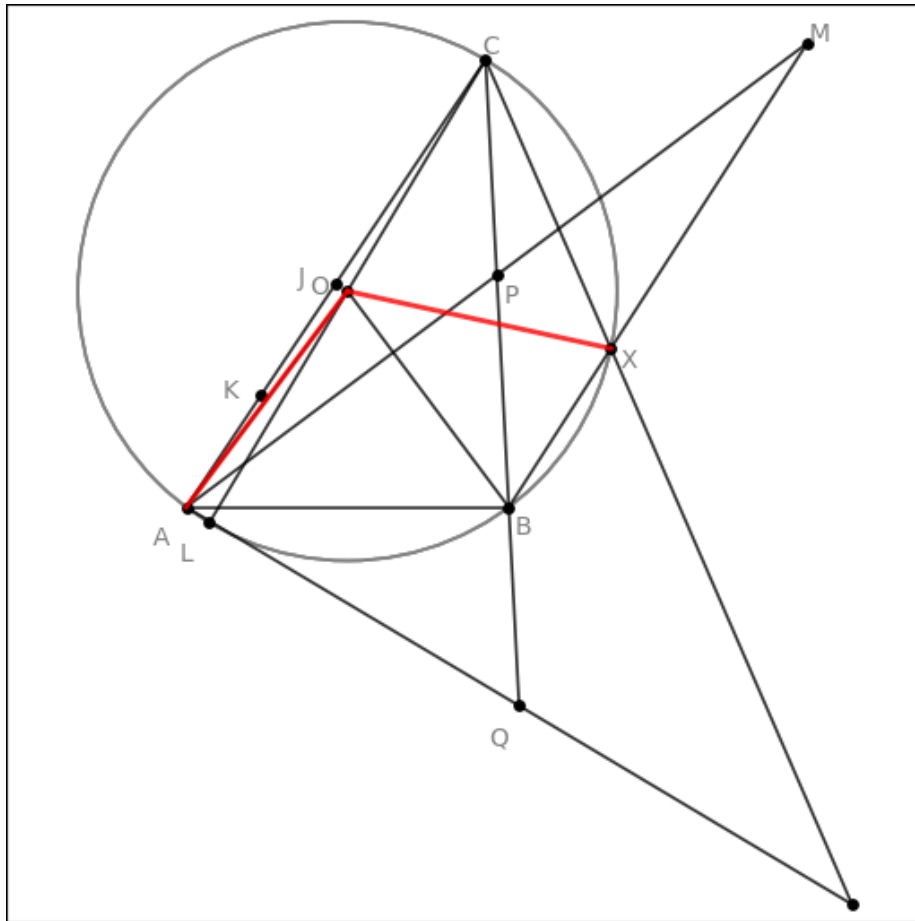

Figure 20: imo 2014 p4

$\angle BXC$ .

Step 8.  $\angle BAC = \angle BXC \Rightarrow A, B, C, X$  are cyclic.

Step 9.  $AO = BO, BO = CO, CO = OL$  and  $A, B, C, X$  are cyclic  $\Rightarrow A, C, X, L$  are cyclic.

Step 10.  $A, C, X, L$  are cyclic  $\Rightarrow \angle ACX = \angle ALX$ .

Step 11.  $AO = BO, BO = CO, CO = OL$  and  $A, B, C, X$  are cyclic  $\Rightarrow B, C, X, L$  are cyclic.

Step 12.  $B, C, X, L$  are cyclic  $\Rightarrow \angle BCX = \angle BLX$ .

Step 13.  $BO = CO$  and  $CO = OL \Rightarrow O$  is the circumcenter of  $BCL$ .

Step 14.  $O$  is the circumcenter of  $BCL$  and  $C, O, L$  are collinear  $\Rightarrow BC$  is perpendicular to  $BL$ .

Step 15.  $AO = BO, BO = CO$  and  $CO = OL \Rightarrow O$  is the circumcenter of  $ACL$ .

Step 16.  $O$  is the circumcenter of  $ACL$  and  $C, O, L$  are collinear  $\Rightarrow AC$  is perpendicular to  $AL$ .

Step 17.  $B, C, Q$  are collinear and  $BC$  is perpendicular to  $BL \Rightarrow BQ$  is perpendicular to  $BL$ .

Step 18.  $AC$  is perpendicular to  $AL$  and  $BQ$  is perpendicular to  $BL \Rightarrow \angle(AC, BL) = \angle(AL, BQ)$ .

Step 19.  $B, C, Q$  are collinear,  $\angle(AC, BL) = \angle(AL, BQ)$ ,  $\angle ACX = \angle ALX$  and  $\angle BCX = \angle BLX \Rightarrow CX$  is perpendicular to  $XL$ .

Step 20.  $C, O, L$  are collinear and  $CO = OL \Rightarrow O$  is the midpoint of  $CL$ .

Step 21.  $O$  is the midpoint of  $CL$  and  $CX$  is perpendicular to  $XL \Rightarrow CO = XO$ .

Step 22.  $AO = BO$ ,  $BO = CO$  and  $CO = XO \Rightarrow AO = XO$

■

## 2.21 IMO 2015 P3

### Original:

Let  $ABC$  be a triangle with  $AB \neq AC$ . Let  $\Gamma$  be its circumcircle,  $H$  its orthocenter, and  $F$  the foot of the altitude from  $A$ . Let  $M$  be the midpoint of  $BC$ . Let  $Q$  be the point on  $\Gamma$  such that  $\angle HQA = 90^\circ$  and let  $K$  be the point on  $\Gamma$  such that  $\angle HKQ = 90^\circ$ . Assume that the points  $A, B, C, K$  and  $Q$  are all different and lie on  $\Gamma$  in this order. Prove that the circumcircles of triangles  $KQH$  and  $FKM$  are tangent to each other.

### Translated:

Let  $ABC$  be a triangle. Define point  $H$  as the orthocenter of triangle  $CBA$ . Define point  $F$  as the intersection of lines  $AH$  and  $BC$ . Define point  $M$  as the midpoint of  $BC$ . Define point  $O$  as the circumcenter of triangle  $CBA$ . Define point  $Q$  on circle  $(O, A)$  such that  $AQ$  is perpendicular to  $HQ$ . Define point  $K$  on circle  $(O, A)$  such that  $HK$  is perpendicular to  $KQ$ . Define point  $O_1$  as the circumcenter of triangle  $KHQ$ . Define point  $O_2$  as the circumcenter of triangle  $FMK$ . Prove that  $K, O_1, O_2$  are collinear

### Proof:

Construct point  $X$  as the midpoint of  $CH$ .

Construct point  $Y$  as the midpoint of  $KM$ .

Construct point  $Z$  as the midpoint of  $BH$ .

Step 1.  $B, C, M$  are collinear and  $AH$  is perpendicular to  $BC \Rightarrow AH$  is perpendicular to  $CM$ .

Step 2.  $B, H, Z$  are collinear and  $AC$  is perpendicular to  $BH \Rightarrow AC$  is perpendicular to  $HZ$ .

Step 3.  $AC$  is perpendicular to  $HZ$  and  $AH$  is perpendicular to  $CM \Rightarrow \angle HAC = \angle(CM, HZ)$  and  $\angle AHZ = \angle MCA$ .

Step 4.  $A, F, H$  are collinear,  $B, C, F$  are collinear,  $B, C, M$  are collinear,  $B, H, Z$  are collinear and  $\angle HAC = \angle(CM, HZ) \Rightarrow \angle CAF = \angle HBF$ .

Step 5.  $A, F, H$  are collinear,  $B, C, F$  are collinear and  $AH$  is perpendicular to  $BC \Rightarrow \angle AFC = \angle BFH$ .

Step 6.  $\angle CAF = \angle HBF$  and  $\angle AFC = \angle BFH \Rightarrow \frac{FA}{FB} = \frac{FC}{FH}$ .



Step 16.  $AQ$  is perpendicular to  $HQ$  and  $HK$  is perpendicular to  $KQ \Rightarrow \angle AQH = \angle QKH$ .

Step 17.  $O_1$  is the circumcenter of  $HKQ$  and  $\angle AQH = \angle QKH \Rightarrow AQ$  is perpendicular to  $O_1Q$ .

Step 18.  $HO_1 = O_1Q$ ,  $AQ$  is perpendicular to  $HQ$  and  $AQ$  is perpendicular to  $O_1Q \Rightarrow O_1$  is the midpoint of  $HQ$ .

Step 19.  $O_1$  is the midpoint of  $HQ$  and  $X$  is the midpoint of  $CH \Rightarrow CQ$  is parallel to  $O_1X$ .

Step 20.  $O_1$  is the midpoint of  $HQ$  and  $Z$  is the midpoint of  $BH \Rightarrow BQ$  is parallel to  $O_1Z$ .

Step 21.  $AO = BO$ ,  $AO = OQ$  and  $BO = CO \Rightarrow A, B, C, Q$  are cyclic.

Step 22.  $A, B, C, Q$  are cyclic  $\Rightarrow \angle ABQ = \angle ACQ$  and  $\angle ACB = \angle AQB$ .

Step 23.  $A, F, H$  are collinear,  $B, C, F$  are collinear,  $B, C, M$  are collinear,  $B, H, Z$  are collinear,  $\angle BAF = \angle HCF$ ,  $\angle HAC = \angle (CM, HZ)$ ,  $BH$  is parallel to  $MX$  and  $CH$  is parallel to  $MZ \Rightarrow \angle (AB, MZ) = \angle (AC, MX)$ .

Step 24.  $\angle ABQ = \angle ACQ$ ,  $BQ$  is parallel to  $O_1Z$  and  $CQ$  is parallel to  $O_1X \Rightarrow \angle (AB, O_1Z) = \angle (AC, O_1X)$ .

Step 25.  $\angle (AB, MZ) = \angle (AC, MX)$  and  $\angle (AB, O_1Z) = \angle (AC, O_1X) \Rightarrow \angle XMZ = \angle XO_1Z$ .

Step 26.  $\angle XMZ = \angle XO_1Z \Rightarrow M, O_1, X, Z$  are cyclic.

Step 27.  $A, F, H$  are collinear,  $B, C, F$  are collinear and  $AH$  is perpendicular to  $BC \Rightarrow BF$  is perpendicular to  $FH$ .

Step 28.  $Z$  is the midpoint of  $BH$  and  $BF$  is perpendicular to  $FH \Rightarrow BZ = FZ$ .

Step 29.  $BZ = FZ \Rightarrow \angle BFZ = \angle ZBF$ .

Step 30.  $X$  is the midpoint of  $CH$  and  $Z$  is the midpoint of  $BH \Rightarrow BC$  is parallel to  $XZ$ .

Step 31.  $B, C, F$  are collinear,  $B, C, M$  are collinear,  $B, H, Z$  are collinear,  $\angle BFZ = \angle ZBF$ ,  $BC$  is parallel to  $XZ$  and  $BH$  is parallel to  $MX \Rightarrow \angle MFZ = \angle MXZ$ .

Step 32.  $\angle MFZ = \angle MXZ \Rightarrow F, M, X, Z$  are cyclic.

Step 33.  $F, M, X, Z$  are cyclic and  $M, O_1, X, Z$  are cyclic  $\Rightarrow F, M, O_1, X$  are cyclic.

Step 34.  $F, M, O_1, X$  are cyclic and  $F, M, X, Z$  are cyclic  $\Rightarrow F, O_1, X, Z$  are cyclic.

Step 35.  $F, O_1, X, Z$  are cyclic  $\Rightarrow \angle O_1FX = \angle O_1ZX$ .

Step 36.  $AC$  is perpendicular to  $HZ$  and  $AQ$  is perpendicular to  $HQ \Rightarrow \angle CAQ = \angle ZHQ$  and  $\angle (AC, HQ) = \angle (HZ, AQ)$ .

Step 37.  $B, H, Z$  are collinear,  $\angle CAQ = \angle ZHQ$ ,  $BH$  is parallel to  $MX$ ,  $AQ$  is perpendicular to  $HQ$  and  $AQ$  is perpendicular to  $O_1Q \Rightarrow \angle (AC, MX) = \angle (AQ, HO_1)$ .

Step 38.  $B, C, M$  are collinear and  $\angle ACB = \angle AQB \Rightarrow \angle ACM = \angle AQB$ .

Step 39.  $\angle (AC, MX) = \angle (AQ, HO_1)$  and  $\angle ACM = \angle AQB \Rightarrow \angle (BQ, HO_1) = \angle CMX$ .

Step 40.  $AO = BO$  and  $BO = CO \Rightarrow O$  is the circumcenter of  $ABC$ .

Step 41.  $O$  is the circumcenter of  $ABC$  and  $M$  is the midpoint of  $BC \Rightarrow \angle(AB, MO) = \angle ACO$  and  $\angle BAC = \angle MOC$ .

Step 42.  $AO = BO$  and  $BO = CO \Rightarrow AO = CO$ .

Step 43.  $AO = CO \Rightarrow \angle ACO = \angle OAC$ .

Step 44.  $B, H, Z$  are collinear,  $\angle HAC = \angle(CM, HZ)$  and  $BH$  is parallel to  $MX \Rightarrow \angle(AC, MX) = \angle(AH, CM)$ .

Step 45.  $\angle(AB, MO) = \angle ACO$ ,  $\angle ACO = \angle OAC$ ,  $AH$  is perpendicular to  $BC$  and  $BC$  is perpendicular to  $MO \Rightarrow \angle BAH = \angle OAC$ .

Step 46.  $\angle BAH = \angle OAC$  and  $\angle(AC, MX) = \angle(AH, CM) \Rightarrow \angle(AB, CM) = \angle(AO, MX)$ .

Step 47.  $A, F, H$  are collinear,  $B, C, F$  are collinear and  $AH$  is perpendicular to  $BC \Rightarrow CF$  is perpendicular to  $FH$ .

Step 48.  $X$  is the midpoint of  $CH$  and  $CF$  is perpendicular to  $FH \Rightarrow FX = HX$ .

Step 49.  $FX = HX \Rightarrow \angle FHX = \angle XFH$ .

Step 50.  $B, C, M$  are collinear,  $\angle(BQ, HO_1) = \angle CMX$ ,  $\angle O_1FX = \angle O_1ZX$ ,  $BC$  is parallel to  $XZ$  and  $BQ$  is parallel to  $O_1Z \Rightarrow \angle O_1FX = \angle(HO_1, MX)$ .

Step 51.  $A, F, H$  are collinear,  $B, C, F$  are collinear,  $B, C, M$  are collinear,  $C, H, X$  are collinear,  $\angle(AB, CM) = \angle(AO, MX)$ ,  $\angle ABF = \angle CHF$  and  $\angle FHX = \angle XFH \Rightarrow \angle(AH, FX) = \angle(AO, MX)$ .

Step 52.  $\angle(AH, FX) = \angle(AO, MX)$  and  $\angle O_1FX = \angle(HO_1, MX) \Rightarrow \angle(AH, FO_1) = \angle(AO, HO_1)$ .

Step 53.  $B, C, M$  are collinear,  $B, H, Z$  are collinear,  $\angle ACB = \angle AQB$ ,  $\angle AHZ = \angle MCA$  and  $BH$  is parallel to  $MX \Rightarrow \angle(AH, MX) = \angle BQA$ .

Step 54.  $B, H, Z$  are collinear,  $\angle(AC, HQ) = \angle(HZ, AQ)$ ,  $BH$  is parallel to  $MX$ ,  $AQ$  is perpendicular to  $HQ$  and  $AQ$  is perpendicular to  $O_1Q \Rightarrow \angle(AC, MX) = \angle(HO_1, AQ)$ .

Step 55.  $\angle(AC, MX) = \angle(HO_1, AQ)$  and  $\angle(AH, MX) = \angle BQA \Rightarrow \angle HAC = \angle(BQ, HO_1)$ .

Step 56.  $AO = BO$ ,  $AO = OQ$  and  $BO = CO \Rightarrow O$  is the circumcenter of  $BCQ$ .

Step 57.  $O$  is the circumcenter of  $BCQ$  and  $M$  is the midpoint of  $BC \Rightarrow \angle(BQ, MO) = \angle QCO$ .

Step 58.  $\angle HAC = \angle(BQ, HO_1)$ ,  $\angle(BQ, MO) = \angle QCO$ ,  $CQ$  is parallel to  $O_1X$ ,  $AH$  is perpendicular to  $BC$  and  $BC$  is perpendicular to  $MO \Rightarrow \angle(AC, HO_1) = \angle(CO, O_1X)$ .

Step 59.  $\angle BAC = \angle MOC$ ,  $AH$  is perpendicular to  $BC$  and  $BC$  is perpendicular to  $MO \Rightarrow \angle BAC = \angle(AH, CO)$ .

Step 60.  $\angle BAC = \angle(AH, CO)$  and  $\angle(AC, HO_1) = \angle(CO, O_1X) \Rightarrow \angle(AB, HO_1) = \angle(AH, O_1X)$ .

Step 61.  $A, F, H$  are collinear,  $B, C, F$  are collinear,  $B, C, M$  are collinear,  $\angle BAF = \angle HCF$  and  $CH$  is parallel to  $MZ \Rightarrow \angle(AB, MZ) = \angle(AH, CM)$ .

Step 62.  $\angle(AB, HO_1) = \angle(AH, O_1X)$  and  $\angle(AB, MZ) = \angle(AH, CM) \Rightarrow \angle(CM, O_1X) = \angle(MZ, HO_1)$ .

Step 63.  $M, O_1, X, Z$  are cyclic  $\Rightarrow \angle O_1MZ = \angle O_1XZ$ .

Step 64.  $B, C, M$  are collinear,  $\angle(CM, O_1X) = \angle(MZ, HO_1)$ ,  $\angle O_1MZ = \angle O_1XZ$  and  $BC$  is parallel to  $XZ \Rightarrow \angle(HO_1, MZ) = \angle O_1MZ$ .

Step 65.  $\angle(HO_1, MZ) = \angle O_1MZ \Rightarrow HO_1$  is parallel to  $MO_1$ .

Step 66.  $HO_1$  is parallel to  $MO_1 \Rightarrow H, M, O_1$  are collinear.

Step 67.  $AH$  is perpendicular to  $CM$  and  $AQ$  is perpendicular to  $HQ \Rightarrow \angle HAQ = \angle(CM, HQ)$ .

Step 68.  $A, F, H$  are collinear,  $B, C, F$  are collinear,  $B, C, M$  are collinear,  $H, M, O_1$  are collinear,  $\angle HAQ = \angle(CM, HQ)$ ,  $AQ$  is perpendicular to  $HQ$  and  $AQ$  is perpendicular to  $O_1Q \Rightarrow \angle AFM = \angle AQM$ .

Step 69.  $\angle AFM = \angle AQM \Rightarrow A, F, M, Q$  are cyclic.

Step 70.  $A, F, M, Q$  are cyclic  $\Rightarrow \angle AFQ = \angle AMQ$ .

Step 71.  $\angle(AH, FO_1) = \angle(AO, HO_1)$ ,  $AH$  is perpendicular to  $BC$ ,  $AQ$  is perpendicular to  $HQ$ ,  $AQ$  is perpendicular to  $O_1Q$  and  $BC$  is perpendicular to  $MO \Rightarrow \angle AOM = \angle QO_1F$ .

Step 72.  $A, F, H$  are collinear,  $H, M, O_1$  are collinear,  $\angle AFQ = \angle AMQ$ ,  $AH$  is perpendicular to  $BC$ ,  $AQ$  is perpendicular to  $HQ$ ,  $AQ$  is perpendicular to  $O_1Q$  and  $BC$  is perpendicular to  $MO \Rightarrow \angle AMO = \angle O_1QF$ .

Step 73.  $\angle AMO = \angle O_1QF$  and  $\angle AOM = \angle QO_1F \Rightarrow \frac{OA}{OM} = \frac{O_1F}{O_1Q}$ .

Step 74.  $F, M, O_1, X$  are cyclic  $\Rightarrow \angle MFO_1 = \angle MXO_1$ .

Step 75.  $AO = KO$  and  $AO = OQ \Rightarrow KO = OQ$ .

Step 76.  $KO = OQ$  and  $KO_1 = O_1Q \Rightarrow O_1O$  is the bisector of  $\angle KO_1Q$ .

Step 77.  $KO = OQ$  and  $KO_1 = O_1Q \Rightarrow KQ$  is perpendicular to  $OO_1$ .

Step 78.  $AO = BO$ ,  $AO = KO$  and  $BO = CO \Rightarrow A, B, C, K$  are cyclic.

Step 79.  $A, B, C, K$  are cyclic and  $A, B, C, Q$  are cyclic  $\Rightarrow A, C, K, Q$  are cyclic.

Step 80.  $A, C, K, Q$  are cyclic  $\Rightarrow \angle ACK = \angle AQK$  and  $\angle CAK = \angle CQK$ .

Step 81.  $AC$  is perpendicular to  $HZ$  and  $HK$  is perpendicular to  $KQ \Rightarrow \angle(AC, HK) = \angle(HZ, KQ)$ .

Step 82.  $\angle ACK = \angle AQK$ ,  $O_1O$  is the bisector of  $\angle KO_1Q$ ,  $AQ$  is perpendicular to  $O_1Q$  and  $KQ$  is perpendicular to  $OO_1 \Rightarrow \angle ACK = \angle OO_1K$ .

Step 83.  $B, H, Z$  are collinear,  $\angle(AC, HK) = \angle(HZ, KQ)$ ,  $BH$  is parallel to  $MX$ ,  $HK$  is perpendicular to  $KQ$  and  $KQ$  is perpendicular to  $OO_1 \Rightarrow \angle(AC, MX) = \angle(OO_1, KQ)$ .

Step 84.  $\angle(AC, MX) = \angle(OO_1, KQ)$  and  $\angle ACK = \angle OO_1K \Rightarrow \angle(CK, MX) = \angle O_1KQ$ .

Step 85.  $A, B, C, K$  are cyclic  $\Rightarrow \angle ACB = \angle AKB$ .

Step 86.  $AO = BO$ ,  $AO = KO$  and  $BO = CO \Rightarrow O$  is the circumcenter of  $BCK$ .

Step 87.  $O$  is the circumcenter of  $BCK$  and  $M$  is the midpoint of  $BC \Rightarrow \angle KBO = \angle(CK, MO)$ .

Step 88.  $AO = BO$  and  $AO = KO \Rightarrow BO = KO$ .

Step 89.  $BO = KO \Rightarrow \angle BKO = \angle OBK$ .

Step 90.  $B, C, M$  are collinear,  $B, H, Z$  are collinear,  $\angle ACB = \angle AKB$ ,  $\angle AHZ = \angle MCA$  and  $BH$  is parallel to  $MX \Rightarrow \angle(AH, MX) = \angle BKA$ .

Step 91.  $\angle KBO = \angle(CK, MO)$ ,  $\angle BKO = \angle OBK$ ,  $AH$  is perpendicular to  $BC$  and  $BC$  is perpendicular to  $MO \Rightarrow \angle(AH, CK) = \angle BKO$ .

Step 92.  $\angle(AH, CK) = \angle BKO$  and  $\angle(AH, MX) = \angle BKA \Rightarrow \angle AKO = \angle(MX, CK)$ .

Step 93.  $\angle(CK, MX) = \angle O_1KQ$  and  $\angle AKO = \angle(MX, CK) \Rightarrow \angle AKO = \angle QKO_1$ .

Step 94.  $\angle CAK = \angle CQK$  and  $CQ$  is parallel to  $O_1X \Rightarrow \angle CAK = \angle(O_1X, KQ)$ .

Step 95.  $\angle CAK = \angle(O_1X, KQ)$  and  $\angle AKO = \angle QKO_1 \Rightarrow \angle(AC, KO) = \angle XO_1K$ .

Step 96.  $B, C, F$  are collinear,  $B, C, M$  are collinear,  $B, H, Z$  are collinear,  $\angle HAC = \angle(CM, HZ)$ ,  $\angle MFO_1 = \angle MXO_1$  and  $BH$  is parallel to  $MX \Rightarrow \angle CAH = \angle XO_1F$ .

Step 97.  $\angle CAH = \angle XO_1F$  and  $\angle(AC, KO) = \angle XO_1K \Rightarrow \angle(AH, KO) = \angle FO_1K$ .

Step 98.  $AO = KO$ ,  $KO_1 = O_1Q$  and  $\frac{OA}{OM} = \frac{O_1F}{O_1Q} \Rightarrow \frac{O_1F}{O_1K} = \frac{OK}{OM}$ .

Step 99.  $\angle(AH, KO) = \angle FO_1K$ ,  $AH$  is perpendicular to  $BC$  and  $BC$  is perpendicular to  $MO \Rightarrow \angle FO_1K = \angle MOK$ .

Step 100.  $\angle FO_1K = \angle MOK$  and  $\frac{O_1F}{O_1K} = \frac{OK}{OM} \Rightarrow \angle FKO_1 = \angle OMK$ .

Step 101.  $KO_2 = MO_2$  and  $KY = MY \Rightarrow KM$  is perpendicular to  $O_2Y$ .

Step 102.  $FO_2 = KO_2$  and  $KO_2 = MO_2 \Rightarrow O_2$  is the circumcenter of  $FKM$ .

Step 103.  $K, M, Y$  are collinear and  $KY = MY \Rightarrow Y$  is the midpoint of  $KM$ .

Step 104.  $O_2$  is the circumcenter of  $FKM$  and  $Y$  is the midpoint of  $KM \Rightarrow \angle KFM = \angle KO_2Y$ .

Step 105.  $B, C, M$  are collinear,  $K, M, Y$  are collinear,  $AH$  is perpendicular to  $BC$  and  $KM$  is perpendicular to  $O_2Y \Rightarrow \angle(AH, CM) = \angle KYO_2$ .

Step 106.  $B, C, F$  are collinear,  $B, C, M$  are collinear and  $\angle KFM = \angle KO_2Y \Rightarrow \angle(CM, FK) = \angle YO_2K$ .

Step 107.  $\angle(AH, CM) = \angle KYO_2$  and  $\angle(CM, FK) = \angle YO_2K \Rightarrow \angle(AH, FK) = \angle YKO_2$ .

Step 108.  $K, M, Y$  are collinear,  $\angle(AH, FK) = \angle YKO_2$ ,  $\angle FKO_1 = \angle OMK$ ,  $AH$  is perpendicular to  $BC$  and  $BC$  is perpendicular to  $MO \Rightarrow \angle FKO_1 = \angle FKO_2$ .

Step 109.  $\angle FKO_1 = \angle FKO_2 \Rightarrow KO_1$  is parallel to  $KO_2$ .

Step 110.  $KO_1$  is parallel to  $KO_2 \Rightarrow K, O_1, O_2$  are collinear

■

## 2.22 IMO 2015 P4

### Original:

Triangle  $ABC$  has circumcircle  $\Omega$  and circumcenter  $O$ . A circle  $\Gamma$  with center  $A$  intersects the segment  $BC$  at points  $D$  and  $E$ , such that  $B, D, E$ , and  $C$  are all different and lie on line  $BC$  in this order. Let  $F$  and  $G$  be the points of intersection of  $\Gamma$  and  $\Omega$ , such that  $A, F, B, C$ , and  $G$  lie on  $\Omega$  in this order. Let  $K = (BDF) \cap AB \neq B$  and  $L = (CGE) \cap AC \neq C$

and assume these points do not lie on line  $FG$ . Define  $X = FK \cap GL$ . Prove that  $X$  lies on the line  $AO$ .

**Translated:**

Let  $ABC$  be a triangle. Define point  $O$  as the circumcenter of triangle  $CBA$ . Let  $D$  be any point on line  $BC$ . Define point  $E$  as the intersection of circle  $(A, D)$  and line  $BC$ . Define point  $F$  as the intersection of circles  $(A, D)$  and  $(O, A)$ . Define point  $G$  as the intersection of circles  $(A, D)$  and  $(O, A)$ . Define point  $O_1$  as the circumcenter of triangle  $FBD$ . Define point  $O_2$  as the circumcenter of triangle  $ECG$ . Define point  $K$  as the intersection of circle  $(O_1, B)$  and line  $AB$ . Define point  $L$  as the intersection of circle  $(O_2, C)$  and line  $AC$ . Define point  $X$  as the intersection of lines  $FK$  and  $GL$ . Prove that  $A, O, X$  are collinear

**Proof:**

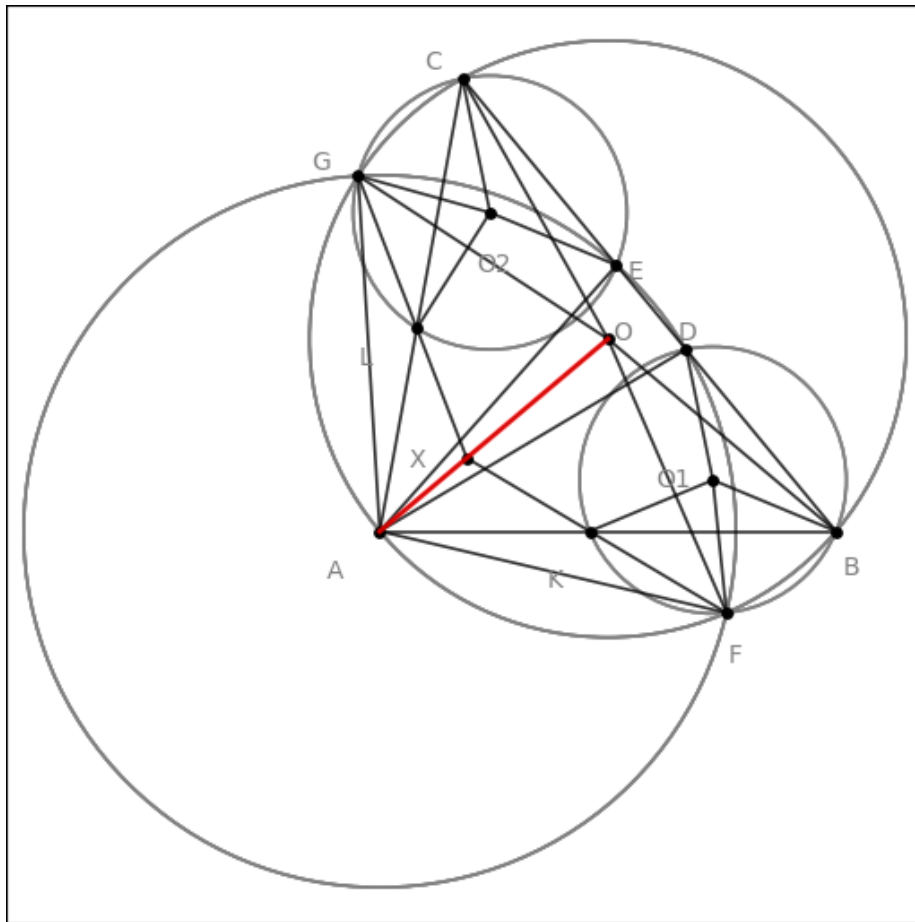

Figure 22: imo 2015 p4

Step 1.  $AO = BO, AO = FO, AO = GO$  and  $BO = CO \Rightarrow A, C, F, G$  are



cyclic.

Step 2.  $AO = BO$ ,  $AO = FO$ ,  $BO = CO$  and  $A, C, F, G$  are cyclic  $\Rightarrow$   $A, B, F, G$  are cyclic.

Step 3.  $A, B, F, G$  are cyclic  $\Rightarrow \angle ABF = \angle AGF$ .

Step 4.  $A, C, F, G$  are cyclic  $\Rightarrow \angle ACG = \angle AFG$ .

Step 5.  $BO_1 = DO_1$ ,  $BO_1 = FO_1$  and  $BO_1 = KO_1 \Rightarrow B, D, F, K$  are cyclic.

Step 6.  $B, D, F, K$  are cyclic  $\Rightarrow \angle BFD = \angle BKD$  and  $\angle BDK = \angle BFK$ .

Step 7.  $AD = AF$  and  $AD = AG \Rightarrow AF = AG$ .

Step 8.  $AF = AG \Rightarrow \angle AFG = \angle FGA$ .

Step 9.  $A, B, F, G$  are cyclic and  $A, C, F, G$  are cyclic  $\Rightarrow B, C, F, G$  are cyclic.

Step 10.  $B, C, F, G$  are cyclic  $\Rightarrow \angle CBF = \angle CGF$ .

Step 11.  $A, B, K$  are collinear,  $A, C, L$  are collinear,  $\angle ABF = \angle AGF$ ,  $\angle ACG = \angle AFG$ ,  $\angle AFG = \angle FGA$  and  $\angle BFD = \angle BKD \Rightarrow \angle (AL, CG) = \angle FDK$ .

Step 12.  $B, C, D$  are collinear,  $F, K, X$  are collinear,  $\angle CBF = \angle CGF$  and  $\angle BDK = \angle BFK \Rightarrow \angle CGF = \angle (DK, FX)$ .

Step 13.  $\angle (AL, CG) = \angle FDK$  and  $\angle CGF = \angle (DK, FX) \Rightarrow \angle (AL, FG) = \angle DFX$ .

Step 14.  $CO_2 = EO_2$ ,  $CO_2 = GO_2$  and  $CO_2 = LO_2 \Rightarrow C, E, G, L$  are cyclic.

Step 15.  $C, E, G, L$  are cyclic  $\Rightarrow \angle ECL = \angle EGL$ .

Step 16.  $AD = AE$ ,  $AD = AF$  and  $AD = AG \Rightarrow D, E, F, G$  are cyclic.

Step 17.  $D, E, F, G$  are cyclic  $\Rightarrow \angle EDF = \angle EGF$ .

Step 18.  $A, C, L$  are collinear,  $B, C, E$  are collinear,  $G, L, X$  are collinear and  $\angle ECL = \angle EGL \Rightarrow \angle (AL, BE) = \angle XGE$ .

Step 19.  $B, C, D$  are collinear,  $B, C, E$  are collinear and  $\angle EDF = \angle EGF \Rightarrow \angle (BE, DF) = \angle EGF$ .

Step 20.  $\angle (AL, BE) = \angle XGE$  and  $\angle (BE, DF) = \angle EGF \Rightarrow \angle (AL, DF) = \angle XGF$ .

Step 21.  $\angle (AL, DF) = \angle XGF$  and  $\angle (AL, FG) = \angle DFX \Rightarrow \angle FGX = \angle XFG$ .

Step 22.  $\angle FGX = \angle XFG \Rightarrow FX = GX$ .

Step 23.  $AF = AG$  and  $FX = GX \Rightarrow AX$  is perpendicular to  $FG$ .

Step 24.  $AO = FO$  and  $AO = GO \Rightarrow FO = GO$ .

Step 25.  $AF = AG$  and  $FO = GO \Rightarrow AO$  is perpendicular to  $FG$ .

Step 26.  $AO$  is perpendicular to  $FG$  and  $AX$  is perpendicular to  $FG \Rightarrow A, O, X$  are collinear

■

## 2.23 IMO 2016 P1

**Original:**

In convex pentagon  $ABCDE$  with  $\angle B > 90^\circ$ , let  $F$  be a point on  $AC$  such that  $\angle FBC = 90^\circ$ . It is given that  $FA = FB$ ,  $DA = DC$ ,  $EA = ED$ , and rays  $AC$  and  $AD$  trisect  $\angle BAE$ . Let  $M$  be the midpoint of  $CF$ . Let  $X$  be the point such that  $AMXE$  is a parallelogram. Show that  $FX$ ,  $EM$ ,  $BD$  are concurrent.

**Translated:**

Let  $ABZ$  be a triangle. Define point  $F$  such that  $AF = BF$ ,  $AF$  is the bisector of  $\angle BAZ$  and  $\angle ABF = \angle FAB$ . Define point  $C$  on line  $AF$  such that  $BC$  is perpendicular to  $BF$ . Define point  $D$  on line  $AZ$  such that  $AD = CD$  and  $\angle ACD = \angle DAC$ . Define point  $E$  such that  $AE = DE$ ,  $AD$  is the bisector of  $\angle CAE$  and  $\angle ADE = \angle EAD$ . Define point  $M$  as the midpoint of  $CF$ . Define point  $X$  such that  $AE$  is parallel to  $MX$  and  $AM$  is parallel to  $EX$ . Define point  $Y$  as the intersection of lines  $EM$  and  $FX$ . Prove that  $B, D, Y$  are collinear

**Proof:**

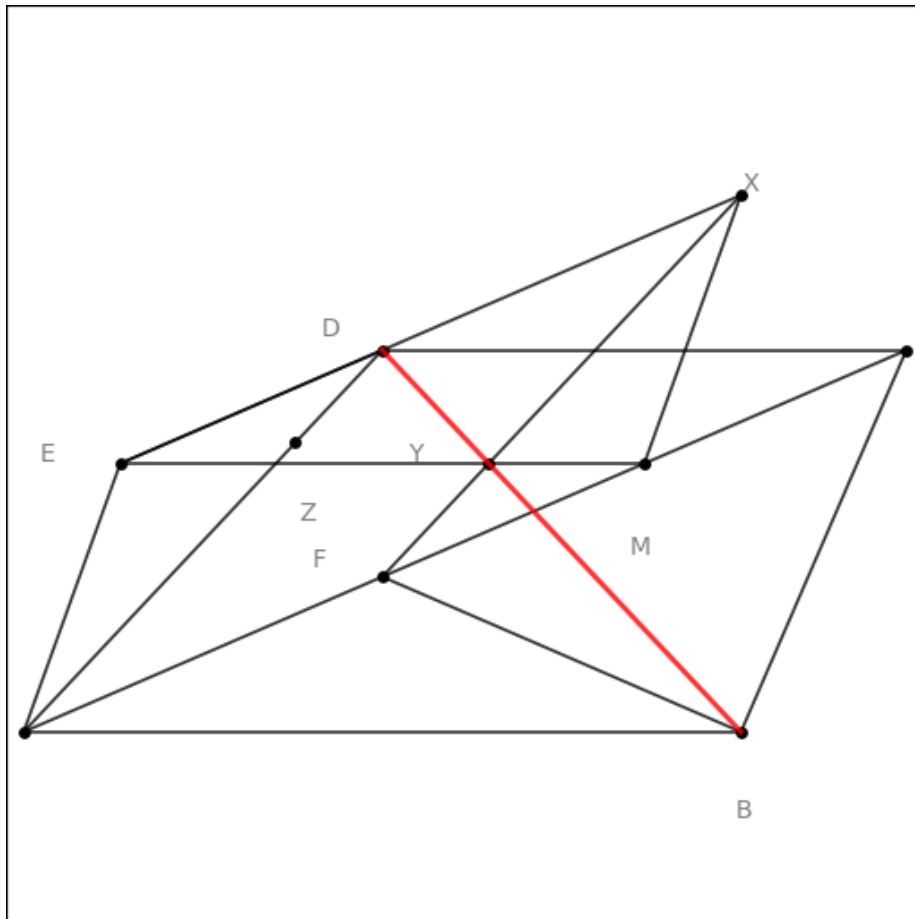

Figure 23: imo 2016 p1

Step 1.  $A, C, F$  are collinear,  $A, D, Z$  are collinear,  $AD$  is the bisector of  $\angle CAE$  and  $AE$  is parallel to  $MX \Rightarrow \angle(CF, DZ) = \angle(DZ, MX)$ .

Step 2.  $A, C, F$  are collinear,  $A, D, Z$  are collinear and  $\angle ACD = \angle DAC \Rightarrow \angle DCF = \angle(CF, DZ)$ .

Step 3.  $\angle DCF = \angle (CF, DZ)$  and  $\angle (CF, DZ) = \angle (DZ, MX) \Rightarrow \angle CDZ = \angle (CF, MX)$ .

Step 4.  $A, C, F$  are collinear,  $A, D, Z$  are collinear,  $AF$  is the bisector of  $\angle BAZ$  and  $\angle ACD = \angle DAC \Rightarrow \angle (AB, CF) = \angle DCF$ .

Step 5.  $\angle (AB, CF) = \angle DCF \Rightarrow AB$  is parallel to  $CD$ .

Step 6.  $A, C, F$  are collinear,  $AD$  is the bisector of  $\angle CAE$  and  $\angle ADE = \angle EAD \Rightarrow \angle (CF, DZ) = \angle EDZ$ .

Step 7.  $\angle (CF, DZ) = \angle EDZ \Rightarrow CF$  is parallel to  $DE$ .

Step 8.  $A, C, F$  are collinear,  $A, D, Z$  are collinear,  $\angle CDZ = \angle (CF, MX)$ ,  $AB$  is parallel to  $CD$  and  $AE$  is parallel to  $MX \Rightarrow \angle BAF = \angle DAE$ .

Step 9.  $A, C, F$  are collinear,  $\angle BAF = \angle DAE$ ,  $\angle ADE = \angle EAD$  and  $CF$  is parallel to  $DE \Rightarrow \angle BAF = \angle CAD$ .

Step 10.  $A, C, F$  are collinear,  $A, D, Z$  are collinear,  $AF$  is the bisector of  $\angle BAZ$ ,  $\angle ABF = \angle FAB$  and  $\angle ACD = \angle DAC \Rightarrow \angle ABF = \angle ACD$ .

Step 11.  $\angle BAF = \angle CAD$  and  $\angle ABF = \angle ACD \Rightarrow \frac{AB}{AC} = \frac{BF}{CD}$ .

Step 12.  $A, C, F$  are collinear,  $\angle BAF = \angle DAE$ ,  $\angle ADE = \angle EAD$  and  $CF$  is parallel to  $DE \Rightarrow \angle BAC = \angle FAD$ .

Step 13.  $AD = CD$ ,  $AF = BF$  and  $\frac{AB}{AC} = \frac{BF}{CD} \Rightarrow \frac{AB}{AC} = \frac{AF}{AD}$ .

Step 14.  $\angle BAC = \angle FAD$  and  $\frac{AB}{AC} = \frac{AF}{AD} \Rightarrow \angle ABC = \angle AFD$  and  $\frac{BA}{BC} = \frac{FA}{FD}$ .

Step 15.  $\angle ABC = \angle AFD$ ,  $\angle ABF = \angle FAB$  and  $AB$  is parallel to  $CD \Rightarrow \angle (BC, DF) = \angle (BF, CD)$ .

Step 16.  $\angle (BC, DF) = \angle (BF, CD)$  and  $BC$  is perpendicular to  $BF \Rightarrow \angle BCD = \angle BFD$  and  $\angle CBF = \angle CDF$ .

Step 17.  $\angle BCD = \angle BFD$  and  $AB$  is parallel to  $CD \Rightarrow \angle ABC = \angle DFB$ .

Step 18.  $AF = BF$  and  $\frac{BA}{BC} = \frac{FA}{FD} \Rightarrow \frac{BA}{BC} = \frac{FB}{FD}$ .

Step 19.  $\angle ABC = \angle DFB$  and  $\frac{BA}{BC} = \frac{FB}{FD} \Rightarrow \angle ABD = \angle (AC, BF)$ ,  $\angle (AC, DF) = \angle CBD$  and  $\angle BAC = \angle DBF$ .

Step 20.  $A, C, F$  are collinear,  $A, D, Z$  are collinear,  $AF$  is the bisector of  $\angle BAZ$ ,  $AD$  is the bisector of  $\angle CAE$ ,  $\angle ABF = \angle FAB$  and  $\angle ADE = \angle EAD \Rightarrow \angle ABF = \angle ADE$ .

Step 21.  $\angle BAF = \angle DAE$  and  $\angle ABF = \angle ADE \Rightarrow \frac{AB}{AD} = \frac{BF}{DE}$ .

Step 22.  $A, C, F$  are collinear,  $A, D, Z$  are collinear,  $\angle CDZ = \angle (CF, MX)$ ,  $AB$  is parallel to  $CD$  and  $AE$  is parallel to  $MX \Rightarrow \angle BAD = \angle FAE$ .

Step 23.  $AE = DE$ ,  $AF = BF$  and  $\frac{AB}{AD} = \frac{BF}{DE} \Rightarrow \frac{AB}{AD} = \frac{AF}{AE}$ .

Step 24.  $\angle BAD = \angle FAE$  and  $\frac{AB}{AD} = \frac{AF}{AE} \Rightarrow \angle ABD = \angle AFE$ .

Step 25.  $C, F, M$  are collinear and  $CM = FM \Rightarrow M$  is the midpoint of  $CF$ .

Step 26.  $M$  is the midpoint of  $CF$  and  $BC$  is perpendicular to  $BF \Rightarrow BM = FM$  and  $BM = CM$ .

Step 27.  $BM = FM \Rightarrow \angle BFM = \angle MBF$ .

Step 28.  $A, C, F$  are collinear,  $A, D, Z$  are collinear,  $\angle BAF = \angle DAE$  and  $AE$  is parallel to  $MX \Rightarrow \angle (AB, CF) = \angle (DZ, MX)$ .

Step 29.  $A, C, F$  are collinear,  $A, D, Z$  are collinear,  $AF$  is the bisector of  $\angle BAZ$  and  $\angle ABF = \angle FAB \Rightarrow \angle ABF = \angle (DZ, CF)$ .

Step 30.  $\angle(AB, CF) = \angle(DZ, MX)$  and  $\angle ABF = \angle(DZ, CF) \Rightarrow \angle BFC = \angle(CF, MX)$ .

Step 31.  $A, C, F$  are collinear,  $C, F, M$  are collinear,  $\angle ABD = \angle(AC, BF)$ ,  $\angle ABD = \angle AFE$  and  $\angle BFM = \angle MBF \Rightarrow \angle AFE = \angle FBM$ .

Step 32.  $A, C, F$  are collinear,  $C, F, M$  are collinear,  $\angle BFC = \angle(CF, MX)$  and  $AE$  is parallel to  $MX \Rightarrow \angle FAE = \angle BFM$ .

Step 33.  $\angle FAE = \angle BFM$  and  $\angle AFE = \angle FBM \Rightarrow \frac{AE}{FM} = \frac{FA}{FB}$ .

Step 34.  $A, C, F$  are collinear,  $\angle ABC = \angle AFD$  and  $AB$  is parallel to  $CD \Rightarrow \angle BCD = \angle DFC$ .

Step 35.  $A, C, F$  are collinear,  $\angle ABF = \angle ACD$  and  $AB$  is parallel to  $CD \Rightarrow \angle(BF, CD) = \angle DCF$ .

Step 36.  $\angle(BF, CD) = \angle DCF$  and  $\angle BCD = \angle DFC \Rightarrow \angle FBC = \angle CDF$ .

Step 37.  $\angle CBF = \angle CDF$  and  $\angle FBC = \angle CDF \Rightarrow CD$  is perpendicular to  $DF$ .

Step 38.  $M$  is the midpoint of  $CF$  and  $CD$  is perpendicular to  $DF \Rightarrow DM = FM$ .

Step 39.  $\angle ABC = \angle AFD$  and  $\angle ABC = \angle DFB \Rightarrow FD$  is the bisector of  $\angle AFB$ .

Step 40.  $AF = BF$  and  $FD$  is the bisector of  $\angle AFB \Rightarrow AD = BD$  and  $\angle DAF = \angle FBD$ .

Step 41.  $AD = BD$  and  $AD = CD \Rightarrow BD = CD$ .

Step 42.  $BD = CD$  and  $BM = CM \Rightarrow BC$  is perpendicular to  $DM$ .

Step 43.  $AE = DE$ ,  $AF = BF$ ,  $DM = FM$  and  $\frac{AE}{FM} = \frac{FA}{FB} \Rightarrow DE = DM$ .

Step 44.  $A, C, F$  are collinear,  $\angle DAF = \angle FBD$ ,  $CF$  is parallel to  $DE$ ,  $BC$  is perpendicular to  $BF$  and  $BC$  is perpendicular to  $DM \Rightarrow \angle ADM = \angle EDB$ .

Step 45.  $AD = BD$ ,  $DE = DM$  and  $\angle ADM = \angle EDB \Rightarrow AM = BE$ .

Step 46.  $AM$  is parallel to  $EX \Rightarrow \angle AME = \angle XEM$ .

Step 47.  $AE$  is parallel to  $MX \Rightarrow \angle AEM = \angle XME$ .

Step 48.  $\angle AEM = \angle XME$  and  $\angle AME = \angle XEM \Rightarrow AM = EX$ .

Step 49.  $A, C, F$  are collinear,  $C, F, M$  are collinear and  $AM$  is parallel to  $EX \Rightarrow EX$  is parallel to  $FM$ .

Step 50.  $E, M, Y$  are collinear,  $F, X, Y$  are collinear and  $EX$  is parallel to  $FM \Rightarrow \frac{EX}{EY} = \frac{MF}{MY}$ .

Step 51.  $A, C, F$  are collinear,  $\angle ABD = \angle AFE$  and  $AB$  is parallel to  $CD \Rightarrow \angle BDC = \angle EFC$ .

Step 52.  $\angle BCD = \angle DFC$  and  $\angle BDC = \angle EFC \Rightarrow \angle CBD = \angle DFE$ .

Step 53.  $A, C, F$  are collinear,  $\angle(AC, DF) = \angle CBD$ ,  $\angle ABC = \angle AFD$ ,  $\angle CBD = \angle DFE$  and  $AB$  is parallel to  $CD \Rightarrow \angle BCD = \angle EFD$ .

Step 54.  $\angle BCD = \angle EFD$  and  $CD$  is perpendicular to  $DF \Rightarrow BC$  is perpendicular to  $EF$ .

Step 55.  $\angle(BF, CD) = \angle DCF$  and  $\angle BDC = \angle EFC \Rightarrow \angle FBD = \angle(CD, EF)$ .

Step 56.  $A, C, F$  are collinear,  $\angle BAC = \angle DBF$ ,  $\angle ABF = \angle FAB$ ,  $\angle FBD = \angle(CD, EF)$  and  $AB$  is parallel to  $CD \Rightarrow \angle(BF, CD) = \angle(EF, CD)$ .

Step 57.  $\angle(BF, CD) = \angle(EF, CD) \Rightarrow BF$  is parallel to  $EF$ .

Step 58.  $BF$  is parallel to  $EF \Rightarrow B, E, F$  are collinear.

Step 59.  $AM = BE$ ,  $AM = EX$ ,  $DM = FM$  and  $\frac{EX}{EY} = \frac{MF}{MY} \Rightarrow \frac{EB}{EY} = \frac{MD}{MY}$ .

Step 60.  $B, E, F$  are collinear,  $E, M, Y$  are collinear,  $BC$  is perpendicular to  $DM$  and  $BC$  is perpendicular to  $EF \Rightarrow \angle BEY = \angle DMY$ .

Step 61.  $\angle BEY = \angle DMY$  and  $\frac{EB}{EY} = \frac{MD}{MY} \Rightarrow \angle BYE = \angle DYM$ .

Step 62.  $E, M, Y$  are collinear and  $\angle BYE = \angle DYM \Rightarrow BY$  is parallel to  $DY$ .

Step 63.  $BY$  is parallel to  $DY \Rightarrow B, D, Y$  are collinear

■

## 2.24 IMO 2017 P4

**Original:**

Let  $R$  and  $S$  be different points on a circle  $\Omega$  such that  $RS$  is not a diameter. Let  $l$  be the tangent line to  $\Omega$  at  $R$ . Point  $T$  is such that  $S$  is the midpoint of  $RT$ . Point  $J$  is chosen on minor arc  $RS$  of  $\Omega$  so that the circumcircle  $\Gamma$  of triangle  $JST$  intersects  $l$  at two distinct points. Let  $A$  be the common point of  $\Gamma$  and  $l$  closer to  $R$ . Line  $AJ$  meets  $\Omega$  again at  $K$ . Prove that line  $KT$  is tangent to  $\Gamma$ .

**Translated:**

Let  $R$  and  $S$  be any two distinct points. Define point  $T$  as the mirror of  $R$  through  $S$ . Define point  $O$  such that  $OR = OS$ . Let  $J$  be any point on circle  $(O, S)$ . Define point  $O_1$  as the circumcenter of triangle  $SJT$ . Define point  $A$  on circle  $(O_1, S)$  such that  $AR$  is perpendicular to  $OR$ . Define point  $K$  as the intersection of circle  $(O, S)$  and line  $AJ$ . Prove that  $KT$  is perpendicular to  $O_1T$

**Proof:**

Step 1.  $JO = OS, KO = OS$  and  $OR = OS \Rightarrow J, K, R, S$  are cyclic.

Step 2.  $J, K, R, S$  are cyclic  $\Rightarrow \angle JKR = \angle JSR$ .

Step 3.  $AO_1 = O_1S, JO_1 = O_1S$  and  $O_1S = O_1T \Rightarrow A, J, S, T$  are cyclic.

Step 4.  $A, J, S, T$  are cyclic  $\Rightarrow \angle JAT = \angle JST$  and  $\angle SAT = \angle SJT$ .

Step 5.  $KO = OS$  and  $OR = OS \Rightarrow O$  is the circumcenter of  $KRS$ .

Step 6.  $O$  is the circumcenter of  $KRS$  and  $AR$  is perpendicular to  $OR \Rightarrow \angle ARS = \angle RKS$ .

Step 7.  $A, J, K$  are collinear,  $R, S, T$  are collinear,  $\angle JAT = \angle JST$  and  $\angle JKR = \angle JSR \Rightarrow \angle ATR = \angle KRS$ .

Step 8.  $R, S, T$  are collinear and  $\angle ARS = \angle RKS \Rightarrow \angle ART = \angle RKS$ .

Step 9.  $\angle ART = \angle RKS$  and  $\angle ATR = \angle KRS \Rightarrow \frac{AT}{RS} = \frac{RT}{RK}$ .

Step 10.  $RS = ST$  and  $\frac{AT}{RS} = \frac{RT}{RK} \Rightarrow \frac{TA}{TS} = \frac{RT}{RK}$ .

Step 11.  $A, J, K$  are collinear,  $R, S, T$  are collinear,  $\angle JAT = \angle JST$  and  $\angle JKR = \angle JSR \Rightarrow \angle ATS = \angle KRT$ .

Step 12.  $\angle ATS = \angle KRT$  and  $\frac{TA}{TS} = \frac{RT}{RK} \Rightarrow \angle TAS = \angle KTR$ .

Step 13.  $R, S, T$  are collinear,  $\angle SAT = \angle SJT$  and  $\angle TAS = \angle KTR \Rightarrow \angle TJS = \angle KTS$ .

Step 14.  $JO_1 = O_1S$  and  $O_1S = O_1T \Rightarrow O_1$  is the circumcenter of  $JST$ .

Step 15.  $O_1$  is the circumcenter of  $JST$  and  $\angle TJS = \angle KTS \Rightarrow KT$  is perpendicular to  $O_1T$

■

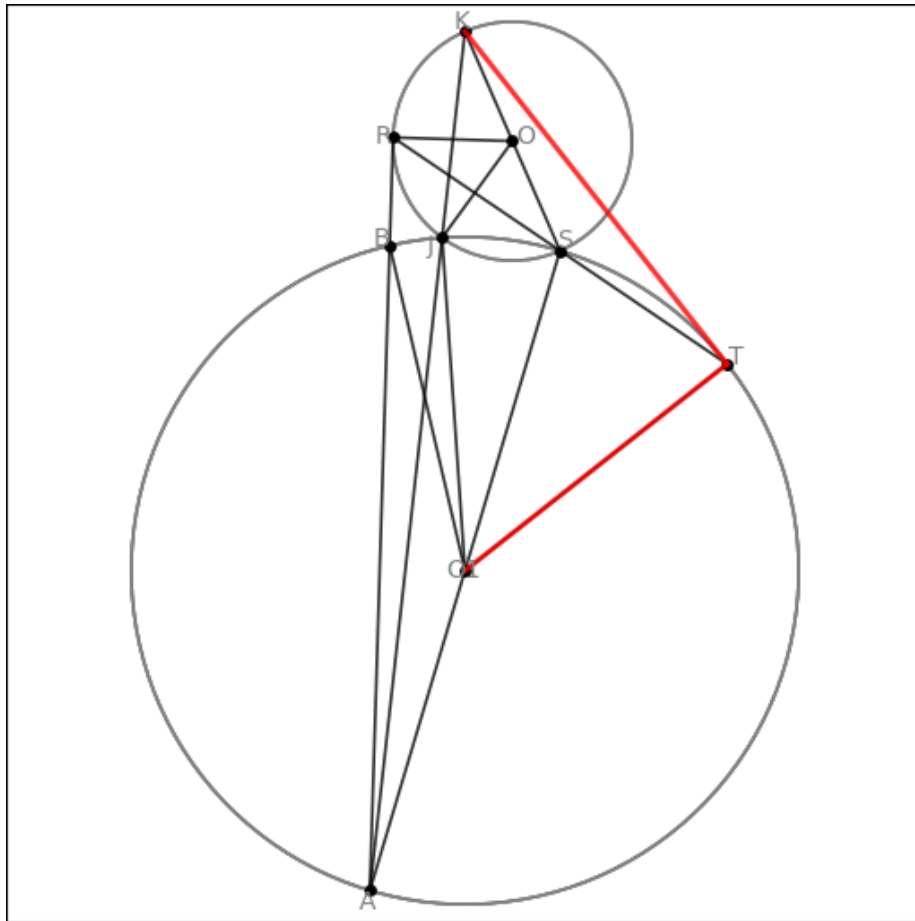

Figure 24: imo 2017 p4

## 2.25 IMO 2018 P1

### Original:

Let  $\Gamma$  be the circumcircle of triangle  $ABC$ . Points  $D$  and  $E$  lie on segments  $AB$  and  $AC$ , respectively, such that  $AD = AE$ . The perpendicular bisectors of  $BD$  and  $CE$  intersect the minor arcs  $AB$  and  $AC$  of  $\Gamma$  at points  $F$  and  $G$ , respectively. Prove that the lines  $DE$  and  $FG$  are parallel.

### Translated:

Let  $ABC$  be a triangle. Define point  $O$  as the circumcenter of triangle  $CBA$ . Let  $D$  be any point on line  $AB$ . Define point  $E$  as the intersection of circle  $(A, D)$  and line  $AC$ . Define point  $F$  on circle  $(O, A)$  such that  $\angle BDF = \angle FBD$ . Define point  $G$  on circle  $(O, A)$  such that  $\angle CEG = \angle GCE$ . Prove that  $DE$  is parallel to  $FG$ .

### Proof:

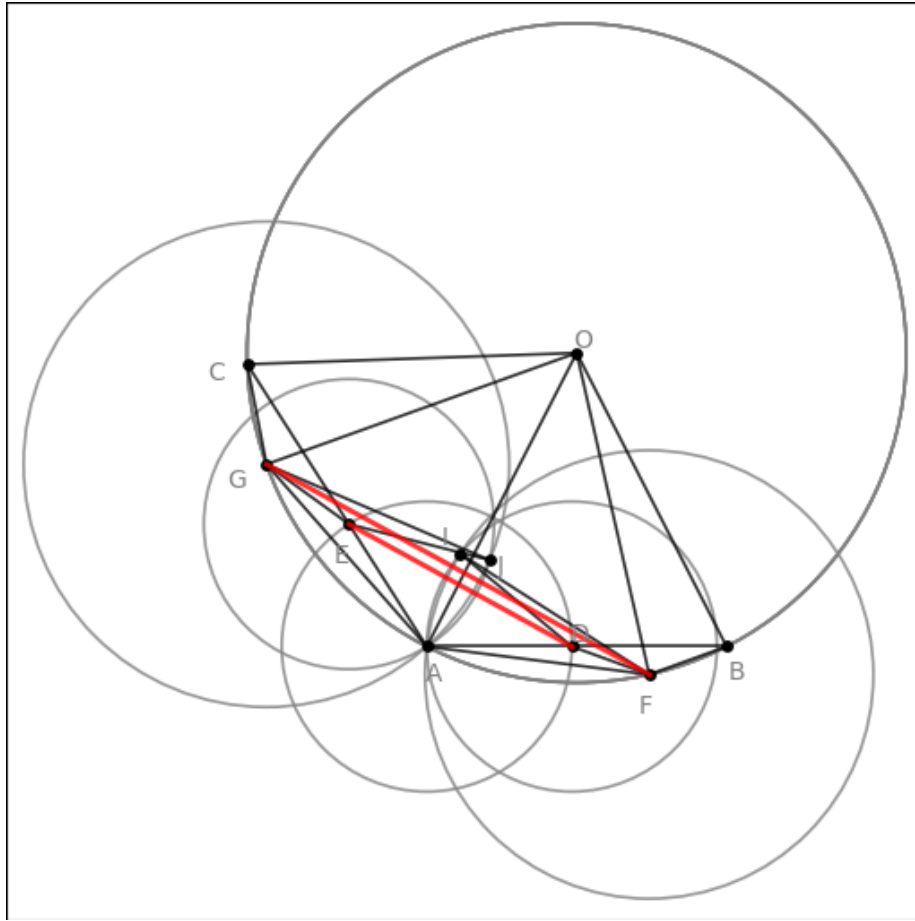

Figure 25: imo 2018 p1

- Construct point  $I$  as the intersection of circles  $(D, A)$  and  $(F, A)$ .  
 Construct point  $J$  as the intersection of circles  $(E, A)$  and  $(G, A)$ .
- Step 1.  $AO = BO$ ,  $AO = OF$  and  $AO = OG \Rightarrow A, B, F, G$  are cyclic.  
 Step 2.  $AO = BO$ ,  $AO = OF$  and  $BO = CO \Rightarrow A, B, C, F$  are cyclic.  
 Step 3.  $A, B, C, F$  are cyclic and  $A, B, F, G$  are cyclic  $\Rightarrow B, C, F, G$  are cyclic.  
 Step 4.  $B, C, F, G$  are cyclic  $\Rightarrow \angle BCF = \angle BGF$  and  $\angle BFC = \angle BGC$ .  
 Step 5.  $A, B, F, G$  are cyclic  $\Rightarrow \angle AFB = \angle AGB$ .  
 Step 6.  $A, B, C, F$  are cyclic  $\Rightarrow \angle BAF = \angle BCF$  and  $\angle BAC = \angle BFC$ .  
 Step 7.  $AO = OF$  and  $AO = OG \Rightarrow OF = OG$ .  
 Step 8.  $OF = OG \Rightarrow \angle OFG = \angle FGO$ .  
 Step 9.  $AD = DI$  and  $AF = FI \Rightarrow AI$  is perpendicular to  $DF$ .  
 Step 10.  $AO = OF \Rightarrow \angle OAF = \angle AFO$ .  
 Step 11.  $AO = OG \Rightarrow \angle OAG = \angle AGO$ .

Step 12.  $A, B, D$  are collinear and  $\angle BDF = \angle FBD \Rightarrow \angle(AB, DF) = \angle FBA$ .

Step 13.  $\angle BAF = \angle BCF$ ,  $\angle(AB, DF) = \angle FBA$ ,  $\angle OAF = \angle AFO$ ,  $\angle OAG = \angle AGO$ ,  $\angle BCF = \angle BGF$ ,  $\angle AFB = \angle AGB$ ,  $\angle OFG = \angle FGO$  and  $AI$  is perpendicular to  $DF \Rightarrow$  by angle chasing:  $\angle AFO = \angle IAB$ .

Step 14.  $AD = DI \Rightarrow \angle DAI = \angle AID$ .

Step 15.  $A, B, D$  are collinear and  $\angle DAI = \angle AID \Rightarrow \angle BAI = \angle AID$ .

Step 16.  $\angle BAF = \angle BCF$ ,  $\angle BAI = \angle AID$ ,  $\angle(AB, DF) = \angle FBA$ ,  $\angle OAF = \angle AFO$ ,  $\angle OAG = \angle AGO$ ,  $\angle BCF = \angle BGF$ ,  $\angle AFB = \angle AGB$ ,  $\angle OFG = \angle FGO$  and  $AI$  is perpendicular to  $DF \Rightarrow$  by angle chasing:  $\angle FAO = \angle AID$ .

Step 17.  $A, B, D$  are collinear and  $\angle AFO = \angle IAB \Rightarrow \angle AFO = \angle IAD$ .

Step 18.  $\angle FAO = \angle AID$  and  $\angle AFO = \angle IAD \Rightarrow \frac{AD}{OF} = \frac{AI}{AF}$ .

Step 19.  $AO = BO$ ,  $AD = AE$  and  $AE = EJ \Rightarrow$  by ratio chasing:  $\frac{OA}{OB} = \frac{AD}{EJ}$ .

Step 20.  $AE = EJ$  and  $AG = GJ \Rightarrow AJ$  is perpendicular to  $EG$ .

Step 21.  $A, C, E$  are collinear and  $\angle CEG = \angle GCE \Rightarrow \angle(AC, EG) = \angle GCA$ .

Step 22.  $\angle BAC = \angle BFC$ ,  $\angle BAF = \angle BCF$ ,  $\angle(AC, EG) = \angle GCA$ ,  $\angle OAF = \angle AFO$ ,  $\angle OAG = \angle AGO$ ,  $\angle BCF = \angle BGF$ ,  $\angle BFC = \angle BGC$ ,  $\angle OFG = \angle FGO$  and  $AJ$  is perpendicular to  $EG \Rightarrow$  by angle chasing:  $\angle AGO = \angle JAC$ .

Step 23.  $AE = EJ \Rightarrow \angle EAJ = \angle AJE$ .

Step 24.  $A, C, E$  are collinear and  $\angle EAJ = \angle AJE \Rightarrow \angle CAJ = \angle AJE$ .

Step 25.  $\angle BAC = \angle BFC$ ,  $\angle BAF = \angle BCF$ ,  $\angle CAJ = \angle AJE$ ,  $\angle(AC, EG) = \angle GCA$ ,  $\angle OAF = \angle AFO$ ,  $\angle OAG = \angle AGO$ ,  $\angle BCF = \angle BGF$ ,  $\angle BFC = \angle BGC$ ,  $\angle OFG = \angle FGO$  and  $AJ$  is perpendicular to  $EG \Rightarrow$  by angle chasing:  $\angle GAO = \angle AJE$ .

Step 26.  $A, C, E$  are collinear and  $\angle AGO = \angle JAC \Rightarrow \angle AGO = \angle JAE$ .

Step 27.  $\angle GAO = \angle AJE$  and  $\angle AGO = \angle JAE \Rightarrow \frac{AE}{OG} = \frac{AJ}{AG}$ .

Step 28.  $AO = BO$ ,  $AE = EJ$ ,  $OF = OG$ ,  $\frac{AD}{OF} = \frac{AI}{AF}$ ,  $\frac{AE}{OG} = \frac{AJ}{AG}$  and  $\frac{OA}{OB} = \frac{AD}{EJ} \Rightarrow \frac{AF}{AI} = \frac{AG}{AJ}$ .

Step 29.  $AF = FI$ ,  $AG = GJ$  and  $\frac{AF}{AI} = \frac{AG}{AJ} \Rightarrow \frac{IA}{IF} = \frac{JA}{JG}$ .

Step 30.  $\frac{AF}{AI} = \frac{AG}{AJ}$  and  $\frac{IA}{IF} = \frac{JA}{JG} \Rightarrow \angle AGJ = \angle IFA$ .

Step 31.  $AD = AE \Rightarrow \angle ADE = \angle DEA$ .

Step 32.  $AF = FI \Rightarrow \angle FAI = \angle AIF$ .

Step 33.  $AG = GJ \Rightarrow \angle GAJ = \angle AJG$ .

Step 34.  $A, B, D$  are collinear,  $A, C, E$  are collinear and  $\angle ADE = \angle DEA \Rightarrow \angle(AB, DE) = \angle(DE, AC)$ .

Step 35.  $\angle BAC = \angle BFC$ ,  $\angle BAF = \angle BCF$ ,  $\angle(AB, DE) = \angle(DE, AC)$ ,  $\angle(AB, DF) = \angle FBA$ ,  $\angle(AC, EG) = \angle GCA$ ,  $\angle FAI = \angle AIF$ ,  $\angle GAJ = \angle AJG$ ,  $\angle BCF = \angle BGF$ ,  $\angle AFB = \angle AGB$ ,  $\angle BFC = \angle BGC$ ,  $\angle AGJ = \angle IFA$ ,  $AI$  is perpendicular to  $DF$  and  $AJ$  is perpendicular to  $EG \Rightarrow$  by angle chasing:  $DE$  is parallel to  $FG$

■



## 2.26 IMO 2019 P2

### Original:

In triangle  $ABC$ , point  $A_1$  lies on side  $BC$  and point  $B_1$  lies on side  $AC$ . Let  $P$  and  $Q$  be points on segments  $AA_1$  and  $BB_1$ , respectively, such that  $PQ$  is parallel to  $AB$ . Let  $P_1$  be a point on ray  $PB_1$  beyond  $B_1$  such that  $\angle PP_1C = \angle BAC$ . Similarly, let  $Q_1$  be a point on ray  $QA_1$  beyond  $A_1$  such that  $\angle CQ_1Q = \angle CBA$ . Prove that points  $P, Q, P_1$ , and  $Q_1$  are concyclic.

### Translated:

Let  $ABC$  be a triangle. Let  $A_1$  be any point on line  $BC$ . Let  $B_1$  be any point on line  $AC$ . Let  $P$  be any point on line  $AA_1$ . Define point  $Q$  on line  $BB_1$  such that  $AB$  is parallel to  $PQ$ . Define point  $P_1$  on line  $B_1P$  such that  $\angle BAC = \angle PP_1C$ . Define point  $Q_1$  on line  $A_1Q$  such that  $\angle ABC = \angle QQ_1C$ . Prove that  $P, P_1, Q, Q_1$  are cyclic.

### Proof:

Construct point  $O$  as the circumcenter of triangle  $CBA$ .

Construct point  $A_2$  as the intersection of circle  $(O, A)$  and line  $AA_1$ .

Construct point  $B_2$  as the intersection of circle  $(O, B)$  and line  $BB_1$ .

Step 1.  $AO = A_2O, AO = BO$  and  $BO = CO \Rightarrow A, A_2, B, C$  are cyclic.

Step 2.  $A, A_2, B, C$  are cyclic  $\Rightarrow \angle AA_2C = \angle ABC$ .

Step 3.  $A, A_1, A_2$  are collinear,  $A_1, Q, Q_1$  are collinear,  $\angle AA_2C = \angle ABC$  and  $\angle ABC = \angle QQ_1C \Rightarrow \angle A_1A_2C = \angle A_1Q_1C$ .

Step 4.  $\angle A_1A_2C = \angle A_1Q_1C \Rightarrow A_1, A_2, C, Q_1$  are cyclic.

Step 5.  $A_1, A_2, C, Q_1$  are cyclic  $\Rightarrow \angle A_1A_2Q_1 = \angle A_1CQ_1$ .

Step 6.  $A, A_1, A_2$  are collinear,  $A, A_1, P$  are collinear,  $A_1, B, C$  are collinear,  $\angle A_1A_2Q_1 = \angle A_1CQ_1, \angle ABC = \angle QQ_1C$  and  $AB$  is parallel to  $PQ \Rightarrow \angle PA_2Q_1 = \angle PQQ_1$ .

Step 7.  $\angle PA_2Q_1 = \angle PQQ_1 \Rightarrow A_2, P, Q, Q_1$  are cyclic.

Step 8.  $AO = BO, BO = B_2O$  and  $BO = CO \Rightarrow A, B, B_2, C$  are cyclic.

Step 9.  $A, A_2, B, C$  are cyclic and  $A, B, B_2, C$  are cyclic  $\Rightarrow A, A_2, B, B_2$  are cyclic.

Step 10.  $A, A_2, B, B_2$  are cyclic  $\Rightarrow \angle AA_2B_2 = \angle ABB_2$ .

Step 11.  $A, A_1, A_2$  are collinear,  $A, A_1, P$  are collinear,  $B, B_1, B_2$  are collinear,  $B, B_1, Q$  are collinear,  $\angle AA_2B_2 = \angle ABB_2$  and  $AB$  is parallel to  $PQ \Rightarrow \angle B_2A_2P = \angle B_2QP$ .

Step 12.  $\angle B_2A_2P = \angle B_2QP \Rightarrow A_2, B_2, P, Q$  are cyclic.

Step 13.  $A, B, B_2, C$  are cyclic  $\Rightarrow \angle ABB_2 = \angle ACB_2$ .

Step 14.  $B, B_1, B_2$  are collinear,  $B_1, P, P_1$  are collinear,  $\angle BAC = \angle PP_1C$  and  $\angle ABB_2 = \angle ACB_2 \Rightarrow \angle B_1B_2C = \angle B_1P_1C$ .

Step 15.  $\angle B_1B_2C = \angle B_1P_1C \Rightarrow B_1, B_2, C, P_1$  are cyclic.

Step 16.  $B_1, B_2, C, P_1$  are cyclic  $\Rightarrow \angle B_1B_2P_1 = \angle B_1CP_1$ .

Step 17.  $A, B_1, C$  are collinear,  $B, B_1, B_2$  are collinear,  $B, B_1, Q$  are collinear,  $\angle BAC = \angle PP_1C, \angle B_1B_2P_1 = \angle B_1CP_1$  and  $AB$  is parallel to  $PQ \Rightarrow \angle P_1B_2Q = \angle P_1PQ$ .

Step 18.  $\angle P_1B_2Q = \angle P_1PQ \Rightarrow B_2, P, P_1, Q$  are cyclic.

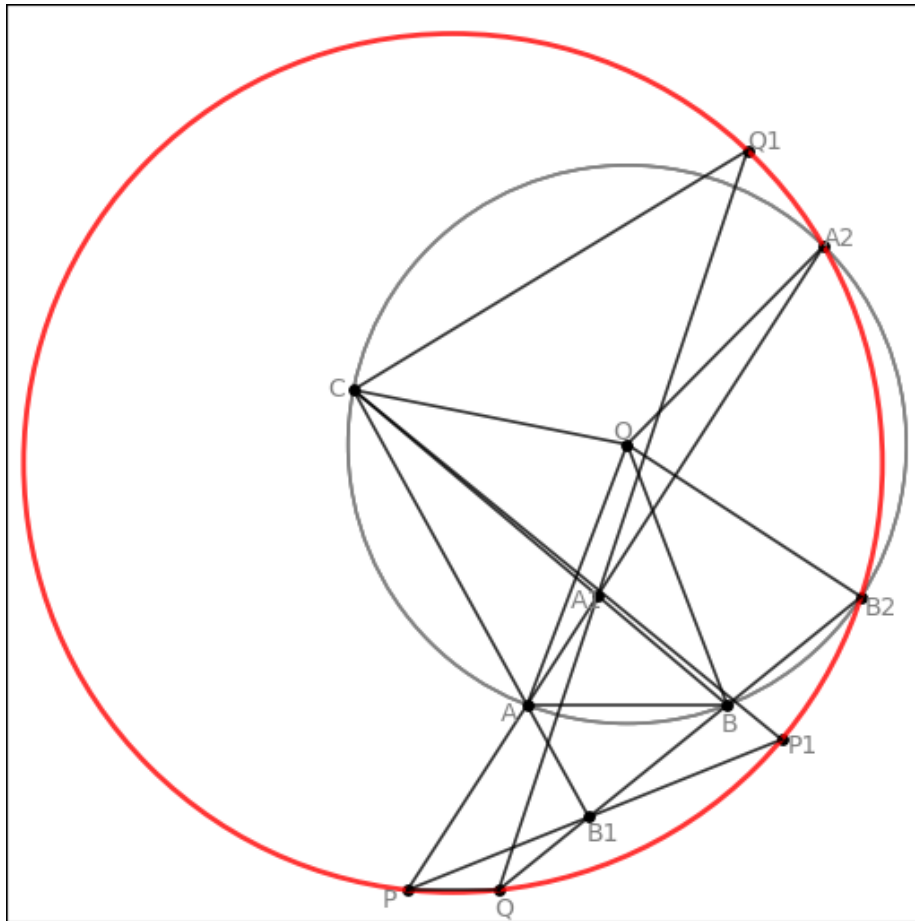

Figure 26: imo 2019 p2

Step 19.  $A_2, B_2, P, Q$  are cyclic,  $A_2, P, Q, Q_1$  are cyclic and  $B_2, P, P_1, Q$  are cyclic  $\Rightarrow P, P_1, Q, Q_1$  are cyclic

■

## 2.27 IMO 2019 P6

**Original:**

Let  $I$  be the incentre of triangle  $ABC$  with  $AB \neq AC$ . The incircle  $W$  of  $ABC$  is tangent to sides  $BC$ ,  $CA$ , and  $AB$  at  $D$ ,  $E$ , and  $F$ , respectively. The line through  $D$  perpendicular to  $EF$  meets  $W$  again at  $R$ . Line  $AR$  meets  $W$  again at  $P$ . The circumcircles of triangles  $PCE$  and  $PBF$  meet again at  $Q$ . Prove that lines  $DI$  and  $PQ$  meet on the line through  $A$  perpendicular to  $AI$ .

**Translated:**

Let  $ABC$  be a triangle. Define point  $I$  such that  $AI$  is the bisector of  $\angle BAC$  and  $CI$  is the bisector of  $\angle ACB$ . Define point  $D$  as the foot of  $I$  on line  $BC$ . Define point  $E$  as the foot of  $I$  on line  $AC$ . Define point  $F$  as the foot of  $I$  on line  $AB$ . Define point  $R$  on circle  $(I, D)$  such that  $DR$  is perpendicular to  $EF$ . Define point  $P$  as the intersection of circle  $(I, D)$  and line  $AR$ . Define point  $O_1$  as the circumcenter of triangle  $ECP$ . Define point  $O_2$  as the circumcenter of triangle  $FBP$ . Define point  $Q$  as the intersection of circles  $(O_1, P)$  and  $(O_2, P)$ . Define point  $T$  as the intersection of lines  $DI$  and  $PQ$ . Prove that  $AI$  is perpendicular to  $AT$ .

**Proof:**

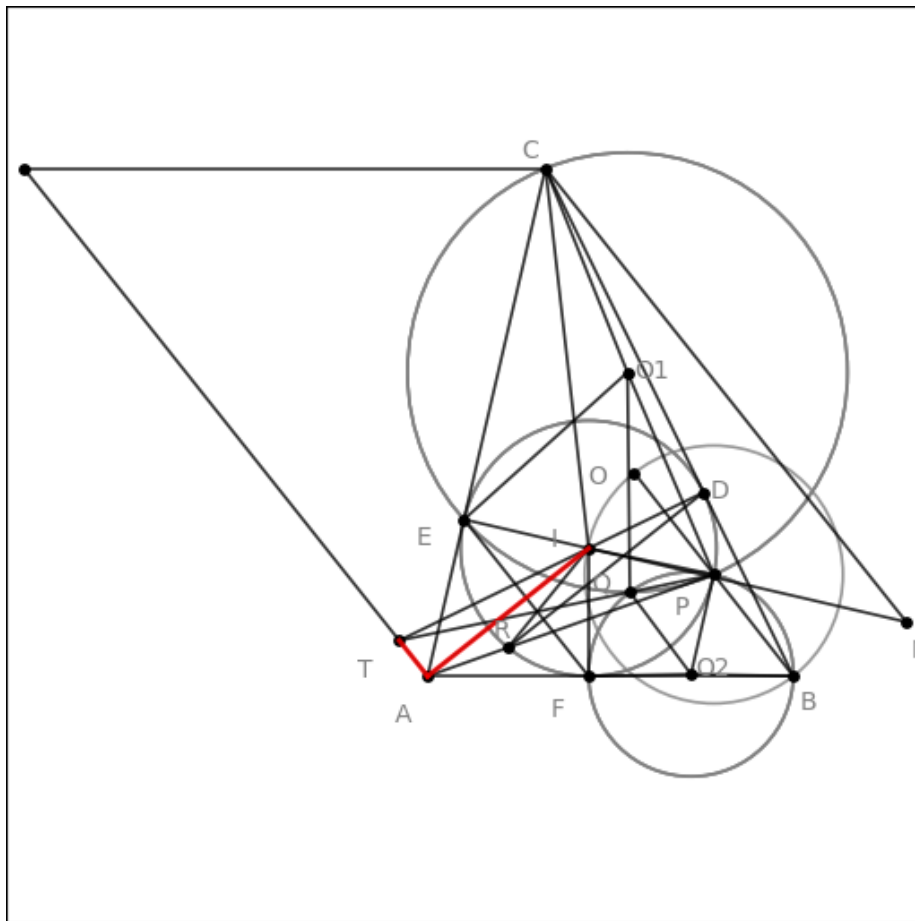

Figure 27: imo 2019 p6

Construct point  $N$  as the orthocenter of triangle  $CAI$ .  
 Construct point  $G$  such that  $AB$  is parallel to  $CG$  and  $AG$  is parallel to  $CN$ .  
 $CN$ .

Step 1.  $A, C, E$  are collinear,  $B, C, D$  are collinear,  $AC$  is perpendicular to  $EI$  and  $BC$  is perpendicular to  $DI \Rightarrow \angle CDI = \angle IEC$ .

Step 2.  $A, C, E$  are collinear,  $B, C, D$  are collinear and  $CI$  is the bisector of  $\angle ACB \Rightarrow CI$  is the bisector of  $\angle DCE$ .

Step 3.  $CI$  is the bisector of  $\angle DCE$  and  $\angle CDI = \angle IEC \Rightarrow DI = EI$  and  $CD = CE$ .

Step 4.  $DI = EI$  and  $DI = IR \Rightarrow I$  is the circumcenter of  $DER$ .

Step 5.  $B, C, D$  are collinear and  $BC$  is perpendicular to  $DI \Rightarrow CD$  is perpendicular to  $DI$ .

Step 6.  $I$  is the circumcenter of  $DER$  and  $CD$  is perpendicular to  $DI \Rightarrow \angle CDR = \angle DER$ .

Step 7.  $D, I, T$  are collinear and  $BC$  is perpendicular to  $DI \Rightarrow BC$  is perpendicular to  $IT$ .

Step 8.  $BC$  is perpendicular to  $IT$  and  $DR$  is perpendicular to  $EF \Rightarrow \angle(BC, EF) = \angle(IT, DR)$  and  $\angle(BC, DR) = \angle(IT, EF)$ .

Step 9.  $DI = IR \Rightarrow \angle IDR = \angle DRI$ .

Step 10.  $\angle(BC, EF) = \angle(IT, DR) \Rightarrow \angle(BC, IT) = \angle(EF, DR)$ .

Step 11.  $D, I, T$  are collinear and  $\angle IDR = \angle DRI \Rightarrow \angle(DR, IT) = \angle IRD$ .

Step 12.  $\angle(BC, IT) = \angle(EF, DR)$  and  $\angle(DR, IT) = \angle IRD \Rightarrow \angle(BC, DR) = \angle(EF, IR)$ .

Step 13.  $A, B, F$  are collinear,  $A, C, E$  are collinear,  $AB$  is perpendicular to  $FI$  and  $AC$  is perpendicular to  $EI \Rightarrow \angle AEI = \angle IFA$ .

Step 14.  $A, B, F$  are collinear,  $A, C, E$  are collinear and  $AI$  is the bisector of  $\angle BAC \Rightarrow AI$  is the bisector of  $\angle EAF$ .

Step 15.  $AI$  is the bisector of  $\angle EAF$  and  $\angle AEI = \angle IFA \Rightarrow EI = FI$ ,  $AE = AF$  and  $\frac{EA}{EI} = \frac{FA}{FI}$ .

Step 16.  $AE = AF$  and  $EI = FI \Rightarrow AI$  is perpendicular to  $EF$ .

Step 17.  $DI = EI$  and  $EI = FI \Rightarrow I$  is the circumcenter of  $DEF$ .

Step 18.  $A, B, F$  are collinear and  $AB$  is perpendicular to  $FI \Rightarrow AF$  is perpendicular to  $FI$ .

Step 19.  $I$  is the circumcenter of  $DEF$  and  $AF$  is perpendicular to  $FI \Rightarrow \angle AFD = \angle FED$ .

Step 20.  $B, C, D$  are collinear,  $\angle(BC, DR) = \angle(EF, IR)$ ,  $\angle CDR = \angle DER$ ,  $AI$  is perpendicular to  $CN$  and  $AI$  is perpendicular to  $EF \Rightarrow \angle(CN, IR) = \angle DER$ .

Step 21.  $\angle AFD = \angle FED$ ,  $AI$  is perpendicular to  $CN$  and  $AI$  is perpendicular to  $EF \Rightarrow \angle(AF, CN) = \angle FDE$ .

Step 22.  $\angle(AF, CN) = \angle FDE$  and  $\angle(CN, IR) = \angle DER \Rightarrow \angle(AF, IR) = \angle(DF, ER)$ .

Step 23.  $DI = EI$ ,  $DI = IR$  and  $EI = FI \Rightarrow I$  is the circumcenter of  $EFR$ .

Step 24.  $I$  is the circumcenter of  $EFR$  and  $AF$  is perpendicular to  $FI \Rightarrow \angle AFR = \angle FER$ .

Step 25.  $A, B, F$  are collinear,  $A, C, E$  are collinear,  $AB$  is perpendicular to  $FI$  and  $AC$  is perpendicular to  $EI \Rightarrow \angle AEI = \angle AFI$ .

Step 26.  $\angle AEI = \angle AFI \Rightarrow A, E, F, I$  are cyclic.

Step 27.  $A, E, F, I$  are cyclic  $\Rightarrow \angle AFE = \angle AIE$  and  $\angle AEF = \angle AIF$ .

Step 28.  $DI = EI$ ,  $DI = IR$  and  $EI = FI \Rightarrow I$  is the circumcenter of  $DFR$ .

Step 29.  $I$  is the circumcenter of  $DFR$  and  $CD$  is perpendicular to  $DI \Rightarrow \angle CDF = \angle DRF$ .

Step 30.  $\angle AFE = \angle AIE$ ,  $\angle AFR = \angle FER$ ,  $AC$  is perpendicular to  $EI$  and  $AC$  is perpendicular to  $IN \Rightarrow \angle(AI, EN) = \angle FRE$ .

Step 31.  $B, C, D$  are collinear,  $\angle CDF = \angle DRF$ ,  $AI$  is perpendicular to  $EF$  and  $DR$  is perpendicular to  $EF \Rightarrow \angle(AI, BC) = \angle RFD$ .

Step 32.  $\angle(AI, BC) = \angle RFD$  and  $\angle(AI, EN) = \angle FRE \Rightarrow \angle(BC, EN) = \angle(DF, ER)$ .

Step 33.  $A, B, F$  are collinear and  $\angle(AF, IR) = \angle(DF, ER) \Rightarrow \angle BFD = \angle IRE$ .

Step 34.  $B, C, D$  are collinear,  $\angle(BC, EN) = \angle(DF, ER)$ ,  $AC$  is perpendicular to  $EI$  and  $AC$  is perpendicular to  $IN \Rightarrow \angle BDF = \angle IER$ .

Step 35.  $\angle BDF = \angle IER$  and  $\angle BFD = \angle IRE \Rightarrow \frac{FB}{FD} = \frac{RI}{RE}$ .

Step 36.  $A, C, E$  are collinear and  $AC$  is perpendicular to  $EI \Rightarrow AE$  is perpendicular to  $EI$ .

Step 37.  $I$  is the circumcenter of  $DEF$  and  $AE$  is perpendicular to  $EI \Rightarrow \angle AEF = \angle EDF$ .

Step 38.  $B, C, D$  are collinear,  $\angle(BC, DR) = \angle(EF, IR)$ ,  $\angle CDF = \angle DRF$ ,  $AI$  is perpendicular to  $CN$  and  $AI$  is perpendicular to  $EF \Rightarrow \angle(CN, IR) = \angle DFR$ .

Step 39.  $A, C, E$  are collinear,  $\angle AEF = \angle EDF$ ,  $AI$  is perpendicular to  $CN$  and  $AI$  is perpendicular to  $EF \Rightarrow \angle ACN = \angle EDF$ .

Step 40.  $\angle ACN = \angle EDF$  and  $\angle(CN, IR) = \angle DFR \Rightarrow \angle(AC, DE) = \angle IRF$ .

Step 41.  $I$  is the circumcenter of  $EFR$  and  $AE$  is perpendicular to  $EI \Rightarrow \angle AEF = \angle ERF$ .

Step 42.  $\angle AEF = \angle AIF$  and  $\angle AEF = \angle ERF \Rightarrow \angle AIF = \angle ERF$ .

Step 43.  $B, C, D$  are collinear,  $\angle CDR = \angle DER$ ,  $AI$  is perpendicular to  $EF$  and  $DR$  is perpendicular to  $EF \Rightarrow \angle(AI, BC) = \angle RED$ .

Step 44.  $\angle(AI, BC) = \angle RED$  and  $\angle AIF = \angle ERF \Rightarrow \angle(BC, DE) = \angle IFR$ .

Step 45.  $A, C, E$  are collinear and  $\angle(AC, DE) = \angle IRF \Rightarrow \angle CED = \angle IRF$ .

Step 46.  $B, C, D$  are collinear and  $\angle(BC, DE) = \angle IFR \Rightarrow \angle CDE = \angle IFR$ .

Step 47.  $\angle CDE = \angle IFR$  and  $\angle CED = \angle IRF \Rightarrow \frac{DC}{DE} = \frac{FI}{FR}$ .

Step 48.  $CD = CE$  and  $DI = EI \Rightarrow CI$  is perpendicular to  $DE$ .

Step 49.  $AC$  is perpendicular to  $EI$ ,  $AC$  is perpendicular to  $IN$  and  $CI$  is perpendicular to  $DE \Rightarrow \angle(AC, EN) = \angle(DE, CI)$ .

Step 50.  $\angle(AC, EN) = \angle(DE, CI)$  and  $\angle ACN = \angle EDF \Rightarrow \angle CNE = \angle(DF, CI)$ .

Step 51.  $AC$  is perpendicular to  $EI$  and  $AC$  is perpendicular to  $IN \Rightarrow AC$  is perpendicular to  $EN$ .

Step 52.  $AC$  is perpendicular to  $EN$  and  $AI$  is perpendicular to  $CN \Rightarrow \angle ACN = \angle(EN, AI)$ .

Step 53.  $A, C, E$  are collinear,  $\angle ACN = \angle(EN, AI)$ ,  $AC$  is perpendicular to  $EI$  and  $AC$  is perpendicular to  $IN \Rightarrow \angle AIE = \angle NCE$ .

Step 54.  $A, C, E$  are collinear,  $AC$  is perpendicular to  $EI$  and  $AC$  is perpendicular to  $IN \Rightarrow \angle AEI = \angle NEC$ .

Step 55.  $\angle AEI = \angle NEC$  and  $\angle AIE = \angle NCE \Rightarrow \frac{EA}{EN} = \frac{EI}{EC}$ ,  $\frac{EA}{EI} = \frac{EN}{EC}$  and  $\frac{AI}{AE} = \frac{NC}{NE}$ .

Step 56.  $A, C, E$  are collinear,  $AC$  is perpendicular to  $EI$  and  $AC$  is perpendicular to  $IN \Rightarrow \angle AEN = \angle IEC$ .

Step 57.  $\angle AEN = \angle IEC$  and  $\frac{EA}{EN} = \frac{EI}{EC} \Rightarrow \angle NAE = \angle CIE$  and  $\angle ANE = \angle ICE$ .

Step 58.  $A, C, E$  are collinear,  $\angle NAE = \angle CIE$ ,  $\angle CNE = \angle(DF, CI)$ ,  $AC$  is perpendicular to  $EI$ ,  $AC$  is perpendicular to  $IN$ ,  $AI$  is perpendicular to  $CN$  and  $AI$  is perpendicular to  $EF \Rightarrow \angle CAN = \angle EFD$ .

Step 59.  $\angle ACN = \angle EDF$  and  $\angle CAN = \angle EFD \Rightarrow \frac{CA}{CN} = \frac{DF}{DE}$ .

Step 60.  $AC$  is perpendicular to  $EI$ ,  $AC$  is perpendicular to  $IN$  and  $AI$  is perpendicular to  $CN \Rightarrow \angle(AC, EN) = \angle(AI, CN)$ .

Step 61.  $A, B, F$  are collinear and  $AI$  is the bisector of  $\angle BAC \Rightarrow AI$  is the bisector of  $\angle CAF$ .

Step 62.  $AI$  is the bisector of  $\angle CAF$  and  $\angle(AC, EN) = \angle(AI, CN) \Rightarrow \angle(AF, CN) = \angle(AI, EN)$ .

Step 63.  $A, B, F$  are collinear,  $\angle(AF, CN) = \angle(AI, EN)$ ,  $\angle ACN = \angle(EN, AI)$ ,  $AB$  is parallel to  $CG$  and  $AG$  is parallel to  $CN \Rightarrow \angle CAG = \angle AGC$ .

Step 64.  $\angle CAG = \angle AGC \Rightarrow AC = CG$ .

Step 65.  $DI = EI$ ,  $DI = IP$  and  $EI = FI \Rightarrow FI = IP$ .

Step 66.  $BO_2 = FO_2$  and  $BO_2 = PO_2 \Rightarrow FO_2 = PO_2$ .

Step 67.  $FI = IP$  and  $FO_2 = PO_2 \Rightarrow \angle IFO_2 = \angle O_2PI$ .

Step 68.  $FI = IP$  and  $FO_2 = PO_2 \Rightarrow FP$  is perpendicular to  $IO_2$ .

Step 69.  $BO_2 = FO_2$ ,  $BO_2 = PO_2$  and  $PO_2 = O_2Q \Rightarrow B, F, P, Q$  are cyclic.

Step 70.  $B, F, P, Q$  are cyclic  $\Rightarrow \angle FBQ = \angle FPQ$  and  $\angle BFQ = \angle BPQ$ .

Step 71.  $BO_2 = FO_2$ ,  $BO_2 = PO_2$  and  $PO_2 = O_2Q \Rightarrow FO_2 = O_2Q$ .

Step 72.  $FO_2 = O_2Q \Rightarrow \angle O_2FQ = \angle FQO_2$ .

Step 73.  $BO_2 = PO_2$  and  $PO_2 = O_2Q \Rightarrow BO_2 = O_2Q$ .

Step 74.  $BO_2 = O_2Q \Rightarrow \angle O_2BQ = \angle BQO_2$ .

Step 75.  $FO_2 = PO_2 \Rightarrow \angle FPO_2 = \angle O_2FP$ .

Step 76.  $PO_2 = O_2Q \Rightarrow \angle O_2PQ = \angle PQO_2$ .

Step 77.  $A, B, F$  are collinear and  $\angle FBQ = \angle FPQ \Rightarrow \angle ABQ = \angle FPQ$ .

Step 78.  $A, B, F$  are collinear and  $\angle BFQ = \angle BPQ \Rightarrow \angle(AB, FQ) = \angle BPQ$ .

Step 79.  $\angle(AB, FQ) = \angle BPQ$ ,  $\angle ABQ = \angle FPQ$ ,  $\angle O_2BQ = \angle BQO_2$ ,  $\angle O_2FQ = \angle FQO_2$ ,  $\angle FPO_2 = \angle O_2FP$ ,  $\angle O_2PQ = \angle PQO_2$  and  $AB$  is perpendicular to  $FI \Rightarrow$  by angle chasing:  $\angle BPF = \angle(BO_2, FI)$  and  $\angle O_2BP = \angle IFP$ .

Step 80.  $\angle ABQ = \angle FPQ$ ,  $\angle O_2BQ = \angle BQO_2$ ,  $\angle FPO_2 = \angle O_2FP$ ,  $\angle O_2PQ = \angle PQO_2$  and  $AB$  is perpendicular to  $FI \Rightarrow$  by angle chasing:  $\angle(BO_2, FI) = \angle IFO_2$ .

Step 81.  $FI = IP \Rightarrow \angle IFP = \angle FPI$ .

Step 82.  $A, B, F$  are collinear,  $AB$  is perpendicular to  $FI$  and  $FP$  is perpendicular to  $IO_2 \Rightarrow \angle AFI = \angle (IO_2, FP)$ .

Step 83.  $\angle AFI = \angle (IO_2, FP)$  and  $\angle IFP = \angle FPI \Rightarrow \angle AFP = \angle O_2IP$ .

Step 84.  $\angle (BO_2, FI) = \angle IFO_2$ ,  $\angle IFO_2 = \angle O_2PI$  and  $\angle BPF = \angle (BO_2, FI) \Rightarrow \angle BPF = \angle O_2PI$ .

Step 85.  $A, B, F$  are collinear and  $\angle AFP = \angle O_2IP \Rightarrow \angle BFP = \angle O_2IP$ .

Step 86.  $\angle BFP = \angle O_2IP$  and  $\angle BPF = \angle O_2PI \Rightarrow \frac{BF}{BP} = \frac{O_2I}{O_2P}$ .

Step 87.  $\angle (AB, FQ) = \angle BPQ$ ,  $\angle O_2FQ = \angle FQO_2$ ,  $\angle FPO_2 = \angle O_2FP$ ,  $\angle O_2PQ = \angle PQO_2$  and  $AB$  is perpendicular to  $FI \Rightarrow$  by angle chasing:  $\angle BPO_2 = \angle IFP$ .

Step 88.  $\angle IFP = \angle FPI$  and  $\angle BPO_2 = \angle IFP \Rightarrow \angle BPO_2 = \angle FPI$ .

Step 89.  $\angle O_2BP = \angle IFP$  and  $\angle BPO_2 = \angle FPI \Rightarrow \frac{PB}{PO_2} = \frac{PF}{PI}$ .

Step 90.  $DI = EI$  and  $DI = IP \Rightarrow EI = IP$ .

Step 91.  $CO_1 = EO_1$  and  $CO_1 = PO_1 \Rightarrow EO_1 = PO_1$ .

Step 92.  $EI = IP$  and  $EO_1 = PO_1 \Rightarrow \angle IEO_1 = \angle O_1PI$ .

Step 93.  $EI = IP$  and  $EO_1 = PO_1 \Rightarrow EP$  is perpendicular to  $IO_1$ .

Step 94.  $CO_1 = EO_1$ ,  $CO_1 = PO_1$  and  $PO_1 = O_1Q \Rightarrow C, E, P, Q$  are cyclic.

Step 95.  $C, E, P, Q$  are cyclic  $\Rightarrow \angle ECQ = \angle EPQ$ .

Step 96.  $CO_1 = PO_1$  and  $PO_1 = O_1Q \Rightarrow CO_1 = O_1Q$ .

Step 97.  $CO_1 = O_1Q \Rightarrow \angle O_1CQ = \angle CQO_1$ .

Step 98.  $CO_1 = EO_1 \Rightarrow \angle CEO_1 = \angle O_1CE$ .

Step 99.  $CO_1 = PO_1 \Rightarrow \angle CPO_1 = \angle O_1CP$ .

Step 100.  $PO_1 = O_1Q \Rightarrow \angle O_1PQ = \angle PQO_1$ .

Step 101.  $A, C, E$  are collinear and  $\angle ECQ = \angle EPQ \Rightarrow \angle ACQ = \angle EPQ$ .

Step 102.  $A, C, E$  are collinear and  $\angle CEO_1 = \angle O_1CE \Rightarrow \angle (AC, EO_1) = \angle O_1CA$ .

Step 103.  $\angle (AC, EO_1) = \angle O_1CA$ ,  $\angle ACQ = \angle EPQ$ ,  $\angle O_1CQ = \angle CQO_1$ ,  $\angle CPO_1 = \angle O_1CP$ ,  $\angle O_1PQ = \angle PQO_1$  and  $AC$  is perpendicular to  $EI \Rightarrow$  by angle chasing:  $\angle CPE = \angle IEO_1$ .

Step 104.  $EI = IP \Rightarrow \angle IEP = \angle EPI$ .

Step 105.  $AC$  is perpendicular to  $EI$ ,  $AC$  is perpendicular to  $IN$  and  $EP$  is perpendicular to  $IO_1 \Rightarrow \angle (AC, EN) = \angle (IO_1, EP)$ .

Step 106.  $\angle IEP = \angle EPI$ ,  $AC$  is perpendicular to  $EI$  and  $AC$  is perpendicular to  $IN \Rightarrow \angle EPI = \angle NEP$ .

Step 107.  $\angle (AC, EN) = \angle (IO_1, EP)$  and  $\angle EPI = \angle NEP \Rightarrow \angle (AC, EP) = \angle O_1IP$ .

Step 108.  $\angle IEO_1 = \angle O_1PI$  and  $\angle CPE = \angle IEO_1 \Rightarrow \angle CPE = \angle O_1PI$ .

Step 109.  $A, C, E$  are collinear and  $\angle (AC, EP) = \angle O_1IP \Rightarrow \angle CEP = \angle O_1IP$ .

Step 110.  $\angle CPE = \angle O_1PI$  and  $\angle CEP = \angle O_1IP \Rightarrow \frac{CE}{CP} = \frac{O_1I}{O_1P}$ .

Step 111.  $\angle ACQ = \angle EPQ$ ,  $\angle O_1CQ = \angle CQO_1$ ,  $\angle CPO_1 = \angle O_1CP$ ,  $\angle O_1PQ = \angle PQO_1$  and  $AC$  is perpendicular to  $EI \Rightarrow$  by angle chasing:  $\angle CPO_1 = \angle IEP$ .

Step 112.  $\angle IEP = \angle EPI$  and  $\angle CPO_1 = \angle IEP \Rightarrow \angle CPO_1 = \angle EPI$ .

Step 113.  $\angle CPO_1 = \angle O_1CP$  and  $\angle CPO_1 = \angle IEP \Rightarrow \angle O_1CP = \angle IEP$ .

- Step 114.  $\angle CPO_1 = \angle EPI$  and  $\angle O_1CP = \angle IEP \Rightarrow \frac{CO_1}{CP} = \frac{EI}{EP}$ .
- Step 115.  $DI = EI$ ,  $DI = IR$  and  $DI = IP \Rightarrow I$  is the circumcenter of  $ERP$ .
- Step 116.  $I$  is the circumcenter of  $ERP$  and  $AE$  is perpendicular to  $EI \Rightarrow \angle AER = \angle EPR$ .
- Step 117.  $A, C, E$  are collinear,  $A, R, P$  are collinear and  $\angle AER = \angle EPR \Rightarrow \angle(AC, ER) = \angle(EP, AR)$ .
- Step 118.  $A, C, E$  are collinear,  $A, R, P$  are collinear and  $\angle(AC, ER) = \angle(EP, AR) \Rightarrow \angle AER = \angle EPA$ .
- Step 119.  $A, R, P$  are collinear and  $\angle AER = \angle EPR \Rightarrow \angle AEP = \angle ERA$ .
- Step 120.  $\angle AER = \angle EPA$  and  $\angle AEP = \angle ERA \Rightarrow \frac{AE}{AP} = \frac{AR}{AE}$  and  $\frac{EA}{EP} = \frac{RA}{RE}$ .
- Step 121.  $DI = EI$ ,  $DI = IR$ ,  $DI = IP$  and  $EI = FI \Rightarrow I$  is the circumcenter of  $FRP$ .
- Step 122.  $I$  is the circumcenter of  $FRP$  and  $AF$  is perpendicular to  $FI \Rightarrow \angle AFR = \angle FPR$ .
- Step 123.  $A, R, P$  are collinear and  $\angle AFR = \angle FPR \Rightarrow \angle AFP = \angle FRA$ .
- Step 124.  $A, R, P$  are collinear  $\Rightarrow \angle FAR = \angle FAP$ .
- Step 125.  $\angle AFP = \angle FRA$  and  $\angle FAR = \angle FAP \Rightarrow \frac{FA}{FR} = \frac{PA}{PF}$ .
- Step 126.  $DI = EI$ ,  $DI = IR$ ,  $EI = FI$  and  $\frac{FB}{FD} = \frac{RI}{RE} \Rightarrow \frac{FI}{FD} = \frac{FI}{ER}$ .
- Step 127.  $CD = CE$  and  $\frac{DC}{DE} = \frac{FI}{FR} \Rightarrow \frac{EC}{ED} = \frac{FI}{FR}$ .
- Step 128.  $AC = CG$  and  $\frac{CA}{CN} = \frac{DF}{DE} \Rightarrow \frac{CN}{CG} = \frac{DE}{DF}$ .
- Step 129.  $PO_2 = O_2Q$  and  $\frac{BF}{BP} = \frac{O_2I}{O_2P} \Rightarrow \frac{BF}{BP} = \frac{O_2I}{O_2Q}$ .
- Step 130.  $FI = IP$ ,  $PO_2 = O_2Q$  and  $\frac{PB}{PO_2} = \frac{PF}{PI} \Rightarrow \frac{BP}{O_2Q} = \frac{FP}{FI}$ .
- Step 131.  $PO_1 = O_1Q$  and  $\frac{CE}{CP} = \frac{O_1I}{O_1P} \Rightarrow \frac{CE}{CP} = \frac{O_1I}{O_1Q}$ .
- Step 132.  $CO_1 = O_1Q$ ,  $EI = FI$  and  $\frac{CO_1}{CP} = \frac{EI}{EP} \Rightarrow \frac{CP}{O_1Q} = \frac{EP}{FI}$ .
- Step 133.  $AE = AF$  and  $\frac{AE}{AP} = \frac{AR}{AE} \Rightarrow \frac{AF}{AP} = \frac{AR}{AF}$ .
- Step 134.  $AE = AF$  and  $\frac{EA}{EP} = \frac{RA}{RE} \Rightarrow \frac{AF}{EP} = \frac{RA}{RE}$ .
- Step 135.  $\frac{AF}{AP} = \frac{AR}{AF}$ ,  $\frac{AF}{EP} = \frac{RA}{RE}$ ,  $\frac{BF}{BP} = \frac{O_2I}{O_2Q}$ ,  $\frac{BP}{O_2Q} = \frac{FP}{FI}$ ,  $\frac{CE}{CP} = \frac{O_1I}{O_1Q}$ ,  $\frac{CP}{O_1Q} = \frac{EP}{FI}$ ,  $\frac{CN}{CG} = \frac{DE}{DF}$ ,  $\frac{EC}{ED} = \frac{FI}{FR}$ ,  $\frac{FA}{FR} = \frac{PA}{PF}$  and  $\frac{FB}{FD} = \frac{FI}{ER} \Rightarrow$  by ratio chasing:  $\frac{CN}{CG} = \frac{IO_1}{IO_2}$ .
- Step 136.  $DI = EI$ ,  $DI = IP$  and  $EI = FI \Rightarrow I$  is the circumcenter of  $EFP$ .
- Step 137.  $I$  is the circumcenter of  $EFP$  and  $AF$  is perpendicular to  $FI \Rightarrow \angle AFP = \angle FEP$ .
- Step 138.  $EP$  is perpendicular to  $IO_1$  and  $FP$  is perpendicular to  $IO_2 \Rightarrow \angle(EP, IO_1) = \angle(FP, IO_2)$ .
- Step 139.  $\angle AFP = \angle FEP$ ,  $AI$  is perpendicular to  $CN$  and  $AI$  is perpendicular to  $EF \Rightarrow \angle AFP = \angle(CN, EP)$ .
- Step 140.  $\angle(EP, IO_1) = \angle(FP, IO_2)$  and  $\angle AFP = \angle(CN, EP) \Rightarrow \angle(AF, IO_2) = \angle(CN, IO_1)$ .
- Step 141.  $A, B, F$  are collinear,  $\angle(AF, IO_2) = \angle(CN, IO_1)$  and  $AB$  is parallel to  $CG \Rightarrow \angle NCG = \angle O_1IO_2$ .



Step 142.  $\angle NCG = \angle O_1IO_2$  and  $\frac{CN}{CG} = \frac{IO_1}{IO_2} \Rightarrow \angle CNG = \angle IO_1O_2$ .

Step 143.  $I$  is the circumcenter of  $DER$  and  $AE$  is perpendicular to  $EI \Rightarrow \angle AED = \angle ERD$ .

Step 144.  $A, C, E$  are collinear,  $\angle AED = \angle ERD$ ,  $AI$  is perpendicular to  $EF$  and  $DR$  is perpendicular to  $EF \Rightarrow \angle(AC, DE) = \angle(ER, AI)$ .

Step 145.  $AI$  is perpendicular to  $CN$  and  $CI$  is perpendicular to  $DE \Rightarrow \angle(AI, CN) = \angle(DE, CI)$ .

Step 146.  $\angle(AC, DE) = \angle(ER, AI)$  and  $\angle(AI, CN) = \angle(DE, CI) \Rightarrow \angle ACI = \angle(ER, CN)$ .

Step 147.  $A, C, E$  are collinear,  $\angle ACI = \angle(ER, CN)$ ,  $\angle ANE = \angle ICE$ ,  $AC$  is perpendicular to  $EI$ ,  $AC$  is perpendicular to  $IN$ ,  $AI$  is perpendicular to  $CN$  and  $AI$  is perpendicular to  $EF \Rightarrow \angle ANI = \angle FER$ .

Step 148.  $\angle AFE = \angle AIE$ ,  $\angle AFR = \angle FER$ ,  $AC$  is perpendicular to  $EI$  and  $AC$  is perpendicular to  $IN \Rightarrow \angle AIN = \angle FRE$ .

Step 149.  $\angle AIN = \angle FRE$  and  $\angle ANI = \angle FER \Rightarrow \frac{AN}{AI} = \frac{FE}{FR}$ .

Step 150.  $A, C, E$  are collinear,  $AG$  is parallel to  $CN$ ,  $AI$  is perpendicular to  $CN$  and  $AI$  is perpendicular to  $EF \Rightarrow \angle CAG = \angle AEF$ .

Step 151.  $A, B, F$  are collinear,  $A, C, E$  are collinear and  $AB$  is parallel to  $CG \Rightarrow \angle ACG = \angle EAF$ .

Step 152.  $\angle CAG = \angle AEF$  and  $\angle ACG = \angle EAF \Rightarrow \frac{FA}{FE} = \frac{GC}{GA}$ .

Step 153.  $EI = FI$  and  $\frac{EA}{EI} = \frac{FA}{FI} \Rightarrow \frac{AE}{EI} = \frac{FA}{FI}$ .

Step 154.  $AE = AF$ ,  $EI = FI$  and  $\frac{EA}{EI} = \frac{EN}{EC} \Rightarrow \frac{FA}{FI} = \frac{EN}{EC}$ .

Step 155.  $AE = AF$  and  $\frac{AI}{AE} = \frac{NC}{NE} \Rightarrow \frac{AI}{AF} = \frac{NC}{NE}$ .

Step 156.  $\frac{AE}{FI} = \frac{FA}{FI}$ ,  $\frac{AI}{AF} = \frac{NC}{NE}$ ,  $\frac{AN}{AI} = \frac{FE}{FR}$ ,  $\frac{CN}{CG} = \frac{DE}{DF}$ ,  $\frac{EC}{ED} = \frac{FI}{FR}$ ,  $\frac{FA}{FE} = \frac{GC}{GA}$  and  $\frac{FA}{FI} = \frac{EN}{EC} \Rightarrow$  by ratio chasing:  $\frac{AE}{DF} = \frac{AN}{AG}$ .

Step 157.  $A, C, E$  are collinear,  $\angle NAE = \angle CIE$  and  $AC$  is perpendicular to  $EI \Rightarrow AN$  is perpendicular to  $CI$ .

Step 158.  $AN$  is perpendicular to  $CI$  and  $CI$  is perpendicular to  $DE \Rightarrow AN$  is parallel to  $DE$ .

Step 159.  $AE = AF$  and  $\frac{AE}{DF} = \frac{AN}{AG} \Rightarrow \frac{FA}{FD} = \frac{AN}{AG}$ .

Step 160.  $\angle AFD = \angle FED$ ,  $AN$  is parallel to  $DE$ ,  $AG$  is parallel to  $CN$ ,  $AI$  is perpendicular to  $CN$  and  $AI$  is perpendicular to  $EF \Rightarrow \angle AFD = \angle GAN$ .

Step 161.  $\angle AFD = \angle GAN$  and  $\frac{FA}{FD} = \frac{AN}{AG} \Rightarrow \angle ADF = \angle AGN$ .

Step 162.  $DI = EI$ ,  $DI = IP$  and  $EI = FI \Rightarrow I$  is the circumcenter of  $DFP$ .

Step 163.  $I$  is the circumcenter of  $DFP$  and  $AF$  is perpendicular to  $FI \Rightarrow \angle AFD = \angle FPD$ .

Step 164.  $DI = EI$  and  $DI = IP \Rightarrow I$  is the circumcenter of  $DEP$ .

Step 165.  $I$  is the circumcenter of  $DEP$  and  $AE$  is perpendicular to  $EI \Rightarrow \angle AED = \angle EPD$ .

Step 166.  $A, B, F$  are collinear,  $P, Q, T$  are collinear,  $\angle FBQ = \angle FPQ$  and  $\angle AFD = \angle FPD \Rightarrow \angle BQT = \angle FDP$ .

Step 167.  $A, C, E$  are collinear,  $P, Q, T$  are collinear,  $\angle ECQ = \angle EPQ$  and  $\angle AED = \angle EPD \Rightarrow \angle CQT = \angle EDP$ .

Step 168.  $\angle BQT = \angle FDP$  and  $\angle CQT = \angle EDP \Rightarrow \angle BQC = \angle FDE$ .

Step 169.  $DI = EI$  and  $EI = FI \Rightarrow DI = FI$ .

Step 170.  $DI = FI \Rightarrow \angle DFI = \angle IDF$ .

Step 171.  $A, B, F$  are collinear,  $B, C, D$  are collinear,  $AB$  is perpendicular to  $FI$  and  $BC$  is perpendicular to  $DI \Rightarrow \angle BDI = \angle BFI$ .

Step 172.  $\angle BDI = \angle BFI \Rightarrow B, D, F, I$  are cyclic.

Step 173.  $B, D, F, I$  are cyclic  $\Rightarrow \angle DBI = \angle DFI$ .

Step 174.  $A, C, E$  are collinear,  $B, C, D$  are collinear,  $AC$  is perpendicular to  $EI$  and  $BC$  is perpendicular to  $DI \Rightarrow \angle CDI = \angle CEI$ .

Step 175.  $\angle CDI = \angle CEI \Rightarrow C, D, E, I$  are cyclic.

Step 176.  $C, D, E, I$  are cyclic  $\Rightarrow \angle ECI = \angle EDI$ .

Step 177.  $B, C, D$  are collinear,  $D, I, T$  are collinear,  $\angle DBI = \angle DFI$  and  $\angle DFI = \angle IDF \Rightarrow \angle CBI = \angle (IT, DF)$ .

Step 178.  $A, C, E$  are collinear,  $D, I, T$  are collinear,  $CI$  is the bisector of  $\angle ACB$  and  $\angle ECI = \angle EDI \Rightarrow \angle BCI = \angle (IT, DE)$ .

Step 179.  $\angle CBI = \angle (IT, DF)$  and  $\angle BCI = \angle (IT, DE) \Rightarrow \angle BIC = \angle FDE$ .

Step 180.  $\angle BIC = \angle FDE$  and  $\angle BQC = \angle FDE \Rightarrow \angle BIC = \angle BQC$ .

Step 181.  $\angle BIC = \angle BQC \Rightarrow B, C, I, Q$  are cyclic.

Step 182.  $B, C, I, Q$  are cyclic  $\Rightarrow \angle CBI = \angle CQI$  and  $\angle BCQ = \angle BIQ$ .

Step 183.  $B, C, D$  are collinear,  $\angle (BC, DR) = \angle (IT, EF)$ ,  $\angle CDF = \angle DRF$ ,  $AI$  is perpendicular to  $CN$  and  $AI$  is perpendicular to  $EF \Rightarrow \angle (CN, IT) = \angle RFD$ .

Step 184.  $A, C, E$  are collinear,  $\angle AEF = \angle ERF$ ,  $AI$  is perpendicular to  $CN$  and  $AI$  is perpendicular to  $EF \Rightarrow \angle ACN = \angle ERF$ .

Step 185.  $\angle ACN = \angle ERF$  and  $\angle (CN, IT) = \angle RFD \Rightarrow \angle (AC, IT) = \angle (ER, DF)$ .

Step 186.  $B, C, D$  are collinear and  $\angle DBI = \angle DFI \Rightarrow \angle (BC, DF) = \angle BIF$ .

Step 187.  $D, I, T$  are collinear and  $\angle DFI = \angle IDF \Rightarrow \angle (DF, IT) = \angle IFD$ .

Step 188.  $\angle (BC, DF) = \angle BIF$  and  $\angle (DF, IT) = \angle IFD \Rightarrow \angle (BC, IT) = \angle (BI, DF)$ .

Step 189.  $\angle (AC, IT) = \angle (ER, DF)$  and  $\angle (BC, IT) = \angle (BI, DF) \Rightarrow \angle (AC, ER) = \angle CBI$ .

Step 190.  $PO_1 = O_1Q$  and  $PO_2 = O_2Q \Rightarrow PQ$  is perpendicular to  $O_1O_2$ .

Step 191.  $P, Q, T$  are collinear,  $EP$  is perpendicular to  $IO_1$  and  $PQ$  is perpendicular to  $O_1O_2 \Rightarrow \angle (EP, IO_1) = \angle (QT, O_1O_2)$ .

Step 192.  $A, C, E$  are collinear,  $P, Q, T$  are collinear and  $\angle ECQ = \angle EPQ \Rightarrow \angle (AC, EP) = \angle CQT$ .

Step 193.  $\angle (AC, EP) = \angle CQT$  and  $\angle (EP, IO_1) = \angle (QT, O_1O_2) \Rightarrow \angle (AC, IO_1) = \angle (CQ, O_1O_2)$ .

Step 194.  $\angle (AC, ER) = \angle CBI$  and  $\angle CBI = \angle CQI \Rightarrow \angle (AC, ER) = \angle CQI$ .

Step 195.  $\angle (AC, ER) = \angle CQI$  and  $\angle (AC, IO_1) = \angle (CQ, O_1O_2) \Rightarrow \angle (ER, IQ) = \angle IO_1O_2$ .

Step 196.  $\angle (BC, IT) = \angle (BI, DF)$  and  $\angle BCQ = \angle BIQ \Rightarrow \angle (CQ, IT) = \angle (IQ, DF)$ .

Step 197.  $\angle ADF = \angle AGN$ ,  $\angle(ER, IQ) = \angle IO_1O_2$ ,  $\angle CNG = \angle IO_1O_2$  and  $AG$  is parallel to  $CN \Rightarrow \angle ADF = \angle(ER, IQ)$ .

Step 198.  $\angle(CQ, IT) = \angle(IQ, DF) \Rightarrow \angle CQI = \angle(IT, DF)$ .

Step 199.  $\angle ADF = \angle(ER, IQ)$  and  $\angle CQI = \angle(IT, DF) \Rightarrow \angle(AD, IT) = \angle(ER, CQ)$ .

Step 200.  $P, Q, T$  are collinear and  $\angle ACQ = \angle EPQ \Rightarrow \angle ACQ = \angle(EP, QT)$ .

Step 201.  $\angle(AC, ER) = \angle(EP, AR)$  and  $\angle ACQ = \angle(EP, QT) \Rightarrow \angle(AR, QT) = \angle(ER, CQ)$ .

Step 202.  $A, R, P$  are collinear,  $D, I, T$  are collinear,  $P, Q, T$  are collinear,  $\angle(AD, IT) = \angle(ER, CQ)$  and  $\angle(AR, QT) = \angle(ER, CQ) \Rightarrow \angle ADT = \angle APT$ .

Step 203.  $\angle ADT = \angle APT \Rightarrow A, D, P, T$  are cyclic.

Step 204.  $A, D, P, T$  are cyclic  $\Rightarrow \angle ADP = \angle ATP$ .

Step 205.  $A, B, F$  are collinear,  $P, Q, T$  are collinear,  $\angle FBQ = \angle FPQ$ ,  $\angle AFP = \angle FEP$ ,  $AI$  is perpendicular to  $CN$  and  $AI$  is perpendicular to  $EF \Rightarrow \angle BQT = \angle(CN, EP)$ .

Step 206.  $\angle(EP, IO_1) = \angle(QT, O_1O_2)$  and  $\angle BQT = \angle(CN, EP) \Rightarrow \angle(BQ, CN) = \angle O_2O_1I$ .

Step 207.  $\angle(BQ, CN) = \angle O_2O_1I$ ,  $\angle ADF = \angle AGN$ ,  $\angle CNG = \angle IO_1O_2$  and  $AG$  is parallel to  $CN \Rightarrow \angle ADF = \angle(CN, BQ)$ .

Step 208.  $\angle ADF = \angle(CN, BQ)$  and  $\angle BQT = \angle FDP \Rightarrow \angle ADP = \angle(CN, QT)$ .

Step 209.  $P, Q, T$  are collinear,  $\angle ADP = \angle(CN, QT)$  and  $\angle ADP = \angle ATP \Rightarrow \angle ATQ = \angle(CN, QT)$ .

Step 210.  $\angle ATQ = \angle(CN, QT) \Rightarrow AT$  is parallel to  $CN$ .

Step 211.  $AT$  is parallel to  $CN$  and  $AI$  is perpendicular to  $CN \Rightarrow AI$  is perpendicular to  $AT$

■

## 2.28 IMO 2020 P1

**Original:**

Consider the convex quadrilateral  $ABCD$ . The point  $P$  is in the interior of  $ABCD$ . The following ratio equalities hold:  $\angle PAD : \angle PBA : \angle DPA = 1 : 2 : 3 = \angle CBP : \angle BAP : \angle BPC$ . Prove that the following three lines meet in a point: the internal bisectors of angles  $\angle ADP$  and  $\angle PCB$  and the perpendicular bisector of segment  $AB$ .

**Translated:**

Let  $PAB$  be a triangle. Define point  $X$  such that  $BX$  is the bisector of  $\angle PBA$ . Define point  $Y$  such that  $AY$  is the bisector of  $\angle PAB$ . Define point  $Z$  such that  $\angle(PA, BX) = \angle ZAB$  and  $\angle PAZ = \angle XBA$ . Define point  $T$  such that  $\angle PAZ = \angle TPA$ . Define point  $D$  on line  $AZ$  such that  $\angle PBA = \angle DPT$ . Define point  $U$  such that  $\angle PBU = \angle YAB$ . Define point  $V$  such that  $\angle PBU = \angle VPB$ . Define point  $C$  on line  $BU$  such that  $\angle PAB = \angle CPV$ . Define point  $O$  such that  $DO$  is the bisector of  $\angle PDA$  and  $CO$  is the bisector of  $\angle PCB$ . Prove that  $AO = BO$

**Proof:**

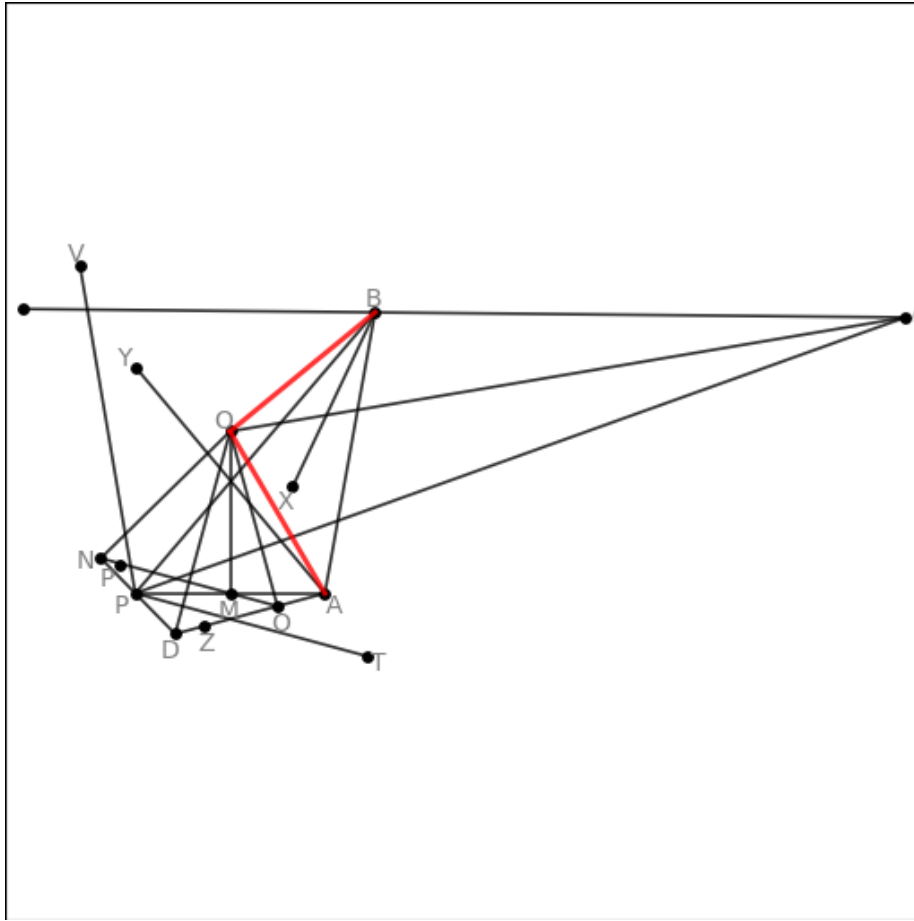

Figure 28: imo 2020 p1

- Construct point  $M$  as the foot of  $O$  on line  $PA$ .  
 Construct point  $N$  as the foot of  $O$  on line  $PD$ .  
 Construct point  $E$  as the foot of  $O$  on line  $AD$ .
- Step 1.  $P, D, N$  are collinear,  $A, D, E$  are collinear,  $PD$  is perpendicular to  $ON$  and  $AD$  is perpendicular to  $OE \Rightarrow \angle DNO = \angle DEO$ .  
 Step 2.  $\angle DNO = \angle DEO \Rightarrow D, O, N, E$  are cyclic.  
 Step 3.  $D, O, N, E$  are cyclic  $\Rightarrow \angle ODE = \angle ONE$ .  
 Step 4.  $P, A, M$  are collinear,  $P, D, N$  are collinear,  $PA$  is perpendicular to  $OM$  and  $PD$  is perpendicular to  $ON \Rightarrow \angle PMO = \angle PNO$ .  
 Step 5.  $\angle PMO = \angle PNO \Rightarrow P, O, M, N$  are cyclic.  
 Step 6.  $P, O, M, N$  are cyclic  $\Rightarrow \angle OPM = \angle ONM$ .  
 Step 7.  $P, A, M$  are collinear and  $\angle(PA, BX) = \angle ZAB \Rightarrow \angle ZAB = \angle(AM, BX)$ .

Step 8.  $\angle ZAB = \angle(AM, BX)$  and  $BX$  is the bisector of  $\angle PBA \Rightarrow \angle(PB, AM) = \angle(BX, AZ)$ .

Step 9.  $P, A, M$  are collinear,  $A, Z, D$  are collinear,  $A, D, E$  are collinear,  $\angle OPM = \angle ONM$  and  $\angle ODE = \angle ONE \Rightarrow \angle(PO, AM) = \angle(DO, AZ)$ .

Step 10.  $\angle(PB, AM) = \angle(BX, AZ)$  and  $\angle(PO, AM) = \angle(DO, AZ) \Rightarrow \angle BPO = \angle(BX, DO)$ .

Step 11.  $P, A, M$  are collinear,  $AY$  is the bisector of  $\angle PAB$ ,  $\angle PBU = \angle VPB$  and  $\angle PBU = \angle YAB \Rightarrow \angle BPV = \angle YAM$ .

Step 12.  $B, U, C$  are collinear and  $\angle PBU = \angle YAB \Rightarrow \angle(PB, UC) = \angle YAB$ .

Step 13.  $\angle BPV = \angle YAM$  and  $\angle(PB, UC) = \angle YAB \Rightarrow \angle(PV, UC) = \angle MAB$ .

Step 14.  $P, A, M$  are collinear and  $\angle PAZ = \angle TPA \Rightarrow \angle(PT, AM) = \angle MAZ$ .

Step 15.  $\angle(PT, AM) = \angle MAZ$  and  $\angle ZAB = \angle(AM, BX) \Rightarrow \angle(PT, BX) = \angle MAB$ .

Step 16.  $B, U, C$  are collinear and  $CO$  is the bisector of  $\angle PCB \Rightarrow \angle PCO = \angle(CO, BU)$ .

Step 17.  $\angle PAB = \angle CPV$ ,  $AY$  is the bisector of  $\angle PAB$ ,  $\angle PBU = \angle VPB$ ,  $\angle PBU = \angle YAB$  and  $\angle PCO = \angle(CO, BU) \Rightarrow$  by angle chasing:  $PV$  is perpendicular to  $CO$ .

Step 18.  $A, Z, D$  are collinear and  $DO$  is the bisector of  $\angle PDA \Rightarrow \angle PDO = \angle(DO, AZ)$ .

Step 19.  $\angle PAZ = \angle TPA$ ,  $\angle PAZ = \angle XBA$ ,  $\angle PBA = \angle DPT$ ,  $BX$  is the bisector of  $\angle PBA$  and  $\angle PDO = \angle(DO, AZ) \Rightarrow$  by angle chasing:  $\angle(DO, PT) = \frac{1}{2}\pi$ .

Step 20.  $\angle(PT, BX) = \angle MAB$  and  $\angle(PV, UC) = \angle MAB \Rightarrow \angle(PT, BX) = \angle(PV, UC)$ .

Step 21.  $\angle(DO, PT) = \frac{1}{2}\pi$  and  $PV$  is perpendicular to  $CO \Rightarrow \angle(PT, DO) = \angle(PV, CO)$ .

Step 22.  $\angle(PT, BX) = \angle(PV, UC)$  and  $\angle(PT, DO) = \angle(PV, CO) \Rightarrow \angle(BX, DO) = \angle UCO$ .

Step 23.  $B, U, C$  are collinear,  $\angle BPO = \angle(BX, DO)$  and  $\angle(BX, DO) = \angle UCO \Rightarrow \angle BPO = \angle BCO$ .

Step 24.  $\angle BPO = \angle BCO \Rightarrow P, B, C, O$  are cyclic.

Step 25.  $P, B, C, O$  are cyclic and  $CO$  is the bisector of  $\angle PCB \Rightarrow PO = BO$ .

Step 26.  $P, D, N$  are collinear,  $A, D, E$  are collinear,  $PD$  is perpendicular to  $ON$  and  $AD$  is perpendicular to  $OE \Rightarrow \angle DEO = \angle OND$ .

Step 27.  $P, D, N$  are collinear,  $A, Z, D$  are collinear,  $A, D, E$  are collinear and  $\angle PDO = \angle(DO, AZ) \Rightarrow DO$  is the bisector of  $\angle EDN$ .

Step 28.  $DO$  is the bisector of  $\angle EDN$  and  $\angle DEO = \angle OND \Rightarrow ON = OE$ .

Step 29.  $ON = OE \Rightarrow \angle ONE = \angle NEO$ .

Step 30.  $P, A, M$  are collinear,  $A, D, E$  are collinear,  $PA$  is perpendicular to  $OM$  and  $AD$  is perpendicular to  $OE \Rightarrow \angle AMO = \angle AEO$ .

Step 31.  $\angle AMO = \angle AEO \Rightarrow A, O, M, E$  are cyclic.

- Step 32.  $A, O, M, E$  are cyclic  $\Rightarrow \angle AOE = \angle AME$ .  
 Step 33.  $P, A, M$  are collinear,  $\angle OPM = \angle ONM$ ,  $\angle AOE = \angle AME$  and  $\angle ONE = \angle NEO \Rightarrow \angle PAO = \angle OPA$ .  
 Step 34.  $\angle PAO = \angle OPA \Rightarrow PO = AO$ .  
 Step 35.  $PO = AO$  and  $PO = BO \Rightarrow AO = BO$

■

## 2.29 IMO 2021 P3

### Original:

Let  $D$  be an interior point of the triangle  $ABC$  with  $AB \perp AC$  so that  $\angle DAB = \angle CAD$ . The point  $E$  on the segment  $AC$  satisfies  $\angle ADE = \angle BCD$ , the point  $F$  on the segment  $AB$  satisfies  $\angle FDA = \angle DBC$ , and the point  $X$  on the line  $AC$  satisfies  $CX = BX$ . Let  $O_1$  and  $O_2$  be the circumcenters of the triangles  $ADC$  and  $EDX$ , respectively. Prove that the lines  $BC$ ,  $EF$ , and  $O_1O_2$  are concurrent.

### Translated:

Let  $ABC$  be a triangle. Define point  $D$  such that  $AD$  is the bisector of  $\angle BAC$ . Define point  $E$  on line  $AC$  such that  $\angle ADE = \angle BCD$ . Define point  $F$  on line  $AB$  such that  $\angle ADF = \angle CBD$ . Define point  $X$  on line  $AC$  such that  $BX = CX$  and  $\angle BCX = \angle XBC$ . Define point  $O_1$  as the circumcenter of triangle  $CDA$ . Define point  $O_2$  as the circumcenter of triangle  $EDX$ . Define point  $Y$  as the intersection of lines  $BC$  and  $EF$ . Prove that  $O_1, O_2, Y$  are collinear

### Proof:

Not solved.

## 2.30 IMO 2022 P4

### Original:

Let  $ABCDE$  be a convex pentagon such that  $BC = DE$ . Assume that there is a point  $T$  inside  $ABCDE$  with  $TB = TD$ ,  $TC = TE$  and  $\angle ABT = \angle TEA$ . Let line  $AB$  intersect lines  $CD$  and  $CT$  at points  $P$  and  $Q$ , respectively. Assume that the points  $P, B, A, Q$  occur on their line in that order. Let line  $AE$  intersect  $CD$  and  $DT$  at points  $R$  and  $S$ , respectively. Assume that the points  $R, E, A, S$  occur on their line in that order. Prove that the points  $P, S, Q, R$  lie on a circle.

### Translated:

Let  $BCD$  be a triangle. Define point  $E$  such that  $BC = DE$ . Define point  $T$  such that  $TB = TD$  and  $CT = ET$ . Define point  $A$  such that  $\angle AET = \angle TBA$ . Define point  $P$  as the intersection of lines  $AB$  and  $CD$ . Define point  $Q$  as the intersection of lines  $AB$  and  $CT$ . Define point  $R$  as the intersection of lines  $AE$  and  $CD$ . Define point  $S$  as the intersection of lines  $AE$  and  $DT$ . Prove that  $P, Q, R, S$  are cyclic

### Proof:

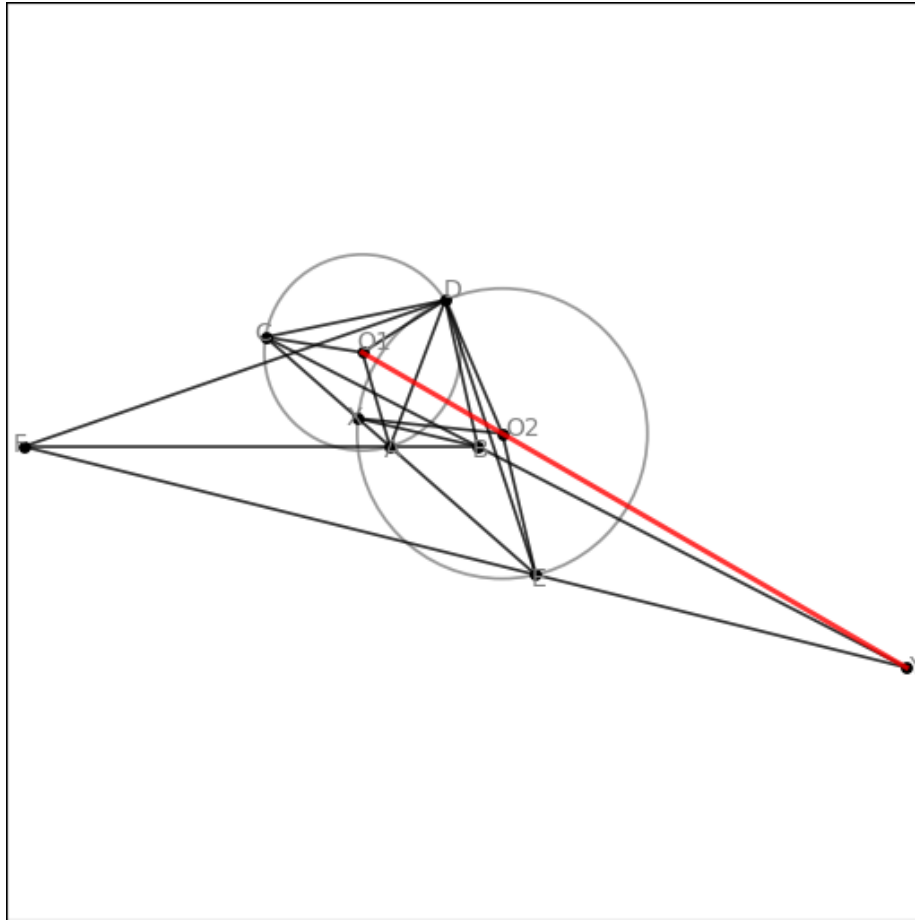

Figure 29: imo 2021 p3

Step 1.  $BC = DE$ ,  $BT = DT$  and  $CT = ET \Rightarrow \angle BTC = \angle DTE$ ,  $\angle CBT = \angle EDT$  and  $\angle BCT = \angle DET$ .

Step 2.  $C, Q, T$  are collinear,  $D, S, T$  are collinear and  $\angle BTC = \angle DTE \Rightarrow \angle BTQ = \angle STE$ .

Step 3.  $A, B, Q$  are collinear,  $A, E, S$  are collinear and  $\angle AET = \angle TBA \Rightarrow \angle QBT = \angle TES$ .

Step 4.  $\angle QBT = \angle TES$  and  $\angle BTQ = \angle STE \Rightarrow \frac{TB}{TE} = \frac{TQ}{TS}$ .

Step 5.  $BT = DT$ ,  $CT = ET$  and  $\frac{TB}{TE} = \frac{TQ}{TS} \Rightarrow \frac{TC}{TD} = \frac{TS}{TQ}$ .

Step 6.  $C, Q, T$  are collinear and  $D, S, T$  are collinear  $\Rightarrow \angle CTD = \angle QTS$ .

Step 7.  $\angle CTD = \angle QTS$  and  $\frac{TC}{TD} = \frac{TS}{TQ} \Rightarrow \angle DCT = \angle TSQ$ .

Step 8.  $C, Q, T$  are collinear,  $D, S, T$  are collinear and  $\angle DCT = \angle TSQ \Rightarrow \angle DCQ = \angle DSQ$ .

Step 9.  $D, S, T$  are collinear and  $\angle CBT = \angle EDT \Rightarrow \angle CBT = \angle EDS$ .

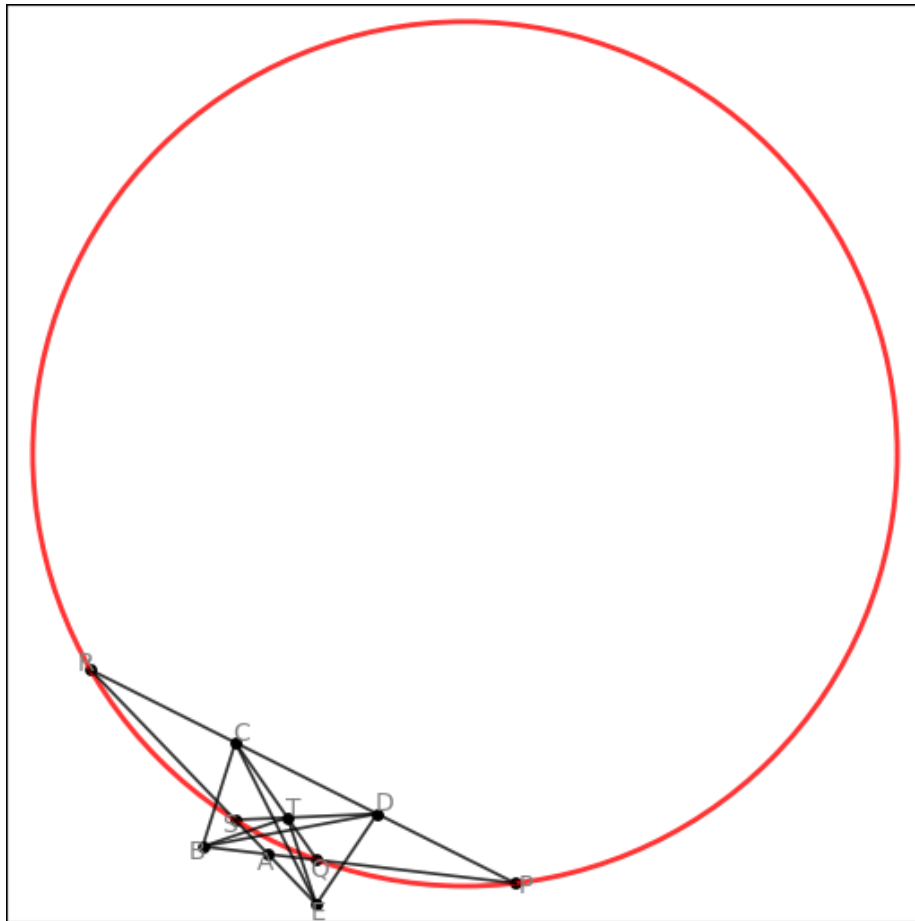

Figure 30: imo 2022 p4

Step 10.  $C, Q, T$  are collinear and  $\angle BCT = \angle DET \Rightarrow \angle BCQ = \angle DET$ .

Step 11.  $\angle CBT = \angle EDS$ ,  $\angle BCQ = \angle DET$ ,  $\angle DCQ = \angle DSQ$  and  $\angle AET = \angle TBA \Rightarrow$  by angle chasing:  $\angle (AB, QS) = \angle (CD, AE)$ .

Step 12.  $A, B, P$  are collinear,  $A, B, Q$  are collinear,  $A, E, R$  are collinear,  $A, E, S$  are collinear,  $C, D, P$  are collinear,  $C, D, R$  are collinear and  $\angle (AB, QS) = \angle (CD, AE) \Rightarrow \angle PQS = \angle PRS$ .

Step 13.  $\angle PQS = \angle PRS \Rightarrow P, Q, R, S$  are cyclic

■
